# Supplementary material
Source: publisher site journal article supplement (https://www.spandidos-publications.com/1966/downloadSupplementary)
Supplement: Supplementary file 1 [file downloadSupplementary]

## Sheet: Supplemental table 1
Table SI. Differentially expressed lncRNAs in patients with SLN (+/-) metastasis.
Gene	Gene length, bp	SLN(-), expression	SLN(+), expression	SLN(-), RPKM	SLN(+), RPKM	log2 ratio, SLN(+)/SLN(-)	Up/downregulation, SLN(+)/SLN(-)	P-value	FDR
lnc-DDX47-3:1	2740	1	590	0.391338	225.815	9.17251	Up	4.96e-173	5.9e-170
LINC01087:1	3516	9	2614	2.74471	779.664	8.15005	Up	0	0
lnc-SLC39A11-10:48	5836	1	281	0.183733	50.4942	8.10236	Up	8.16e-82	3.28e-79
TBILA:3	1937	1	246	0.553571	133.185	7.91045	Up	1.67e-71	5.7e-69
lnc-CCDC74A-8:1	1521	5	1145	3.52487	789.454	7.80714	Up	0	0
lnc-DTNBP1-16:4	73231	1	208	0.0146422	2.97865	7.66838	Up	2.55e-60	6.65e-58
lnc-DHCR24-1:1	503	2	359	4.26348	748.475	7.45578	Up	7.31e-103	4.34e-100
lnc-CCDC74A-11:1	5658	18	3034	3.41124	562.346	7.36502	Up	0	0
lnc-ADPRHL1-5:1	509	1	150	2.10661	309.047	7.19676	Up	2.81e-43	4.72e-41
lnc-IDNK-10:1	5970	1	131	0.179609	23.0116	7.00136	Up	1.05e-37	1.47e-35
lnc-TTC6-2:1	2101	1	123	0.51036	61.3945	6.91045	Up	2.31e-35	3e-33
lnc-POTEF-6:2	7515	1	115	0.142683	16.0479	6.81343	Up	5.06e-33	5.89e-31
lnc-HIST2H3D-1:1	3543	1	102	0.302644	30.1911	6.64036	Up	3.2e-29	3.11e-27
lnc-MYO9A-1:1	2173	2	194	0.9869	93.6252	6.56785	Up	1.64e-54	3.76e-52
LINC01123:8	2271	1	88	0.472156	40.6365	6.42737	Up	3.89e-25	3.08e-23
lnc-FGFBP2-1:1	2042	6	431	3.15064	221.346	6.13452	Up	3e-117	2.16e-114
lnc-SGMS2-3:1	582	3	203	5.52715	365.783	6.04831	Up	1.33e-55	3.15e-53
lnc-CHODL-2:2	1793	3	200	1.79409	116.977	6.02683	Up	9.82e-55	2.27e-52
lnc-DERA-7:1	12811	1	63	0.0836989	5.15713	5.94522	Up	7.18e-18	3.58e-16
lnc-ADAMTS15-2:3	4587	2	122	0.467524	27.8921	5.89867	Up	1.41e-33	1.69e-31
lnc-TM4SF4-4:1	1709	2	113	1.25485	69.3405	5.78812	Up	5.63e-31	5.83e-29
lnc-SETDB1-1:3	631	1	56	1.69931	93.0699	5.77529	Up	7.6e-16	3.24e-14
lnc-MUC13-7:1	1986	1	54	0.539913	28.5145	5.72282	Up	2.87e-15	1.15e-13
lnc-POTEF-6:10	3793	1	53	0.282696	14.6536	5.69586	Up	5.59e-15	2.16e-13
lnc-TBC1D22A-4:12	152544	89	4580	0.625601	31.4863	5.65333	Up	0	0
lnc-SHANK2-1:9	5541	1	51	0.193515	9.65234	5.64036	Up	2.11e-14	7.74e-13
lnc-CPVL-4:6	5425	4	190	0.790611	36.7286	5.53779	Up	1.88e-50	3.83e-48
lnc-RUNX1-12:7	3622	1	47	0.296043	13.6082	5.52253	Up	2.99e-13	9.95e-12
lnc-FANCC-1:9	2692	1	47	0.398316	18.3094	5.52253	Up	2.99e-13	9.96e-12
lnc-PDCL2-2:2	476	1	47	2.25266	103.548	5.52253	Up	2.99e-13	9.97e-12
lnc-NSMCE4A-7:4	8183	1	45	0.131036	5.76701	5.45979	Up	1.12e-12	3.51e-11
lnc-NR5A1-8:1	2110	1	45	0.508183	22.3656	5.45979	Up	1.12e-12	3.51e-11
LNCOC1:9	28468	1	44	0.0376657	1.62086	5.42737	Up	2.17e-12	6.59e-11
lnc-PCM1-4:13	11774	3	129	0.273212	11.4899	5.3942	Up	2.93e-34	3.63e-32
THSD4-AS2:1	2139	1	42	0.501293	20.5916	5.36025	Up	8.14e-12	2.32e-10
lnc-SCRIB-1:2	6466	3	123	0.497494	19.9489	5.32549	Up	1.53e-32	1.71e-30
CASC11:7	23949	1	40	0.0447729	1.75155	5.28986	Up	3.04e-11	8.05e-10
lnc-SOX13-3:2	4086	2	80	0.524849	20.5325	5.28986	Up	1.73e-21	1.1e-19
lnc-MAGEA10-3:1	813	1	39	1.3189	50.3066	5.25334	Up	5.88e-11	1.5e-09
lnc-ANXA10-4:1	3053	2	75	0.702435	25.7623	5.19676	Up	4.62e-20	2.7e-18
lnc-CCDC170-4:1	2346	13	478	5.9418	213.673	5.16836	Up	3.75e-121	2.85e-118
LINC00930:1	14080	11	396	0.837708	29.4946	5.13786	Up	2.52e-100	1.38e-97
lnc-RASA1-15:1	738	3	107	4.35881	152.047	5.12444	Up	5.61e-28	5.16e-26
LINC01956:11	10486	3	102	0.306771	10.201	5.0554	Up	1.48e-26	1.26e-24
lnc-CT62-2:1	666	4	134	6.44004	210.999	5.03403	Up	1.87e-34	2.35e-32
lnc-ATG16L2-1:1	368	1	33	2.91377	94.0409	5.01233	Up	3.02e-09	5.98e-08
lnc-IBTK-7:1	227	1	33	4.72364	152.454	5.01233	Up	3.02e-09	5.98e-08
lnc-BOK-1:1	805	1	32	1.33201	41.6874	4.96794	Up	5.81e-09	1.09e-07
lnc-KAT5-2:1	1872	1	32	0.572792	17.9265	4.96794	Up	5.81e-09	1.09e-07
lnc-UBE2R2-1:1	478	1	32	2.24324	70.2058	4.96794	Up	5.81e-09	1.09e-07
lnc-GUF1-7:1	390	1	32	2.7494	86.047	4.96794	Up	5.81e-09	1.09e-07
lnc-HNRNPLL-1:1	1991	1	32	0.538557	16.855	4.96794	Up	5.81e-09	1.09e-07
lnc-SIX1-2:1	1257	1	31	0.853036	25.8629	4.92213	Up	1.12e-08	2e-07
lnc-PIK3C3-15:1	2199	1	31	0.487615	14.7838	4.92213	Up	1.12e-08	2e-07
lnc-CDC6-1:1	1453	4	120	2.95187	86.6096	4.87483	Up	1.72e-30	1.75e-28
MAPT-IT1:1	3016	1	30	0.355526	10.4314	4.87483	Up	2.14e-08	3.66e-07
lnc-PCNX2-7:1	507	1	30	2.11492	62.0532	4.87483	Up	2.14e-08	3.66e-07
lnc-COL28A1-2:1	641	1	30	1.6728	49.081	4.87483	Up	2.14e-08	3.65e-07
lnc-PCM1-4:14	3824	3	88	0.841213	24.1332	4.84241	Up	1.36e-22	9.32e-21
lnc-FAM110C-1:3	3470	8	234	2.47208	70.7191	4.8383	Up	4.83e-58	1.22e-55
lnc-MRPS30-2:1	668	1	29	1.60519	45.5273	4.82592	Up	4.11e-08	6.66e-07
lnc-SERPINB3-7:1	989	2	58	2.16839	61.501	4.82592	Up	3.08e-15	1.23e-13
lnc-ITGB8-5:1	1464	2	57	1.46484	40.8305	4.80083	Up	5.9e-15	2.27e-13
lnc-IZUMO2-2:3	1406	1	28	0.762636	20.8845	4.77529	Up	7.87e-08	1.21e-06
lnc-EML1-3:4	516	1	28	2.07804	56.9061	4.77529	Up	7.87e-08	1.21e-06
lnc-PTOV1-1:2	421	1	27	2.54695	67.2562	4.72282	Up	1.51e-07	2.22e-06
lnc-ISM1-3:1	2200	1	27	0.487394	12.8704	4.72282	Up	1.51e-07	2.23e-06
lnc-TDRKH-1:2	390	1	27	2.7494	72.6022	4.72282	Up	1.51e-07	2.22e-06
lnc-FZD4-4:1	514	1	27	2.08612	55.0873	4.72282	Up	1.51e-07	2.22e-06
lnc-AHCY-7:1	3240	2	51	0.661893	16.5073	4.64036	Up	2.87e-13	9.6e-12
lnc-DYNAP-1:2	1100	2	50	1.94958	47.6681	4.61179	Up	5.47e-13	1.77e-11
lnc-IL17RA-36:33	1067	1	25	1.00494	24.5712	4.61179	Up	5.5e-07	7.27e-06
lnc-TRPC4-2:1	1735	3	75	1.85406	45.3328	4.61179	Up	6.1e-19	3.33e-17
lnc-GRM5-1:3	755	1	24	1.42022	33.3361	4.5529	Up	1.05e-06	1.32e-05
lnc-HRASLS-2:3	5170	1	24	0.207402	4.86823	4.5529	Up	1.05e-06	1.31e-05
lnc-MPP4-1:3	759	2	47	2.82547	64.9392	4.52253	Up	3.77e-12	1.12e-10
lnc-ADAMTS15-2:4	14600	16	369	1.17509	26.5048	4.49541	Up	5.61e-87	2.43e-84
lnc-MUL1-3:1	812	5	115	6.60263	148.523	4.4915	Up	5.33e-28	4.92e-26
lnc-IDNK-3:4	5698	1	23	0.188183	4.23308	4.4915	Up	2e-06	2.37e-05
lnc-MEGF11-1:2	4766	1	23	0.224982	5.06086	4.4915	Up	2e-06	2.37e-05
lnc-PAX8-5:1	311	1	23	3.4478	77.5565	4.4915	Up	2e-06	2.37e-05
MIR924HG:11	9688	4	92	0.442719	9.95874	4.4915	Up	1.22e-22	8.41e-21
VLDLR-AS1:21	8353	2	46	0.256738	5.77519	4.4915	Up	7.17e-12	2.05e-10
LINC01515:32	5551	4	91	0.772665	17.1918	4.47573	Up	2.32e-22	1.58e-20
lnc-MARCH3-3:2	748	2	45	2.86702	63.0901	4.45979	Up	1.36e-11	3.76e-10
lnc-N4BP2L2-2:9	273	2	45	7.85543	172.862	4.45979	Up	1.36e-11	3.75e-10
lnc-FRMD3-5:1	2847	44	984	16.5717	362.458	4.45102	Up	6.19e-228	1.13e-224
lnc-SHANK2-1:8	4401	3	67	0.730925	15.9652	4.44906	Up	1.04e-16	4.79e-15
lnc-THBS1-5:1	851	3	67	3.78002	82.565	4.44906	Up	1.04e-16	4.78e-15
lnc-ACAN-2:1	810	5	111	6.61893	143.711	4.44042	Up	6.88e-27	6.09e-25
lnc-RNF26-1:14	6931	1	22	0.154706	3.32872	4.42737	Up	3.8e-06	4.21e-05
lnc-RGPD6-3:1	755	1	22	1.42022	30.5581	4.42737	Up	3.8e-06	4.21e-05
lnc-FTH1-1:1	562	1	22	1.90795	41.0523	4.42737	Up	3.8e-06	4.21e-05
lnc-NUDT2-3:1	2086	1	22	0.51403	11.0601	4.42737	Up	3.8e-06	4.21e-05
lnc-ZPBP2-4:1	2453	6	131	2.62275	56.0047	4.4164	Up	2.08e-31	2.19e-29
lnc-HIST1H3D-1:1	1865	8	172	4.59953	96.7164	4.3942	Up	1.03e-40	1.62e-38
lnc-C16orf46-1:1	773	1	21	1.38715	28.4899	4.36025	Up	7.22e-06	7.49e-05
lnc-ZNF627-2:15	3501	2	42	0.612549	12.5808	4.36025	Up	9.27e-11	2.3e-09
lnc-MRPS6-6:1	2253	1	21	0.475928	9.77482	4.36025	Up	7.22e-06	7.49e-05
lnc-NDUFAF5-4:1	3972	2	42	0.539913	11.089	4.36025	Up	9.27e-11	2.3e-09
lnc-IBTK-6:1	1424	3	63	2.25899	46.3961	4.36025	Up	1.34e-15	5.52e-14
ATP6V0E2-AS1:2	291	1	21	3.68476	75.6793	4.36025	Up	7.22e-06	7.49e-05
lnc-ZNF729-5:1	574	1	21	1.86806	38.367	4.36025	Up	7.22e-06	7.5e-05
lnc-TRH-4:1	3208	2	41	0.668495	13.4029	4.32549	Up	1.75e-10	4.2e-09
LINC01036:28	6902	22	447	3.41783	67.9177	4.31264	Up	2.52e-102	1.46e-99
lnc-TEKT4-21:1	206	2	40	10.4104	203.631	4.28986	Up	3.32e-10	7.71e-09
lnc-OMD-1:1	483	1	20	2.22001	43.4244	4.28986	Up	1.37e-05	0.00013193
lnc-LRAT-1:2	1776	1	20	0.603754	11.8097	4.28986	Up	1.37e-05	0.000131745
lnc-DERA-2:1	603	1	20	1.77822	34.7827	4.28986	Up	1.37e-05	0.000131838
lnc-XPO4-1:2	367	1	20	2.92171	57.1498	4.28986	Up	1.37e-05	0.000131884
lnc-PRMT8-4:1	686	1	20	1.56307	30.5743	4.28986	Up	1.37e-05	0.000131791
KCTD21-AS1:25	18728	2	40	0.114509	2.23985	4.28986	Up	3.32e-10	7.71e-09
lnc-CTSK-2:2	597	1	20	1.79609	35.1323	4.28986	Up	1.37e-05	0.000131698
lnc-PTBP3-8:3	1110	1	20	0.966006	18.8955	4.28986	Up	1.37e-05	0.000131977
lnc-GATA3-16:1	2413	5	98	2.22185	42.5911	4.26072	Up	2.7e-23	1.92e-21
lnc-PPM1E-4:1	286	2	39	7.49837	143.004	4.25334	Up	6.26e-10	1.39e-08
lnc-HHLA1-3:1	5753	14	273	2.60937	49.7644	4.25334	Up	1.68e-62	4.65e-60
lnc-MAK-1:6	3102	2	39	0.691339	13.1848	4.25334	Up	6.26e-10	1.39e-08
LINC00607:1	18176	7	135	0.412955	7.78908	4.2374	Up	1.64e-31	1.75e-29
lnc-PGR-3:6	3602	14	269	4.16761	78.3176	4.23204	Up	2.11e-61	5.71e-59
lnc-ISG15-5:1	402	1	19	2.66733	49.5653	4.21586	Up	2.59e-05	0.000231888
lnc-GIMAP5-6:1	360	1	19	2.97852	55.348	4.21586	Up	2.59e-05	0.000231737
lnc-FRMPD2-3:7	1963	6	114	3.27743	60.9025	4.21586	Up	1.02e-26	8.85e-25
lnc-BCKDK-1:1	543	1	19	1.97471	36.6948	4.21586	Up	2.59e-05	0.000231964
lnc-THUMPD3-13:1	1188	1	19	0.902581	16.7721	4.21586	Up	2.59e-05	0.00023204
lnc-PPP1R9A-1:1	1584	2	38	1.35387	25.1582	4.21586	Up	1.18e-09	2.52e-08
lnc-ENDOU-6:1	555	1	19	1.93201	35.9014	4.21586	Up	2.59e-05	0.000232116
lnc-ASAP2-5:2	1898	1	19	0.564945	10.498	4.21586	Up	2.59e-05	0.000231812
lnc-RNF144A-4:1	321	3	57	10.0212	186.217	4.21586	Up	6.04e-14	2.14e-12
lnc-TANGO6-2:1	916	48	903	56.1886	1033.82	4.20156	Up	1.61e-201	2.45e-198
lnc-ITGB8-4:1	1904	13	242	7.32115	133.29	4.18636	Up	5.53e-55	1.29e-52
lnc-SELENOT-45:6	11131	10	186	0.963315	17.5238	4.18517	Up	1.43e-42	2.37e-40
LINC01535:4	3990	5	93	1.34369	24.4433	4.18517	Up	6.37e-22	4.2e-20
lnc-FN1-6:1	4616	2	37	0.464587	8.40594	4.17739	Up	2.23e-09	4.53e-08
lnc-WASHC5-17:2	844	13	234	16.516	290.753	4.13786	Up	8.51e-53	1.83e-50
lnc-GIN1-5:1	511	1	18	2.09837	36.9405	4.13786	Up	4.89e-05	0.000410942
lnc-NAV1-9:5	2497	1	18	0.429422	7.5597	4.13786	Up	4.89e-05	0.000410816
lnc-C17orf58-1:3	2694	1	18	0.39802	7.00689	4.13786	Up	4.89e-05	0.000410564
lnc-TRA2A-1:4	2413	1	18	0.444371	7.82286	4.13786	Up	4.89e-05	0.000410438
lnc-SNX29-3:1	2712	1	18	0.395378	6.96039	4.13786	Up	4.89e-05	0.000410312
lnc-CYS1-7:1	783	2	36	2.73887	48.216	4.13786	Up	4.19e-09	8.12e-08
lnc-HORMAD1-1:1	779	2	36	2.75293	48.4636	4.13786	Up	4.19e-09	8.13e-08
lnc-ZFYVE9-2:2	568	1	18	1.88779	33.2334	4.13786	Up	4.89e-05	0.000411195
lnc-EPB41L1-3:1	447	1	18	2.39881	42.2295	4.13786	Up	4.89e-05	0.000411068
lnc-TMEM98-4:1	256	2	36	8.37708	147.473	4.13786	Up	4.19e-09	8.12e-08
lnc-SLC25A51-5:2	1250	1	18	0.857813	15.1013	4.13786	Up	4.89e-05	0.00041069
MIR2052HG:3	2125	4	70	2.01838	34.5454	4.09722	Up	1.43e-16	6.49e-15
lnc-CNOT8-4:1	464	2	35	4.62184	79.1044	4.09722	Up	7.87e-09	1.46e-07
lnc-ODR4-3:1	532	3	52	6.04662	102.504	4.08341	Up	1.42e-12	4.37e-11
lnc-STARD13-2:10	3588	4	69	1.19539	20.1673	4.07646	Up	2.68e-16	1.17e-14
lnc-P2RY2-11:1	2813	5	86	1.90591	32.0612	4.07227	Up	5.21e-20	3.02e-18
lnc-CDCA7-1:2	7263	1	17	0.147634	2.45462	4.0554	Up	9.22e-05	0.000714261
lnc-C17orf47-3:1	673	4	68	6.37305	105.961	4.0554	Up	5.01e-16	2.16e-14
lnc-RBP3-2:2	710	1	17	1.51023	25.1097	4.0554	Up	9.22e-05	0.00071325
lnc-ASXL2-5:1	437	1	17	2.4537	40.796	4.0554	Up	9.22e-05	0.000715478
lnc-KLHDC8B-2:1	2217	1	17	0.483657	8.04144	4.0554	Up	9.22e-05	0.000714058
lnc-CCDC89-8:1	497	1	17	2.15748	35.871	4.0554	Up	9.22e-05	0.000713654
lnc-PTER-7:1	1095	1	17	0.979239	16.2812	4.0554	Up	9.22e-05	0.000712846
lnc-ROPN1B-8:1	281	1	17	3.81589	63.4444	4.0554	Up	9.22e-05	0.000715275
lnc-STS-4:1	2103	1	17	0.509875	8.47735	4.0554	Up	9.22e-05	0.000713856
RORB-AS1:6	7000	1	17	0.153181	2.54684	4.0554	Up	9.22e-05	0.000713048
lnc-NRIP3-4:1	525	1	17	2.04241	33.9579	4.0554	Up	9.22e-05	0.000715681
lnc-CDK1-9:1	486	2	34	4.41262	73.3657	4.0554	Up	1.48e-08	2.6e-07
lnc-ZNF583-3:1	465	1	17	2.30595	38.3395	4.0554	Up	9.22e-05	0.000712644
lnc-PDE4DIP-4:1	839	1	17	1.27803	21.249	4.0554	Up	9.22e-05	0.000713452
lnc-TMEM248-4:11	3370	1	17	0.31818	5.29017	4.0554	Up	9.22e-05	0.000715884
lnc-MAX-13:1	413	1	17	2.59629	43.1668	4.0554	Up	9.22e-05	0.000714666
lnc-TP53TG3-5:1	821	1	17	1.30605	21.7148	4.0554	Up	9.22e-05	0.000714463
lnc-BPNT1-2:5	1212	2	34	1.76942	29.4189	4.0554	Up	1.48e-08	2.59e-07
lnc-ROCK2-6:1	523	1	17	2.05022	34.0877	4.0554	Up	9.22e-05	0.000715072
lnc-SLC6A9-2:5	8328	1	17	0.128754	2.14071	4.0554	Up	9.22e-05	0.000714869
lnc-FOXF2-9:1	1551	11	185	7.60473	125.087	4.03989	Up	2.39e-41	3.85e-39
lnc-LMO1-2:1	7736	3	50	0.415822	6.77804	4.02683	Up	4.97e-12	1.45e-10
lnc-ZNF395-6:3	598	3	50	5.37926	87.6838	4.02683	Up	4.97e-12	1.45e-10
lnc-ACER3-1:1	1766	3	49	1.82152	29.0975	3.99768	Up	9.29e-12	2.63e-10
LINC02068:13	18799	6	98	0.342231	5.46691	3.99768	Up	2.36e-22	1.6e-20
lnc-PKP1-1:1	3161	3	49	1.01765	16.2563	3.99768	Up	9.29e-12	2.63e-10
lnc-NDUFC2-1:3	473	6	97	13.6017	215.061	3.98289	Up	4.4e-22	2.92e-20
lnc-APOD-1:1	1684	4	64	2.54695	39.8555	3.96794	Up	6.12e-15	2.34e-13
lnc-SOX5-5:1	4648	3	48	0.692082	10.8299	3.96794	Up	1.74e-11	4.74e-10
lnc-ZNF713-3:5	503	2	32	4.26348	66.7164	3.96794	Up	5.18e-08	8.24e-07
lnc-MSR1-7:4	1677	2	32	1.27879	20.0109	3.96794	Up	5.18e-08	8.25e-07
lnc-PRDM2-7:1	2948	5	79	1.81863	28.1028	3.94979	Up	4.14e-18	2.12e-16
lnc-THEMIS-1:1	1828	9	142	5.27921	81.4634	3.94776	Up	1.54e-31	1.65e-29
lnc-LRP11-1:3	364	4	63	11.7831	181.505	3.94522	Up	1.14e-14	4.27e-13
lnc-LRRC52-7:1	715	10	157	14.9967	230.274	3.94063	Up	1.1e-34	1.41e-32
LINC00683:3	9652	3	47	0.333278	5.10659	3.93756	Up	3.24e-11	8.55e-10
lnc-HIST3H2A-1:1	1085	2	31	1.97653	29.9628	3.92213	Up	9.68e-08	1.45e-06
lnc-MAP7-1:2	1195	2	31	1.79459	27.2047	3.92213	Up	9.68e-08	1.45e-06
lnc-MANSC1-1:1	1536	2	31	1.39618	21.1651	3.92213	Up	9.68e-08	1.45e-06
lnc-ECHDC1-4:1	3574	4	62	1.20007	18.1923	3.92213	Up	2.13e-14	7.79e-13
lnc-MSLN-2:4	2952	2	31	0.726468	11.0128	3.92213	Up	9.68e-08	1.45e-06
lnc-PIK3C3-14:1	6426	15	231	2.50296	37.6983	3.91279	Up	4e-50	8.04e-48
lnc-CPEB4-5:2	1992	6	92	3.22972	48.4339	3.90654	Up	9.88e-21	6.03e-19
lnc-FAM230A-5:1	376	3	46	8.55532	128.298	3.90654	Up	6.04e-11	1.54e-09
lnc-CSNK1A1-1:4	3919	2	30	0.547214	8.0278	3.87483	Up	1.8e-07	2.58e-06
LINC01883:8	1068	4	60	4.01598	58.9156	3.87483	Up	7.36e-14	2.59e-12
lnc-PRM1-2:1	1095	2	30	1.95848	28.7315	3.87483	Up	1.8e-07	2.58e-06
lnc-ANKRD36-4:1	2529	2	30	0.847977	12.4401	3.87483	Up	1.8e-07	2.58e-06
lnc-FAM174B-1:6	10387	6	89	0.61939	8.98567	3.85871	Up	6.34e-20	3.66e-18
lnc-MACC1-1:11	4891	4	59	0.87693	12.6504	3.85058	Up	1.37e-13	4.68e-12
lnc-LMX1A-7:1	810	27	397	35.7422	513.992	3.84604	Up	5.45e-84	2.26e-81
lnc-NANOGP8-3:5	5496	3	44	0.585298	8.39569	3.84241	Up	2.09e-10	4.99e-09
lnc-SOX11-1:5	4615	6	88	1.39406	19.9968	3.84241	Up	1.18e-19	6.67e-18
lnc-FTO-7:2	10331	13	187	1.34929	18.9823	3.81439	Up	4.36e-40	6.63e-38
lnc-PRDX2-3:9	973	3	43	3.30606	46.3454	3.80924	Up	3.88e-10	8.89e-09
FIRRE:12	8415	3	43	0.38227	5.35877	3.80924	Up	3.88e-10	8.88e-09
GATA2-AS1:5	13882	4	57	0.308966	4.30599	3.80083	Up	4.71e-13	1.54e-11
lnc-NR1D1-4:1	552	8	114	15.5401	216.579	3.80083	Up	6.79e-25	5.29e-23
lnc-NBAS-15:1	1646	6	83	3.90863	52.8809	3.75801	Up	2.56e-18	1.34e-16
lnc-BRF1-31:9	414	5	69	12.9501	174.783	3.75453	Up	2.02e-15	8.16e-14
lnc-ZNF681-241:1	2291	4	55	1.87214	25.1761	3.7493	Up	1.62e-12	4.95e-11
lnc-TASP1-10:1	1258	3	41	2.55707	34.1786	3.74053	Up	1.33e-09	2.8e-08
lnc-GATA3-7:3	1738	5	68	3.08477	41.0308	3.73347	Up	3.73e-15	1.46e-13
lnc-NR2E3-9:1	1652	5	68	3.24536	43.1668	3.73347	Up	3.73e-15	1.46e-13
lnc-DYNLL2-6:1	291	2	27	7.36953	97.3019	3.72282	Up	1.16e-06	1.44e-05
lnc-SMIM18-5:1	497	2	27	4.31496	56.9715	3.72282	Up	1.16e-06	1.44e-05
lnc-PRPF18-14:1	1492	2	27	1.43735	18.9778	3.72282	Up	1.16e-06	1.44e-05
lnc-TBX5-4:2	494	5	67	10.8529	142.232	3.7121	Up	6.88e-15	2.61e-13
ZFAS1:29	847	5	66	6.32979	81.7168	3.6904	Up	1.27e-14	4.72e-13
LINC00862:3	1417	3	39	2.27015	28.8633	3.66838	Up	4.55e-09	8.78e-08
lnc-ZNF726-4:1	1747	5	65	3.06888	39.0185	3.66838	Up	2.34e-14	8.55e-13
lnc-IPO5-10:3	510	2	26	4.20497	53.4631	3.66838	Up	2.14e-06	2.53e-05
lnc-MAP1LC3B2-28:16	2715	2	26	0.789883	10.0428	3.66838	Up	2.14e-06	2.53e-05
lnc-PPP1R3D-6:1	579	7	90	12.9635	163.01	3.65243	Up	2.39e-19	1.34e-17
lnc-TACR3-2:1	3301	12	154	3.89797	48.9244	3.64976	Up	3.69e-32	4.06e-30
lnc-TM4SF1-3:1	615	11	140	19.1787	238.728	3.63779	Up	2.76e-29	2.71e-27
lnc-PDGFRL-4:1	688	5	63	7.79263	96.0291	3.62329	Up	7.92e-14	2.77e-12
lnc-HAPLN3-2:1	500	7	88	15.0117	184.571	3.62001	Up	8.07e-19	4.37e-17
lnc-ALDH1A3-1:19	1175	9	113	8.2131	100.854	3.61819	Up	8.57e-24	6.3e-22
lnc-RPS27L-1:1	691	13	163	20.1729	247.377	3.61622	Up	1.03e-33	1.24e-31
lnc-VCPIP1-4:1	1565	2	25	1.37031	16.7524	3.61179	Up	3.96e-06	4.36e-05
lnc-PEBP1-1:1	1730	2	25	1.23961	15.1546	3.61179	Up	3.96e-06	4.36e-05
lnc-EML1-4:1	506	2	25	4.23821	51.8132	3.61179	Up	3.96e-06	4.36e-05
lnc-ATF7IP2-4:1	641	2	25	3.34561	40.9009	3.61179	Up	3.96e-06	4.36e-05
lnc-NR5A2-7:1	1678	4	50	2.55606	31.2485	3.61179	Up	3.45e-11	9.06e-10
lnc-PTGDR-3:1	999	2	25	2.14668	26.2437	3.61179	Up	3.96e-06	4.36e-05
lnc-DCAF13-2:1	4285	4	50	1.00095	12.2369	3.61179	Up	3.45e-11	9.05e-10
lnc-PDE4D-7:3	580	3	37	5.54621	66.8997	3.59243	Up	1.54e-08	2.71e-07
lnc-MDH1B-1:1	1105	3	37	2.91113	35.1148	3.59243	Up	1.54e-08	2.7e-07
lnc-NAA38-2:1	783	3	37	4.1083	49.5554	3.59243	Up	1.54e-08	2.7e-07
lnc-INTS12-2:1	1045	3	37	3.07828	37.1309	3.59243	Up	1.54e-08	2.71e-07
lnc-HPGDS-7:1	5092	58	713	12.2136	146.842	3.58771	Up	1.76e-141	1.78e-138
lnc-EIF3H-3:1	564	48	583	91.2567	1084.03	3.57033	Up	1.6e-115	1.06e-112
lnc-ATG10-2:2	2511	2	24	0.854055	10.0234	3.5529	Up	7.29e-06	7.54e-05
lnc-ARMCX6-3:4	889	2	24	2.4123	28.3113	3.5529	Up	7.29e-06	7.55e-05
lnc-IRF2BP2-1:1	3564	2	24	0.601721	7.06194	3.5529	Up	7.29e-06	7.54e-05
lnc-RIC8A-2:1	1100	2	24	1.94958	22.8807	3.5529	Up	7.29e-06	7.55e-05
lnc-CDK12-1:6	436	3	36	7.37798	86.5898	3.5529	Up	2.84e-08	4.75e-07
lnc-GTF2E2-4:1	902	2	24	2.37753	27.9033	3.5529	Up	7.29e-06	7.55e-05
lnc-DLEU7-6:1	1809	3	36	1.77822	20.8696	3.5529	Up	2.84e-08	4.75e-07
lnc-KLHDC7B-3:1	871	6	72	7.38645	86.6892	3.5529	Up	2.1e-15	8.47e-14
TMLHE-AS1:2	1702	2	24	1.26001	14.7878	3.5529	Up	7.29e-06	7.55e-05
lnc-EFCAB13-1:1	283	2	24	7.57785	88.9356	3.5529	Up	7.29e-06	7.56e-05
lnc-PXDN-3:4	2763	11	129	4.26889	48.962	3.51973	Up	2.14e-26	1.8e-24
LINC00346:2	6096	3	35	0.52769	6.02107	3.51226	Up	5.2e-08	8.27e-07
lnc-CCDC159-4:1	906	14	163	16.5692	188.673	3.50931	Up	6.51e-33	7.41e-31
lnc-ZNF25-4:2	1238	2	23	1.73226	19.4831	3.4915	Up	1.34e-05	0.000129514
lnc-ZNF627-2:16	1561	2	23	1.37382	15.4517	3.4915	Up	1.34e-05	0.000129422
lnc-RTP4-3:1	1749	2	23	1.22615	13.7908	3.4915	Up	1.34e-05	0.000129697
lnc-CTAGE1-9:13	4720	2	23	0.45435	5.11018	3.4915	Up	1.34e-05	0.000129652
lnc-NLK-4:1	721	2	23	2.97439	33.4536	3.4915	Up	1.34e-05	0.000129468
lnc-PSMB11-1:7	3008	2	23	0.712943	8.01864	3.4915	Up	1.34e-05	0.000129606
lnc-TYW1-4:1	445	2	23	4.81918	54.2024	3.4915	Up	1.34e-05	0.000129377
lnc-CNNM3-3:1	1771	2	23	1.21092	13.6195	3.4915	Up	1.34e-05	0.000129331
OR2A1-AS1:26	1920	2	23	1.11694	12.5625	3.4915	Up	1.34e-05	0.00012956
lnc-GGPS1-3:1	2784	3	34	1.15546	12.8074	3.47044	Up	9.53e-08	1.43e-06
lnc-RNASEH2B-4:1	1723	3	34	1.86698	20.694	3.47044	Up	9.53e-08	1.43e-06
lnc-TMEM211-4:1	5388	4	45	0.79604	8.75862	3.45979	Up	7.11e-10	1.55e-08
lnc-PCCA-3:1	3067	5	56	1.74807	19.1481	3.45336	Up	5.45e-12	1.58e-10
lnc-PNMT-1:1	849	9	100	11.3668	123.522	3.44187	Up	2.17e-20	1.29e-18
ZNF451-AS1:27	1505	2	22	1.42494	15.3298	3.42737	Up	2.45e-05	0.000224047
lnc-ZNF727-1:1	748	2	22	2.86702	30.8441	3.42737	Up	2.45e-05	0.000223897
lnc-CDC40-3:1	901	2	22	2.38017	25.6064	3.42737	Up	2.45e-05	0.000223972
lnc-MACC1-1:9	516	6	66	12.4682	134.136	3.42737	Up	7.76e-14	2.73e-12
lnc-PIK3C3-12:1	1582	3	33	2.03338	21.8755	3.42737	Up	1.74e-07	2.5e-06
SNHG6:18	648	2	22	3.30946	35.604	3.42737	Up	2.45e-05	0.000223822
lnc-ENOSF1-2:2	7578	3	33	0.424492	4.56678	3.42737	Up	1.74e-07	2.5e-06
lnc-APMAP-1:1	2156	2	22	0.994681	10.701	3.42737	Up	2.45e-05	0.000223748
lnc-MED24-5:1	1003	21	228	22.4502	238.388	3.40851	Up	2.27e-44	4e-42
lnc-ACOX3-5:1	919	8	86	9.3342	98.1372	3.3942	Up	1.62e-17	7.9e-16
lnc-SMIM28-1:1	4427	50	537	12.1105	127.208	3.39286	Up	5.4e-102	3.08e-99
lnc-ZNF391-5:5	5502	3	32	0.58466	6.0993	3.38297	Up	3.17e-07	4.33e-06
lnc-PLD3-4:2	4246	3	32	0.757607	7.90352	3.38297	Up	3.17e-07	4.33e-06
lnc-ABCB10-1:1	1168	3	32	2.75411	28.7315	3.38297	Up	3.17e-07	4.33e-06
lnc-ECHDC1-1:1	3574	5	53	1.50009	15.5515	3.37393	Up	3.28e-11	8.64e-10
lnc-EYS-2:1	1404	2	21	1.52745	15.6857	3.36025	Up	4.48e-05	0.000380149
LINC01394:28	2430	2	21	0.882524	9.06283	3.36025	Up	4.48e-05	0.000379325
lnc-PTPN3-1:1	587	2	21	3.65338	37.5173	3.36025	Up	4.48e-05	0.000379678
lnc-SNX13-2:5	2978	2	21	0.720125	7.39512	3.36025	Up	4.48e-05	0.00037956
lnc-TMEM65-1:4	3537	2	21	0.606314	6.22637	3.36025	Up	4.48e-05	0.000379443
lnc-RPRML-3:20	2291	2	21	0.936069	9.61269	3.36025	Up	4.48e-05	0.000380031
lnc-ALPK2-4:2	875	2	21	2.45089	25.1688	3.36025	Up	4.48e-05	0.000379913
lnc-ZNF732-9:1	1207	2	21	1.77675	18.2458	3.36025	Up	4.48e-05	0.000379208
lnc-SOD2-2:1	1638	2	21	1.30924	13.4449	3.36025	Up	4.48e-05	0.000379795
DANT1:2	15329	15	156	1.04925	10.6724	3.34645	Up	2.47e-30	2.49e-28
lnc-MEI4-10:1	9450	3	31	0.340402	3.44017	3.33717	Up	5.76e-07	7.59e-06
NRSN2-AS1:19	11568	3	31	0.278077	2.81031	3.33717	Up	5.76e-07	7.58e-06
lnc-ALDH1A3-2:6	10553	3	31	0.304823	3.08061	3.33717	Up	5.76e-07	7.59e-06
lnc-PIK3R1-4:2	4789	4	41	0.895608	8.97821	3.32549	Up	7.77e-09	1.44e-07
lnc-RPS24-17:2	3898	4	41	1.10032	11.0304	3.32549	Up	7.77e-09	1.44e-07
lnc-TAF3-1:12	442	23	233	55.7967	552.821	3.30856	Up	3.7e-44	6.49e-42
lnc-CH25H-2:4	1179	75	753	68.2103	669.779	3.29562	Up	1.11e-138	1.05e-135
LINC00271:28	3344	4	40	1.28262	12.5442	3.28986	Up	1.41e-08	2.49e-07
lnc-ALOX12B-4:1	659	2	20	3.25422	31.827	3.28986	Up	8.16e-05	0.000643913
lnc-MAPK13-4:1	1405	2	20	1.52636	14.9281	3.28986	Up	8.16e-05	0.000643542
lnc-CDK12-1:13	1471	3	30	2.18681	21.3875	3.28986	Up	1.05e-06	1.31e-05
lnc-VSTM2B-8:1	909	2	20	2.35922	23.0737	3.28986	Up	8.16e-05	0.000644099
lnc-DTNBP1-16:19	18256	9	90	0.528615	5.16996	3.28986	Up	8.23e-18	4.1e-16
lnc-RAD51-2:1	669	2	20	3.20558	31.3512	3.28986	Up	8.16e-05	0.000643727
lnc-PDGFRL-3:1	1377	19	186	14.7953	141.654	3.25917	Up	4.44e-35	5.76e-33
lnc-MRPL47-5:1	3159	9	88	3.05489	29.2135	3.25744	Up	2.67e-17	1.29e-15
lnc-SHANK2-1:5	599	4	39	7.16038	68.2792	3.25334	Up	2.54e-08	4.28e-07
lnc-SH3BP4-11:1	2548	6	58	2.52496	23.8715	3.24095	Up	8.93e-12	2.53e-10
lnc-RNF43-1:1	497	13	125	28.0472	263.757	3.23328	Up	7.25e-24	5.36e-22
LINC00621:3	12723	4	38	0.337111	3.13217	3.21586	Up	4.58e-08	7.34e-07
lnc-UTP23-10:1	546	13	123	25.5302	236.245	3.21001	Up	2.33e-23	1.67e-21
lnc-HIST4H4-5:5	957	5	47	5.60223	51.5035	3.2006	Up	1.14e-09	2.44e-08
lnc-GLYAT-2:1	4176	23	216	5.90568	54.243	3.19926	Up	7.81e-40	1.17e-37
lnc-GSTO2-3:1	2743	3	28	1.17273	10.7049	3.19033	Up	3.41e-06	3.82e-05
lnc-LY6E-1:1	1332	3	28	2.41501	22.0447	3.19033	Up	3.41e-06	3.81e-05
lnc-IFT74-9:1	4104	3	28	0.783821	7.15486	3.19033	Up	3.41e-06	3.81e-05
lnc-CROCC-2:2	2020	3	28	1.59247	14.5364	3.19033	Up	3.41e-06	3.81e-05
lnc-ZDHHC11B-1:1	2733	6	56	2.35404	21.4881	3.19033	Up	2.89e-11	7.67e-10
lnc-LIPH-2:1	743	15	139	21.6474	196.19	3.17999	Up	5.3e-26	4.42e-24
lnc-BABAM2-2:1	296	4	37	14.4901	131.087	3.17739	Up	8.25e-08	1.27e-06
lnc-GFM1-7:1	549	7	64	13.6719	122.253	3.16058	Up	1.32e-12	4.11e-11
lnc-POTEH-2:1	3707	31	283	8.96689	80.0598	3.1584	Up	4.07e-51	8.56e-49
lnc-ATIC-10:1	773	8	73	11.0972	99.0362	3.15776	Up	3.42e-14	1.24e-12
lnc-SOCS2-3:1	994	14	127	15.1023	133.989	3.14927	Up	1.14e-23	8.27e-22
lnc-PCED1B-11:2	1216	3	27	2.64539	23.2852	3.13786	Up	6.14e-06	6.52e-05
lnc-ARL14-2:1	998	3	27	3.22325	28.3716	3.13786	Up	6.14e-06	6.53e-05
lnc-POU5F1B-12:1	1768	4	36	2.42594	21.3536	3.13786	Up	1.48e-07	2.19e-06
lnc-GFM1-6:1	1087	3	27	2.95934	26.0486	3.13786	Up	6.14e-06	6.52e-05
lnc-CHSY1-5:15	473	6	54	13.6017	119.725	3.13786	Up	9.26e-11	2.3e-09
lnc-ESR2-1:2	1751	3	27	1.83712	16.1707	3.13786	Up	6.14e-06	6.52e-05
lnc-ARHGEF10L-1:1	3276	7	62	2.29117	19.8472	3.11478	Up	4.23e-12	1.25e-10
lnc-NOP56-1:4	6012	5	44	0.891772	7.6751	3.10544	Up	6.56e-09	1.23e-07
MAGI1-AS1:1	591	9	79	16.3289	140.181	3.10179	Up	5.06e-15	1.96e-13
lnc-ALPK1-4:1	749	4	35	5.72639	49.0046	3.09722	Up	2.65e-07	3.69e-06
lnc-ABHD12-1:7	7601	3	26	0.423207	3.58718	3.08341	Up	1.1e-05	0.000108971
lnc-SPOCK2-2:3	521	3	26	6.17428	52.3343	3.08341	Up	1.1e-05	0.000108931
lnc-AGT-6:9	16691	5	43	0.321211	2.7017	3.07227	Up	1.17e-08	2.09e-07
lnc-FAM160A1-1:3	5505	14	120	2.72693	22.8599	3.06747	Up	6.45e-22	4.24e-20
lnc-MARVELD3-5:1	2398	9	77	4.02435	33.6738	3.0648	Up	1.6e-14	5.94e-13
LINC01106:11	2629	11	93	4.48647	37.0974	3.04766	Up	3.48e-17	1.66e-15
lnc-MOAP1-2:1	1108	5	42	4.83875	39.7521	3.03833	Up	2.09e-08	3.58e-07
lnc-ZPBP2-5:1	2053	28	235	14.6242	120.041	3.0371	Up	3.61e-41	5.74e-39
lnc-KIN-10:1	3350	77	644	24.6461	201.601	3.03207	Up	7.17e-110	4.35e-107
lnc-RSF1-1:1	1280	3	25	2.51312	20.4824	3.02683	Up	1.97e-05	0.000181774
lnc-STRC-5:1	596	3	25	5.39731	43.989	3.02683	Up	1.97e-05	0.000181897
SOCS2-AS1:21	1480	9	75	6.52054	53.1435	3.02683	Up	5.05e-14	1.8e-12
lnc-CPT1A-1:1	289	3	25	11.1308	90.7179	3.02683	Up	1.97e-05	0.000181959
lnc-NR1I2-1:15	4246	6	50	1.51521	12.3493	3.02683	Up	9.35e-10	2.02e-08
lnc-LGALS7-1:1	2552	3	25	1.2605	10.2733	3.02683	Up	1.97e-05	0.000181836
lnc-PTGS1-1:3	708	4	33	6.058	48.88	3.01233	Up	8.43e-07	1.07e-05
lnc-UTP23-10:2	791	43	354	58.2901	469.329	3.00928	Up	1.08e-60	2.87e-58
lnc-GSDMB-1:1	349	5	41	15.362	123.2	3.00356	Up	3.71e-08	6.09e-07
lnc-MYO9A-4:1	585	5	41	9.16467	73.4985	3.00356	Up	3.71e-08	6.09e-07
lnc-CABP4-2:1	446	6	49	14.4251	115.216	2.99768	Up	1.66e-09	3.44e-08
lnc-PDLIM3-6:2	1575	26	212	17.7009	141.158	2.99542	Up	8.47e-37	1.15e-34
lnc-LRRC52-9:1	1864	37	299	21.2843	168.219	2.98248	Up	4.62e-51	9.64e-49
lnc-CHST10-2:1	6696	42	339	6.72569	53.0927	2.98076	Up	1.19e-57	2.94e-55
lnc-ARHGAP21-3:1	571	15	121	28.1681	222.229	2.97991	Up	1.66e-21	1.05e-19
LINC00571:11	4007	4	32	1.07039	8.37493	2.96794	Up	1.5e-06	1.82e-05
lnc-HSF4-1:1	578	5	40	9.27566	72.5743	2.96794	Up	6.57e-08	1.03e-06
lnc-BEST3-3:1	1559	5	40	3.43896	26.907	2.96794	Up	6.57e-08	1.03e-06
lnc-C4orf46-4:1	584	12	96	22.0329	172.389	2.96794	Up	2.81e-17	1.35e-15
lnc-SGMS1-5:1	5930	8	64	1.44657	11.3182	2.96794	Up	6.08e-12	1.75e-10
lnc-TRABD2B-4:2	540	13	103	25.8138	200.03	2.954	Up	2.32e-18	1.22e-16
lnc-SLC25A26-4:1	1253	11	87	9.41335	72.8147	2.95145	Up	1.06e-15	4.46e-14
NRIR:4	2954	22	173	7.98574	61.4167	2.94313	Up	8.59e-30	8.51e-28
GATA2-AS1:17	14898	6	47	0.431843	3.30842	2.93756	Up	5.19e-09	9.86e-08
lnc-TFB1M-5:5	578	5	39	9.27566	70.7599	2.93141	Up	1.16e-07	1.73e-06
lnc-GATA3-7:4	1491	18	140	12.9449	98.4693	2.92729	Up	2.96e-24	2.23e-22
LINC00885:8	10393	9	70	0.928548	7.0633	2.92729	Up	8.7e-13	2.75e-11
lnc-MAST2-1:1	649	4	31	6.60873	50.0919	2.92213	Up	2.65e-06	3.05e-05
lnc-ABLIM2-4:1	624	4	31	6.8735	52.0988	2.92213	Up	2.65e-06	3.05e-05
lnc-LBR-4:2	584	4	31	7.34429	55.6672	2.92213	Up	2.65e-06	3.04e-05
lnc-PLSCR2-3:1	340	8	62	25.2298	191.233	2.92213	Up	1.89e-11	5.14e-10
GAS5:73	1062	4	31	4.03867	30.6117	2.92213	Up	2.65e-06	3.04e-05
NRSN2-AS1:17	2593	3	23	1.24057	9.30199	2.90654	Up	6.22e-05	0.000506408
lnc-EPB41L1-1:4	6715	3	23	0.479047	3.59197	2.90654	Up	6.22e-05	0.000506257
lnc-WARS-3:1	675	3	23	4.76563	35.7334	2.90654	Up	6.22e-05	0.000506107
lnc-P2RY6-1:2	4248	6	46	1.5145	11.356	2.90654	Up	9.15e-09	1.67e-07
RDH10-AS1:1	3261	14	107	4.60341	34.4099	2.90205	Up	1.04e-18	5.58e-17
lnc-MRPL3-2:13	8844	11	84	1.33366	9.9605	2.90082	Up	5.78e-15	2.23e-13
lnc-CRACR2A-8:1	19208	5	38	0.27912	2.07468	2.89394	Up	2.05e-07	2.9e-06
lnc-ABCB5-7:1	1090	7	53	6.88611	50.9918	2.8885	Up	7.28e-10	1.59e-08
lnc-GATA3-25:1	2102	20	151	10.2023	75.3347	2.88441	Up	1.11e-25	9.07e-24
lnc-NNT-2:6	4125	11	83	2.85938	21.1011	2.88354	Up	1.01e-14	3.82e-13
lnc-DUSP4-9:1	456	4	30	9.40585	68.9933	2.87483	Up	4.68e-06	5.09e-05
lnc-GPATCH2-6:2	3171	5	37	1.69074	12.2365	2.85546	Up	3.61e-07	4.9e-06
lnc-NPY4R2-6:1	780	5	37	6.8735	49.746	2.85546	Up	3.61e-07	4.9e-06
lnc-LRCH1-6:1	401	11	81	29.4138	211.832	2.84835	Up	3.11e-14	1.13e-12
lnc-ARHGDIB-4:1	582	11	81	20.2662	145.953	2.84835	Up	3.11e-14	1.13e-12
lnc-FAM49A-2:1	840	3	22	3.82952	27.4659	2.84241	Up	0.000110014	0.000828726
lnc-GRM1-6:1	585	6	44	10.9976	78.8765	2.84241	Up	2.83e-08	4.74e-07
lnc-NVL-2:1	638	3	22	5.04201	36.162	2.84241	Up	0.000110014	0.000829412
lnc-IRF1-4:1	916	3	22	3.51179	25.1871	2.84241	Up	0.000110014	0.000828498
lnc-FAM71F2-4:1	1267	6	44	5.07782	36.4189	2.84241	Up	2.83e-08	4.73e-07
lnc-PCDHB2-1:1	2542	3	22	1.26546	9.07607	2.84241	Up	0.000110014	0.00082987
lnc-STK24-3:1	508	3	22	6.33228	45.4161	2.84241	Up	0.000110014	0.000828955
lnc-PGPEP1L-3:1	3910	3	22	0.822711	5.9006	2.84241	Up	0.000110014	0.000829183
lnc-NOCT-18:2	2281	3	22	1.41026	10.1146	2.84241	Up	0.000110014	0.000829641
lnc-DTWD1-1:1	4094	6	44	1.57147	11.2708	2.84241	Up	2.83e-08	4.73e-07
lnc-C15orf40-4:1	648	4	29	6.61893	46.9325	2.82592	Up	8.24e-06	8.4e-05
lnc-B3GNT10-4:2	1268	4	29	3.38254	23.9844	2.82592	Up	8.24e-06	8.39e-05
lnc-COL28A1-1:18	6729	4	29	0.6374	4.51958	2.82592	Up	8.24e-06	8.39e-05
LINC01948:13	1165	4	29	3.6816	26.1049	2.82592	Up	8.24e-06	8.39e-05
lnc-NCL-32:1	1843	4	29	2.32722	16.5015	2.82592	Up	8.24e-06	8.4e-05
lnc-LEKR1-5:3	1150	5	36	4.66203	32.8288	2.81593	Up	6.33e-07	8.21e-06
lnc-MGMT-13:1	568	5	36	9.43897	66.4668	2.81593	Up	6.33e-07	8.2e-06
lnc-HAPLN3-3:1	611	51	366	89.5018	628.189	2.81121	Up	1.44e-58	3.71e-56
lnc-ADAM2-1:1	605	6	43	10.634	74.5356	2.80924	Up	4.95e-08	7.9e-07
lnc-ORMDL3-1:1	616	13	93	22.629	158.326	2.80666	Up	6.33e-16	2.71e-14
lnc-ANKRD30B-2:4	1457	7	50	5.15159	35.9883	2.80444	Up	3.92e-09	7.62e-08
MIR31HG:6	28268	7	50	0.265525	1.85492	2.80444	Up	3.92e-09	7.61e-08
lnc-ATAD2-2:1	1669	18	128	11.5643	80.4274	2.79801	Up	2.41e-21	1.51e-19
lnc-ZSCAN20-4:1	2712	4	28	1.58151	10.8273	2.77529	Up	1.44e-05	0.000138455
lnc-RGMA-19:3	19924	7	49	0.376725	2.57911	2.77529	Up	6.83e-09	1.27e-07
lnc-POTEI-2:11	3992	14	98	3.76045	25.7446	2.77529	Up	1.57e-16	7.11e-15
lnc-PPP1R3D-5:1	584	19	133	34.8854	238.83	2.77529	Up	6.01e-22	3.97e-20
lnc-IRX3-8:1	7112	4	28	0.603075	4.12873	2.77529	Up	1.44e-05	0.000138406
lnc-COMMD5-2:1	1239	4	28	3.46172	23.6994	2.77529	Up	1.44e-05	0.000138358
lnc-SERPING1-2:1	415	8	56	20.6702	141.511	2.77529	Up	5.45e-10	1.22e-08
lnc-IFT81-4:1	2342	11	77	5.03626	34.479	2.77529	Up	2.87e-13	9.6e-12
lnc-RNASE1-2:2	9655	8	56	0.888465	6.08256	2.77529	Up	5.45e-10	1.22e-08
lnc-BCL2L10-2:2	4755	4	28	0.902012	6.1753	2.77529	Up	1.44e-05	0.000138261
lnc-TMEM144-3:2	1049	5	35	5.1109	34.9899	2.77529	Up	1.11e-06	1.38e-05
lnc-CXADR-2:1	2633	4	28	1.62897	11.1521	2.77529	Up	1.44e-05	0.00013831
lnc-MCF2-4:1	3629	4	28	1.18189	8.09136	2.77529	Up	1.44e-05	0.000138504
TMLHE-AS1:1	1691	4	28	2.53641	17.3646	2.77529	Up	1.44e-05	0.000138552
lnc-NBN-1:38	2259	34	236	16.1386	109.559	2.76312	Up	1.19e-37	1.66e-35
lnc-GATA3-19:2	677	21	144	33.2609	223.061	2.74554	Up	2.15e-23	1.54e-21
lnc-ZFAT-1:8	23792	5	34	0.225342	1.49864	2.73347	Up	1.93e-06	2.3e-05
lnc-C15orf40-1:1	454	5	34	11.8091	78.5369	2.73347	Up	1.93e-06	2.3e-05
lnc-TARS-2:1	2388	5	34	2.24511	14.9312	2.73347	Up	1.93e-06	2.3e-05
lnc-OCRL-4:7	5260	5	34	1.01926	6.77866	2.73347	Up	1.93e-06	2.3e-05
lnc-ZNF704-1:1	3766	5	34	1.42361	9.4678	2.73347	Up	1.93e-06	2.3e-05
lnc-KIZ-9:2	698	5	34	7.68099	51.0827	2.73347	Up	1.93e-06	2.3e-05
lnc-EIF2AK4-9:1	733	14	95	20.4799	135.916	2.73044	Up	8.18e-16	3.47e-14
lnc-ANKRD26-5:1	1726	4	27	2.48497	16.4049	2.72282	Up	2.52e-05	0.000229705
lnc-TUBGCP4-2:1	519	4	27	8.2641	54.5566	2.72282	Up	2.52e-05	0.000229859
lnc-ARHGAP26-4:12	23147	4	27	0.185297	1.22326	2.72282	Up	2.52e-05	0.000229629
lnc-SLC25A10-1:1	1650	4	27	2.59943	17.1605	2.72282	Up	2.52e-05	0.000229782
lnc-RPS24-2:4	987	18	121	19.555	128.564	2.71687	Up	1.13e-19	6.44e-18
lnc-AEBP2-1:1	2197	7	47	3.41642	22.4346	2.71517	Up	2.06e-08	3.55e-07
lnc-CMC2-2:1	829	7	47	9.05412	59.4558	2.71517	Up	2.06e-08	3.55e-07
lnc-SSH3-5:1	5813	21	140	3.87366	25.2568	2.7049	Up	1.92e-22	1.31e-20
lnc-ZNF316-3:8	8659	28	186	3.46731	22.5266	2.69974	Up	2.74e-29	2.7e-27
lnc-CDK12-1:1	965	8	53	8.88926	57.5969	2.69586	Up	2.85e-09	5.67e-08
lnc-CDK12-1:3	2992	32	212	11.4681	74.3062	2.69586	Up	3.99e-33	4.68e-31
lnc-BST2-2:1	470	5	33	11.4071	73.632	2.6904	Up	3.36e-06	3.76e-05
lnc-SFPQ-2:7	2666	5	33	2.011	12.9809	2.6904	Up	3.36e-06	3.76e-05
lnc-MGMT-2:1	2705	22	145	8.72084	56.2149	2.68841	Up	4.73e-23	3.32e-21
LINC01278:22	2713	7	46	2.76663	17.7811	2.68414	Up	3.58e-08	5.91e-07
lnc-ZNF165-1:3	4801	7	46	1.5634	10.0479	2.68414	Up	3.58e-08	5.9e-07
lnc-ZNF570-2:1	654	9	59	14.756	94.6073	2.68065	Up	3.95e-10	9.04e-09
lnc-PUM3-4:1	1736	4	26	2.47066	15.7063	2.66838	Up	4.39e-05	0.000373567
TMEM51-AS1:6	14350	8	52	0.597779	3.80016	2.66838	Up	4.92e-09	9.44e-08
lnc-AKR1A1-3:1	607	4	26	7.06601	44.9195	2.66838	Up	4.39e-05	0.000373683
lnc-KHNYN-1:3	1923	4	26	2.2304	14.179	2.66838	Up	4.39e-05	0.000373334
lnc-MYO7A-2:1	427	6	39	15.067	95.7828	2.66838	Up	4.53e-07	6.03e-06
lnc-CPSF2-3:1	1990	4	26	2.15531	13.7016	2.66838	Up	4.39e-05	0.000373799
lnc-RBM11-16:1	4869	8	52	1.76179	11.1999	2.66838	Up	4.92e-09	9.43e-08
lnc-ULK2-2:1	3096	4	26	1.38536	8.8069	2.66838	Up	4.39e-05	0.00037345
lnc-LCLAT1-1:1	4255	9	58	2.26801	14.2948	2.65599	Up	6.82e-10	1.49e-08
lnc-SRSF6-5:1	2154	7	45	3.48462	21.9087	2.65243	Up	6.18e-08	9.73e-07
lnc-C17orf47-1:1	1707	5	32	3.14079	19.6593	2.64601	Up	5.82e-06	6.2e-05
LINC01515:39	2563	5	32	2.09182	13.0934	2.64601	Up	5.82e-06	6.2e-05
SCOC-AS1:9	8158	5	32	0.657187	4.11355	2.64601	Up	5.82e-06	6.19e-05
lnc-COL24A1-3:1	628	5	32	8.53715	53.4369	2.64601	Up	5.82e-06	6.2e-05
lnc-TFDP2-1:8	256	5	32	20.9427	131.087	2.64601	Up	5.82e-06	6.2e-05
lnc-PDIA4-3:1	906	10	64	11.8352	74.0802	2.64601	Up	9.49e-11	2.35e-09
lnc-DUSP4-6:1	2103	25	160	12.7469	79.7868	2.64601	Up	7.05e-25	5.48e-23
lnc-LIMS4-8:1	3665	42	268	12.2879	76.6852	2.64171	Up	1.35e-40	2.11e-38
lnc-MZT1-5:1	3092	16	102	5.5486	34.5948	2.64036	Up	2.5e-16	1.1e-14
lnc-CDK12-1:12	984	6	38	6.53821	40.4985	2.6309	Up	7.82e-07	9.93e-06
lnc-RAB43-4:1	1065	12	76	12.0819	74.8367	2.6309	Up	1.86e-12	5.66e-11
lnc-HRK-3:1	2685	4	25	1.59742	9.76442	2.61179	Up	7.61e-05	0.000602459
lnc-GPR27-5:1	2635	4	25	1.62773	9.9497	2.61179	Up	7.61e-05	0.000602809
lnc-RXYLT1-3:2	1541	8	50	5.5666	34.0266	2.61179	Up	1.46e-08	2.57e-07
lnc-ZMYM5-2:1	278	4	25	15.4283	94.3074	2.61179	Up	7.61e-05	0.000602634
lnc-WDR27-1:14	5081	11	68	2.32138	14.0349	2.59597	Up	3.9e-11	1.02e-09
lnc-MAP1LC3B2-28:13	12588	36	221	3.06654	18.4114	2.58591	Up	5.48e-33	6.32e-31
lnc-VPS45-6:1	2533	9	55	3.80987	22.7708	2.57937	Up	3.45e-09	6.78e-08
lnc-ZNF227-1:1	3114	20	122	6.88675	41.0858	2.57675	Up	8.7e-19	4.68e-17
lnc-CSTF1-1:1	247	23	139	99.8467	590.158	2.56332	Up	4.29e-21	2.65e-19
lnc-ITPKB-3:1	599	6	36	10.7406	63.0269	2.5529	Up	2.31e-06	2.71e-05
lnc-SELENBP1-2:1	508	4	24	8.44304	49.5448	2.5529	Up	0.000131224	0.000971897
lnc-ANKRD6-1:8	1892	8	48	4.5339	26.6055	2.5529	Up	4.29e-08	6.93e-07
lnc-ZFP36L1-9:6	3289	4	24	1.30406	7.65241	2.5529	Up	0.000131224	0.000972424
lnc-TNMD-4:1	652	4	24	6.57832	38.6024	2.5529	Up	0.000131224	0.00097216
lnc-NR2E3-6:1	1590	19	114	12.8132	75.1897	2.5529	Up	1.78e-17	8.64e-16
LINC02306:15	8101	5	30	0.661811	3.88359	2.5529	Up	1.73e-05	0.000162263
lnc-SERAC1-7:2	2552	6	36	2.521	14.7936	2.5529	Up	2.31e-06	2.71e-05
lnc-BCL2L10-6:1	630	5	30	8.51005	49.938	2.5529	Up	1.73e-05	0.000162319
lnc-MBOAT2-2:1	1557	14	83	9.64145	55.9036	2.53562	Up	5.34e-13	1.73e-11
lnc-SERAC1-9:1	244	12	71	52.7344	305.154	2.53272	Up	2.71e-11	7.25e-10
lnc-MRPL3-2:11	23964	75	443	3.35587	19.3863	2.53028	Up	5.2e-63	1.47e-60
lnc-TYRO3-3:1	333	9	53	28.9802	166.91	2.52593	Up	1.01e-08	1.84e-07
lnc-CLEC18B-5:2	473	5	29	11.3347	64.2965	2.50399	Up	2.96e-05	0.000261734
lnc-CASP9-7:2	441	5	29	12.1572	68.962	2.50399	Up	2.96e-05	0.000261819
TRG-AS1:19	763	9	52	12.648	71.4709	2.49845	Up	1.71e-08	2.98e-07
lnc-ATP6AP1L-3:1	1040	7	40	7.21718	40.3346	2.48251	Up	9.12e-07	1.15e-05
lnc-NEIL3-9:1	3527	18	102	5.4723	30.3281	2.47044	Up	2.97e-15	1.19e-13
lnc-NMD3-2:1	3114	8	45	2.7547	15.1546	2.45979	Up	2.11e-07	2.98e-06
lnc-ZNF705B-1:9	2829	10	56	3.79027	20.759	2.45336	Up	6.82e-09	1.27e-07
RBFADN:7	1350	5	28	3.97136	21.7508	2.45336	Up	5.04e-05	0.00042222
lnc-ARHGEF6-1:1	655	5	28	8.18524	44.8299	2.45336	Up	5.04e-05	0.00042235
lnc-RBP2-2:1	680	10	56	15.7686	86.3634	2.45336	Up	6.82e-09	1.27e-07
lnc-PIK3C3-13:1	422	12	67	30.491	166.5	2.44906	Up	2.24e-10	5.32e-09
lnc-CBX2-5:1	2354	12	67	5.4661	29.8483	2.44906	Up	2.24e-10	5.31e-09
lnc-C1orf52-2:1	2569	14	78	5.84341	31.8406	2.44598	Up	7.44e-12	2.13e-10
lnc-DAPK1-7:1	3239	9	50	2.97944	16.1886	2.44187	Up	4.92e-08	7.87e-07
lnc-CPSF2-4:1	1185	11	61	9.95353	53.9836	2.43924	Up	1.6e-09	3.33e-08
lnc-DOK6-3:1	2679	66	366	26.4164	143.271	2.43924	Up	3.07e-50	6.22e-48
lnc-NHS-2:1	2487	13	72	5.60493	30.3604	2.43742	Up	5.29e-11	1.36e-09
lnc-ZNF33A-8:1	7063	28	155	4.25081	23.0141	2.43671	Up	3.99e-22	2.66e-20
lnc-JAG1-6:1	1831	51	282	29.8665	161.514	2.43506	Up	5.34e-39	7.72e-37
lnc-TERT-4:1	2894	6	33	2.22308	11.9582	2.42737	Up	1.14e-05	0.000112883
lnc-FRZB-2:3	2492	8	44	3.44227	18.5163	2.42737	Up	3.58e-07	4.86e-06
lnc-RASGRF1-7:1	2140	6	33	3.00635	16.1715	2.42737	Up	1.14e-05	0.000112842
lnc-CMTM4-2:1	7026	70	382	10.683	57.0172	2.41608	Up	8.45e-52	1.8e-49
lnc-FAM19A2-2:7	1962	7	38	3.82562	20.3112	2.40851	Up	2.62e-06	3.01e-05
lnc-HIST1H4D-1:2	1578	7	38	4.75657	25.2538	2.40851	Up	2.62e-06	3.01e-05
lnc-MTFP1-3:1	401	7	38	18.7179	99.3779	2.40851	Up	2.62e-06	3.01e-05
lnc-TMEM109-1:7	446	7	38	16.8293	89.351	2.40851	Up	2.62e-06	3.01e-05
lnc-RUBCN-2:9	487	5	27	11.0089	58.1414	2.4009	Up	8.57e-05	0.000670516
lnc-LHFPL5-1:2	2751	5	27	1.94887	10.2926	2.4009	Up	8.57e-05	0.000670708
MIS18A-AS1:3	5498	5	27	0.975142	5.15003	2.4009	Up	8.57e-05	0.000671092
lnc-SERINC5-1:4	748	5	27	7.16756	37.8541	2.4009	Up	8.57e-05	0.0006709
lnc-JPH1-3:1	2810	5	27	1.90795	10.0765	2.4009	Up	8.57e-05	0.000671285
lnc-MYC-1:1	4060	24	129	6.33852	33.3207	2.3942	Up	2.66e-18	1.39e-16
lnc-HDDC2-10:1	5819	11	59	2.02697	10.633	2.39115	Up	4.54e-09	8.77e-08
lnc-KCNE4-7:1	1695	56	300	35.4259	185.61	2.3894	Up	1.64e-40	2.55e-38
lnc-RHBDD1-6:6	12863	28	150	2.33409	12.2292	2.3894	Up	5.28e-21	3.25e-19
LINC00665:22	9307	20	107	2.30422	12.0566	2.38748	Up	2.28e-15	9.17e-14
lnc-TP53TG3F-1:1	364	12	64	35.3494	184.387	2.38297	Up	1.07e-09	2.29e-08
lnc-TPD52-3:11	877	16	85	19.5624	101.641	2.37733	Up	1.99e-12	6.03e-11
lnc-NPC1-7:3	2350	16	85	7.30054	37.9316	2.37733	Up	1.99e-12	6.04e-11
LINC00893:24	618	7	37	12.1454	62.7862	2.37003	Up	4.41e-06	4.82e-05
lnc-MFGE8-1:2	435	7	37	17.2549	89.1996	2.37003	Up	4.41e-06	4.82e-05
lnc-ZNF682-5:1	2598	15	79	6.19091	31.8888	2.36483	Up	1.4e-11	3.86e-10
lnc-KANSL1-7:3	3114	8	42	2.7547	14.1443	2.36025	Up	1.01e-06	1.27e-05
lnc-TC2N-1:2	2964	12	63	4.34116	22.2901	2.36025	Up	1.79e-09	3.68e-08
lnc-FOXL2-5:4	13331	12	63	0.965209	4.95597	2.36025	Up	1.79e-09	3.68e-08
lnc-DICER1-5:3	1772	13	68	7.86651	40.2435	2.35496	Up	4.2e-10	9.57e-09
lnc-HNRNPU-3:1	2434	10	52	4.40537	22.4044	2.34645	Up	5.46e-08	8.65e-07
lnc-TMC5-1:1	510	20	104	42.0497	213.852	2.34645	Up	1.06e-14	3.98e-13
lnc-RBM23-2:4	259	10	52	41.4002	210.549	2.34645	Up	5.46e-08	8.65e-07
lnc-SLC25A13-1:11	2460	6	31	2.61528	13.2153	2.33717	Up	3.26e-05	0.000286651
lnc-SYPL1-4:1	671	6	31	9.58808	48.4496	2.33717	Up	3.26e-05	0.000286744
lnc-FAM86B2-1:1	663	6	31	9.70377	49.0342	2.33717	Up	3.26e-05	0.000286559
lnc-ITGA1-1:1	3851	18	93	5.01189	25.3256	2.33717	Up	3.12e-13	1.04e-11
lnc-TBC1D26-4:1	690	12	62	18.6481	94.2309	2.33717	Up	2.99e-09	5.92e-08
lnc-ZNF486-12:1	2940	66	340	24.0713	121.278	2.33293	Up	1.85e-44	3.29e-42
lnc-MRPS22-1:13	3262	7	36	2.301	11.5736	2.33051	Up	7.41e-06	7.65e-05
lnc-PRDM9-14:7	757	7	36	9.91528	49.8721	2.33051	Up	7.41e-06	7.65e-05
lnc-TRIML2-12:1	1223	7	36	6.13726	30.8693	2.33051	Up	7.41e-06	7.65e-05
lnc-MTR-1:2	7360	14	72	2.03964	10.259	2.33051	Up	1.65e-10	3.97e-09
lnc-MED1-2:1	822	17	87	22.1758	110.994	2.32342	Up	2.19e-12	6.62e-11
lnc-MTR-5:1	1574	10	51	6.81237	33.9794	2.31843	Up	9.12e-08	1.38e-06
lnc-FRZB-3:1	615	10	51	17.4352	86.9652	2.31843	Up	9.12e-08	1.38e-06
LINC00472:56	35028	315	1585	9.64268	47.4531	2.299	Up	2.05e-197	2.95e-194
lnc-ACTR1B-5:1	2142	190	954	95.1123	467.067	2.29593	Up	2.23e-119	1.65e-116
lnc-PTPRO-2:1	2416	23	115	10.2078	49.9173	2.28986	Up	1.09e-15	4.58e-14
lnc-ACKR3-6:2	2548	18	90	7.57488	37.0419	2.28986	Up	1.43e-12	4.39e-11
lnc-AQP4-5:1	2821	30	150	11.403	55.7621	2.28986	Up	4.92e-20	2.86e-18
lnc-ARHGAP29-7:1	1193	11	55	9.88678	48.3474	2.28986	Up	3.54e-08	5.86e-07
lnc-TMEM8B-1:3	5245	7	35	1.43105	6.99799	2.28986	Up	1.24e-05	0.00012174
lnc-MAP3K5-3:2	2904	13	65	4.80009	23.4729	2.28986	Up	1.94e-09	3.98e-08
lnc-PTAR1-4:1	2303	8	40	3.72476	18.2145	2.28986	Up	2.84e-06	3.25e-05
lnc-COA6-1:3	4998	28	139	6.0071	29.1655	2.27952	Up	1.41e-18	7.51e-17
MAGI1-IT1:2	2786	19	94	7.31266	35.3832	2.2746	Up	5.62e-13	1.82e-11
lnc-TBC1D12-1:1	645	29	143	48.2104	232.502	2.26983	Up	5.6e-19	3.07e-17
lnc-UNC93B1-6:1	662	22	108	35.6342	171.087	2.26339	Up	1.25e-14	4.67e-13
lnc-CA4-3:4	4746	9	44	2.03338	9.72245	2.25744	Up	1.09e-06	1.36e-05
lnc-SRD5A1-3:1	1058	8	39	8.10788	38.6571	2.25334	Up	4.73e-06	5.08e-05
lnc-ZNF618-1:1	1205	13	63	11.568	54.8282	2.24478	Up	5.33e-09	1.01e-07
lnc-GLRA4-2:3	573	108	522	202.103	955.359	2.24095	Up	3.14e-64	9.03e-62
NRIR:6	1637	6	29	3.93012	18.578	2.24095	Up	9.11e-05	0.00070864
lnc-MYOCOS-3:1	868	6	29	7.41198	35.0372	2.24095	Up	9.11e-05	0.000709044
lnc-GLRX5-5:2	1161	6	29	5.54143	26.1949	2.24095	Up	9.11e-05	0.000708842
lnc-SLITRK5-17:1	1030	10	48	10.4104	48.8714	2.23097	Up	4.18e-07	5.58e-06
lnc-ECM2-1:1	691	9	43	13.9658	65.2591	2.22428	Up	1.8e-06	2.16e-05
lnc-C8orf34-5:1	548	9	43	17.6102	82.2884	2.22428	Up	1.8e-06	2.17e-05
lnc-CASP3-2:3	723	9	43	13.3477	62.3707	2.22428	Up	1.8e-06	2.16e-05
lnc-LRRC3C-2:1	430	25	119	62.3411	290.221	2.2189	Up	1.25e-15	5.21e-14
lnc-TRMT11-2:2	3277	24	114	7.85303	36.482	2.21586	Up	5.24e-15	2.03e-13
lnc-OGFRL1-6:1	1288	12	57	9.99006	46.4098	2.21586	Up	3.75e-08	6.16e-07
lnc-PTDSS1-3:1	2931	8	38	2.92669	13.5962	2.21586	Up	7.84e-06	8.06e-05
lnc-TRPC4-2:4	1159	93	439	86.0404	397.221	2.20685	Up	2.71e-53	6.02e-51
lnc-TPD52-3:4	585	7	33	12.8305	59.1573	2.20498	Up	3.43e-05	0.000300169
lnc-ULK4-15:1	3194	7	33	2.34999	10.835	2.20498	Up	3.43e-05	0.000300265
lnc-JCAD-7:1	287	7	33	26.1528	120.582	2.20498	Up	3.43e-05	0.000300073
lnc-BIRC2-9:3	8837	27	127	3.27613	15.0713	2.20173	Up	1.93e-16	8.65e-15
lnc-PPP1R3D-7:1	1155	10	47	9.28369	42.6743	2.2006	Up	6.9e-07	8.88e-06
lnc-MYC-8:1	1563	33	155	22.639	103.998	2.19967	Up	9.86e-20	5.65e-18
lnc-USP53-8:6	1658	13	61	8.4074	38.583	2.19823	Up	1.45e-08	2.55e-07
lnc-PRPS2-1:1	686	28	131	43.766	200.262	2.194	Up	7.56e-17	3.53e-15
lnc-CACNA1B-1:3	730	18	84	26.4394	120.672	2.19033	Up	2.87e-11	7.64e-10
lnc-LRRC3C-1:5	2207	12	56	5.83018	26.6095	2.19033	Up	6.18e-08	9.73e-07
lnc-DPH6-3:1	3199	15	70	5.02782	22.9474	2.19033	Up	1.32e-09	2.77e-08
lnc-TSPAN13-3:2	1194	8	37	7.18436	32.4974	2.17739	Up	1.29e-05	0.000125608
lnc-HIVEP1-5:1	3174	8	37	2.70263	12.2249	2.17739	Up	1.29e-05	0.000125563
lnc-HS3ST5-7:1	2784	31	143	11.9397	53.8663	2.17361	Up	4.56e-18	2.33e-16
lnc-ZNF320-2:5	1060	10	46	10.1157	45.5096	2.16957	Up	1.14e-06	1.41e-05
lnc-PRSS12-4:1	351	7	32	21.3842	95.6078	2.16058	Up	5.66e-05	0.000463805
lnc-ENOPH1-2:1	1223	7	32	6.13726	27.4394	2.16058	Up	5.66e-05	0.000463527
lnc-FAM86C1-4:1	409	7	32	18.3517	82.0498	2.16058	Up	5.66e-05	0.000463666
lnc-CAMSAP2-1:4	8907	9	41	1.08346	4.82729	2.15556	Up	4.9e-06	5.25e-05
lnc-RNF113B-5:1	682	9	41	14.1501	63.0449	2.15556	Up	4.9e-06	5.25e-05
lnc-RNF113B-7:1	1769	24	109	14.5474	64.6174	2.15116	Up	6.13e-14	2.17e-12
lnc-SPIN2A-1:1	1152	13	59	12.1002	53.7094	2.15014	Up	3.89e-08	6.37e-07
lnc-WASHC5-5:2	4294	15	68	3.74569	16.6072	2.14851	Up	3.53e-09	6.93e-08
lnc-ERV3-1-2:4	496	29	131	62.693	276.975	2.14338	Up	2.1e-16	9.31e-15
lnc-CD40LG-2:10	5694	31	140	5.83777	25.7846	2.14302	Up	1.97e-17	9.55e-16
lnc-OAZ3-2:26	655	16	72	26.1928	115.277	2.13786	Up	1.36e-09	2.86e-08
lnc-UCK1-2:1	2559	8	36	3.35214	14.7531	2.13786	Up	2.13e-05	0.000195387
lnc-LIPG-11:1	3548	22	99	6.64878	29.2619	2.13786	Up	1.07e-12	3.36e-11
lnc-DHRS7C-1:1	2374	8	36	3.61337	15.9028	2.13786	Up	2.13e-05	0.000195452
VCAN-AS1:6	453	14	63	33.1385	145.845	2.13786	Up	1.5e-08	2.63e-07
lnc-TNFAIP6-6:1	1006	21	94	22.3833	97.9897	2.13021	Up	4.48e-12	1.32e-10
lnc-GLRX5-2:2	3665	87	389	25.4535	111.308	2.12862	Up	2.21e-45	3.98e-43
lnc-DEPDC4-2:4	2457	17	76	7.41902	32.4384	2.1284	Up	5.27e-10	1.19e-08
lnc-ATP6V0E2-2:10	2043	17	76	8.92243	39.0118	2.1284	Up	5.27e-10	1.19e-08
lnc-CTTNBP2-3:5	13903	26	116	2.00525	8.74984	2.12548	Up	1.51e-14	5.61e-13
lnc-CFAP126-1:1	863	13	58	16.1523	70.4803	2.12548	Up	6.36e-08	1e-06
lnc-SENP2-1:2	1606	13	58	8.67962	37.8733	2.12548	Up	6.36e-08	9.99e-07
lnc-ERCC6-1:1	13574	76	339	6.00355	26.1904	2.12515	Up	1.12e-39	1.66e-37
DICER1-AS1:16	2323	11	49	5.07746	22.1206	2.12321	Up	7.09e-07	9.12e-06
lnc-LARP4-5:1	1145	11	49	10.3012	44.8788	2.12321	Up	7.09e-07	9.11e-06
lnc-MGARP-1:3	838	11	49	14.0751	61.3201	2.12321	Up	7.09e-07	9.11e-06
lnc-DHX38-40:1	1822	9	40	5.2966	23.023	2.11994	Up	8.03e-06	8.25e-05
lnc-POU5F1B-14:1	1848	9	40	5.22208	22.6991	2.11994	Up	8.03e-06	8.25e-05
lnc-IRF2BP2-11:1	35691	9	40	0.270387	1.17531	2.11994	Up	8.03e-06	8.25e-05
lnc-TIMM13-2:1	885	12	53	14.5392	62.8034	2.11089	Up	2.71e-07	3.76e-06
lnc-NUCB2-6:1	1749	10	44	6.13074	26.3823	2.10544	Up	3.04e-06	3.47e-05
lnc-UNC93B1-7:1	582	15	66	27.6357	118.925	2.10544	Up	9.38e-09	1.71e-07
lnc-SCYL3-3:1	454	13	57	30.7037	131.665	2.10039	Up	1.04e-07	1.55e-06
lnc-ARHGEF37-1:1	3120	8	35	2.7494	11.7642	2.09722	Up	3.48e-05	0.000304479
lnc-SLC26A11-1:1	653	44	192	72.2507	308.346	2.09347	Up	9.93e-23	6.87e-21
lnc-MTG2-2:1	590	11	48	19.9914	85.3178	2.09347	Up	1.16e-06	1.44e-05
lnc-ZNF195-1:6	3471	47	205	14.5193	61.937	2.09283	Up	3.7e-24	2.78e-22
lnc-EIF2AK4-6:1	1608	209	911	139.368	594.132	2.09188	Up	9.82e-102	5.48e-99
lnc-HMGB2-2:1	1073	17	74	16.9884	72.324	2.08993	Up	1.39e-09	2.91e-08
lnc-GK5-7:1	4452	63	274	15.1736	64.5425	2.08869	Up	1.06e-31	1.14e-29
lnc-EXOC4-1:1	563	9	39	17.141	72.6452	2.08341	Up	1.31e-05	0.000127131
lnc-CASP6-1:1	948	12	52	13.573	57.5235	2.08341	Up	4.4e-07	5.87e-06
lnc-SEC62-2:4	817	14	60	18.3742	77.0158	2.06747	Up	6.43e-08	1.01e-06
lnc-SHANK2-7:1	377	8	34	22.7537	94.5776	2.0554	Up	5.68e-05	0.000464516
lnc-ACCS-1:1	2178	8	34	3.93854	16.3709	2.0554	Up	5.68e-05	0.000464934
lnc-TBC1D8-1:3	2302	8	34	3.72638	15.489	2.0554	Up	5.68e-05	0.000464794
lnc-FAM84B-15:24	5735	8	34	1.49575	6.21722	2.0554	Up	5.68e-05	0.000464655
lnc-SMN1-3:1	322	8	34	26.6402	110.732	2.0554	Up	5.68e-05	0.000464377
lnc-SMN2-3:1	3634	92	390	27.146	112.546	2.0517	Up	1.79e-43	3.08e-41
CDKN2B-AS1:42	4760	13	55	2.92846	12.1173	2.04886	Up	2.72e-07	3.78e-06
lnc-NDRG1-1:1	566	45	190	85.2509	352.037	2.04594	Up	6.74e-22	4.4e-20
lnc-DDR2-3:1	13895	32	135	2.46942	10.1889	2.04475	Up	5.77e-16	2.47e-14
lnc-CDK2AP1-1:10	1131	10	42	9.48069	38.9437	2.03833	Up	8.03e-06	8.25e-05
lnc-AEBP2-3:1	5391	50	208	9.94497	40.4617	2.02452	Up	1.58e-23	1.14e-21
lnc-ANKRD26-1:5	868	14	58	17.2946	70.0743	2.01856	Up	1.67e-07	2.42e-06
KCTD21-AS1:14	1880	8	33	4.56284	18.408	2.01233	Up	9.21e-05	0.000716071
lnc-HSDL2-5:1	533	16	66	32.1881	129.858	2.01233	Up	2.45e-08	4.13e-07
lnc-JAK1-4:1	618	8	33	13.8805	55.9985	2.01233	Up	9.21e-05	0.000715867
lnc-LXN-1:3	1552	8	33	5.52715	22.2984	2.01233	Up	9.21e-05	0.000716274
lnc-ZNF605-4:2	797	9	37	12.1084	48.6849	2.00746	Up	3.45e-05	0.000301676
lnc-TC2N-1:3	6943	38	156	5.86866	23.5629	2.00541	Up	8.25e-18	4.1e-16
LINC00472:10	12222	29	119	2.54424	10.2107	2.00477	Up	6.48e-14	2.3e-12
lnc-PSMB11-1:5	2585	10	41	4.14803	16.6331	2.00356	Up	1.3e-05	0.000125851
lnc-PPIG-1:1	409	11	45	28.8385	115.382	2.00036	Up	4.9e-06	5.26e-05
RRS1-AS1:5	12018	12	49	1.07066	4.27577	1.99768	Up	1.86e-06	2.22e-05
lnc-TMEM70-4:2	498	85	346	183.017	728.614	1.99317	Up	2.24e-37	3.09e-35
PCAT1:5	2054	16	65	8.35261	33.1867	1.9903	Up	3.93e-08	6.42e-07
lnc-RSPH1-5:1	1473	17	68	12.3751	48.4124	1.96794	Up	2.41e-08	4.06e-07
lnc-TMEM189-UBE2V1-4:7	421	9	36	22.9226	89.6749	1.96794	Up	5.56e-05	0.000455692
lnc-GDPD4-4:1	220	9	36	43.8654	171.605	1.96794	Up	5.56e-05	0.000455555
lnc-NUAK1-7:1	831	30	119	38.71	150.175	1.95586	Up	1.62e-13	5.52e-12
lnc-SCN5A-4:1	2511	17	67	7.25947	27.982	1.94656	Up	3.84e-08	6.29e-07
lnc-EML4-5:1	1475	17	67	12.3583	47.6358	1.94656	Up	3.84e-08	6.29e-07
lnc-TTC23-4:1	269	14	55	55.8057	214.418	1.94194	Up	6.88e-07	8.85e-06
lnc-ZC3HC1-5:1	1681	22	86	14.0332	53.6514	1.93477	Up	5.13e-10	1.16e-08
lnc-MYOM1-10:2	10641	11	43	1.10844	4.23776	1.93477	Up	1.26e-05	0.000123581
lnc-ALPK1-2:4	590	11	43	19.9914	76.4306	1.93477	Up	1.26e-05	0.000123625
lnc-MYO19-1:3	3185	10	39	3.36661	12.8412	1.93141	Up	3.34e-05	0.000293485
lnc-BDH2-4:1	291	28	109	103.173	392.811	1.92877	Up	2.71e-12	8.17e-11
lnc-HIST2H3A-1:2	1534	9	35	6.291	23.9273	1.92729	Up	8.91e-05	0.000694631
lnc-YIF1B-1:1	348	9	35	27.731	105.473	1.92729	Up	8.91e-05	0.000694829
lnc-SCAND1-5:1	3493	57	221	17.4976	66.3505	1.92295	Up	2.26e-23	1.61e-21
lnc-IL17RA-11:2	2855	16	62	6.0092	22.7738	1.92213	Up	1.59e-07	2.32e-06
lnc-RPA3-6:1	800	39	151	52.273	197.942	1.92094	Up	2.06e-16	9.17e-15
lnc-SFRP1-2:1	537	27	104	53.9128	203.1	1.91349	Up	1.11e-11	3.1e-10
lnc-MYO16-9:3	10966	19	73	1.85784	6.98112	1.90983	Up	1.42e-08	2.52e-07
lnc-MTSS1-4:1	461	25	96	58.1489	218.384	1.90904	Up	7.4e-11	1.87e-09
lnc-CDK12-1:7	4038	59	226	15.6671	58.6939	1.90547	Up	1.35e-23	9.74e-22
lnc-USP35-11:1	698	41	157	62.9841	235.882	1.90501	Up	7.77e-17	3.61e-15
lnc-DIP2A-6:1	2902	23	88	8.49832	31.8006	1.90381	Up	4.96e-10	1.13e-08
lnc-SH3D21-3:1	1838	11	42	6.41726	23.9637	1.90082	Up	2.01e-05	0.000184964
lnc-SUMF1-19:1	2290	33	126	15.4519	57.7013	1.90082	Up	9.38e-14	3.26e-12
lnc-PASK-2:2	340	27	103	85.1506	317.694	1.89955	Up	1.75e-11	4.77e-10
lnc-TCP1-5:1	454	48	183	113.367	422.713	1.89867	Up	2.64e-19	1.48e-17
lnc-ZNF648-6:1	1610	14	53	9.32406	34.5224	1.8885	Up	1.74e-06	2.09e-05
lnc-CARHSP1-2:1	304	22	83	77.5982	286.322	1.88354	Up	2.03e-09	4.14e-08
lnc-ZNF708-2:14	3189	35	132	11.7684	43.408	1.88305	Up	3.51e-14	1.27e-12
lnc-MORF4L2-3:1	5971	39	147	7.00358	25.8179	1.88221	Up	1.27e-15	5.26e-14
lnc-KIF3B-1:1	493	13	49	28.2748	104.232	1.88221	Up	4.56e-06	4.97e-05
lnc-RPLP1-12:47	4700	13	49	2.96584	10.9332	1.88221	Up	4.56e-06	4.98e-05
lnc-USP53-8:30	2376	145	546	65.4371	240.989	1.88078	Up	7.82e-54	1.77e-51
lnc-RICTOR-54:14	2352	41	154	18.6917	68.6648	1.87717	Up	3.02e-16	1.32e-14
LINC01515:31	6424	53	199	8.84653	32.4861	1.87664	Up	1.46e-20	8.79e-19
lnc-C5orf42-5:1	291	12	45	44.2172	162.17	1.87483	Up	1.2e-05	0.000118437
lnc-SYNCRIP-7:1	755	11	41	15.6224	56.9492	1.86606	Up	3.18e-05	0.000280683
lnc-ZNF720-5:3	837	11	41	14.0919	51.3699	1.86606	Up	3.18e-05	0.000280593
lnc-TACSTD2-4:1	383	11	41	30.7962	112.263	1.86606	Up	3.18e-05	0.000280502
lnc-PDLIM3-3:1	512	10	37	20.9427	75.7848	1.85546	Up	8.46e-05	0.000663294
lnc-TIGD7-1:7	801	10	37	13.3866	48.4417	1.85546	Up	8.46e-05	0.000663484
lnc-PFKFB3-12:2	4846	13	48	2.87649	10.3874	1.85246	Up	7.21e-06	7.49e-05
lnc-NIM1K-1:1	2125	223	823	112.525	406.155	1.85179	Up	1.26e-78	4.8e-76
lnc-SYCP3-3:2	665	12	44	19.3492	69.3876	1.84241	Up	1.9e-05	0.000176021
lnc-NBPF3-10:1	1187	12	44	10.8401	38.8734	1.84241	Up	1.9e-05	0.000175902
lnc-RFX3-4:1	1577	12	44	8.15929	29.2598	1.84241	Up	1.9e-05	0.000175961
lnc-WBP4-2:9	16260	107	392	7.05612	25.2823	1.84118	Up	4.74e-38	6.69e-36
lnc-FGL1-3:7	575	23	84	42.8907	153.201	1.83669	Up	3.03e-09	5.99e-08
lnc-MYOZ1-1:2	815	14	51	18.4193	65.6241	1.83301	Up	4.32e-06	4.73e-05
lnc-DYNLL2-3:2	3526	14	51	4.25744	15.1684	1.83301	Up	4.32e-06	4.73e-05
lnc-EHHADH-2:1	1043	33	120	33.926	120.656	1.83043	Up	1.39e-12	4.32e-11
lnc-ZNF25-4:1	1834	33	120	19.2938	68.6171	1.83043	Up	1.39e-12	4.31e-11
lnc-PIK3R4-3:3	7094	22	80	3.32533	11.8263	1.83043	Up	7.85e-09	1.45e-07
lnc-STARD13-2:6	1966	11	40	5.99946	21.3367	1.83043	Up	5.03e-05	0.000421206
lnc-MAGEA10-2:1	2072	57	207	29.4977	104.769	1.82853	Up	1.21e-20	7.38e-19
FAM198B-AS1:24	2635	21	76	8.54558	30.2471	1.82355	Up	2.03e-08	3.5e-07
lnc-SGK3-2:5	1850	10	36	5.79603	20.4071	1.81593	Up	0.000133531	0.000988712
lnc-ERRFI1-1:2	2884	20	72	7.43597	26.1811	1.81593	Up	5.27e-08	8.37e-07
lnc-ZFP42-12:1	1821	22	79	12.9543	45.4954	1.81229	Up	1.23e-08	2.18e-07
MIR4435-2HG:30	1482	17	61	12.3	43.165	1.81121	Up	5.93e-07	7.79e-06
PVT1:54	1551	12	43	8.29607	29.0742	1.80924	Up	2.99e-05	0.000264542
lnc-THRSP-3:1	551	12	43	23.3524	81.8403	1.80924	Up	2.99e-05	0.000264627
lnc-PAPPA2-7:1	3414	14	50	4.39711	15.3588	1.80444	Up	6.78e-06	7.06e-05
lnc-MED1-4:1	670	57	203	91.2227	317.74	1.80038	Up	7.05e-20	4.06e-18
lnc-MED13-3:2	211	43	153	218.519	760.431	1.79906	Up	2.52e-15	1.01e-13
SNHG5:31	5362	38	135	7.59905	26.4033	1.79682	Up	1.14e-13	3.93e-12
lnc-HDX-2:1	2249	20	71	9.5355	33.107	1.79576	Up	8.23e-08	1.26e-06
lnc-TMEM248-2:3	1738	11	39	6.7865	23.5324	1.79391	Up	7.91e-05	0.000625254
lnc-ZNF783-3:4	1494	11	39	7.89487	27.3757	1.79391	Up	7.91e-05	0.000625073
lnc-C12orf49-16:1	493	11	39	23.9248	82.9599	1.79391	Up	7.91e-05	0.000625435
lnc-TPBG-4:1	2411	13	46	5.78161	20.0083	1.79106	Up	1.78e-05	0.000166986
lnc-ERVMER34-1-4:1	572	13	46	24.3697	84.3359	1.79106	Up	1.78e-05	0.000166929
lnc-BDH2-5:1	792	15	53	20.3081	70.1781	1.78897	Up	4.04e-06	4.45e-05
lnc-FOXC1-12:3	2609	15	53	6.16481	21.3036	1.78897	Up	4.04e-06	4.45e-05
lnc-ABCA4-1:1	2551	45	159	18.9149	65.3638	1.78897	Up	9.26e-16	3.91e-14
PKP4-AS1:5	4067	17	60	4.48206	15.4713	1.78736	Up	9.26e-07	1.17e-05
lnc-LARP1B-1:26	3078	29	102	10.1026	34.7522	1.78238	Up	1.47e-10	3.57e-09
lnc-TMEM135-7:1	1192	12	42	10.7946	36.9508	1.77529	Up	4.68e-05	0.000394789
lnc-NIM1K-1:2	643	36	126	60.0336	205.499	1.77529	Up	1.16e-12	3.63e-11
lnc-MAGOHB-1:4	1880	12	42	6.84425	23.4284	1.77529	Up	4.68e-05	0.000394667
lnc-ADGRL4-6:1	2863	370	1293	138.574	473.618	1.77306	Up	1.76e-115	1.14e-112
lnc-TROVE2-3:1	6070	62	216	10.9523	37.3178	1.76863	Up	1.39e-20	8.45e-19
lnc-FOXM1-1:1	1137	21	73	19.8044	67.3307	1.76544	Up	7.68e-08	1.19e-06
lnc-PLD1-2:1	1893	114	396	64.5739	219.379	1.7644	Up	2.51e-36	3.38e-34
lnc-PRR11-4:1	1324	13	45	10.5283	35.6431	1.75935	Up	2.78e-05	0.000247335
lnc-PTPN14-4:2	5552	24	83	4.63516	15.6776	1.75801	Up	1.07e-08	1.94e-07
lnc-P3H2-7:1	803	11	38	14.6886	49.6271	1.75643	Up	0.000123713	0.00092277
lnc-CEP350-3:5	2439	11	38	4.83597	16.3389	1.75643	Up	0.000123713	0.000922519
lnc-MCPH1-7:1	1253	53	183	45.3552	153.162	1.75572	Up	1.69e-17	8.23e-16
lnc-ANXA10-5:1	2356	56	193	25.4868	85.9078	1.75304	Up	2.43e-18	1.28e-16
lnc-ATAD2-1:1	4929	43	148	9.35432	31.4886	1.75112	Up	2.22e-14	8.13e-13
lnc-AK6-3:3	675	16	55	25.4167	85.4495	1.7493	Up	3.75e-06	4.16e-05
lnc-GDAP2-2:2	3085	14	48	4.86604	16.3169	1.74554	Up	1.65e-05	0.000156259
lnc-CCDC14-1:8	615	40	137	69.7409	233.612	1.74404	Up	2.39e-13	8.02e-12
lnc-ANKRD20A8P-12:1	3330	17	58	5.47403	18.2656	1.73845	Up	2.24e-06	2.63e-05
lnc-NIPBL-4:1	2311	27	92	12.5276	41.7483	1.73661	Up	2.32e-09	4.71e-08
APTR:16	10980	15	51	1.46484	4.871	1.73347	Up	9.78e-06	9.73e-05
lnc-PAPPA2-1:5	6592	20	68	3.25324	10.8179	1.73347	Up	3.07e-07	4.24e-06
lnc-GOLPH3-4:1	379	20	68	56.584	188.157	1.73347	Up	3.07e-07	4.24e-06
lnc-SYT15-3:1	551	74	251	144.007	477.719	1.73003	Up	5.29e-23	3.7e-21
lnc-PHF8-1:1	3596	59	200	17.5928	58.3258	1.72915	Up	1.27e-18	6.79e-17
lnc-CBY3-2:1	1100	13	44	12.6722	41.9479	1.72693	Up	4.32e-05	0.000368223
GPRC5D-AS1:38	2500	29	98	12.4383	41.109	1.72467	Up	8.37e-10	1.81e-08
lnc-NANOGP8-1:2	1342	16	54	12.7841	42.198	1.72282	Up	5.81e-06	6.2e-05
CYTOR:15	1394	39	131	29.9988	98.5506	1.71596	Up	1.44e-12	4.41e-11
lnc-CRB1-2:1	1445	17	57	12.6149	41.3673	1.71336	Up	3.46e-06	3.86e-05
lnc-GFM1-8:1	578	23	77	42.668	139.705	1.71116	Up	6.56e-08	1.03e-06
lnc-MRPS30-7:1	4331	636	2129	157.461	515.511	1.71101	Up	8.27e-180	1.03e-176
CRTC3-AS1:10	25462	26	87	1.09492	3.58325	1.71044	Up	9.16e-09	1.67e-07
lnc-SELENOS-2:1	819	53	177	69.3896	226.642	1.70762	Up	2.2e-16	9.75e-15
lnc-SOX6-4:1	673	12	40	19.1192	62.3298	1.7049	Up	0.000113335	0.000851165
lnc-CLDN10-4:1	1142	12	40	11.2672	36.732	1.7049	Up	0.000113335	0.000851398
lnc-CPSF6-2:1	3139	75	249	25.6196	83.1876	1.69912	Up	2.67e-22	1.79e-20
lnc-ZNF585A-4:4	13626	38	126	2.99032	9.69734	1.69729	Up	5.59e-12	1.62e-10
ZNF337-AS1:1	3665	16	53	4.68111	15.1654	1.69586	Up	8.97e-06	9.1e-05
lnc-FGFBP3-2:1	309	171	566	593.39	1920.92	1.69474	Up	1.72e-48	3.35e-46
lnc-DDX60-2:1	507	13	43	27.494	88.9429	1.69376	Up	6.68e-05	0.000539918
lnc-MFSD8-8:2	430	59	195	147.125	475.573	1.69262	Up	1.06e-17	5.28e-16
lnc-APOL1-16:1	8149	59	195	7.76337	25.0946	1.69262	Up	1.06e-17	5.27e-16
LINC00662:57	15660	34	112	2.32804	7.50027	1.68783	Up	1e-10	2.47e-09
lnc-RPS24-19:1	3013	17	56	6.04996	19.4912	1.68783	Up	5.32e-06	5.69e-05
lnc-EIF2S2-1:1	873	24	79	29.4781	94.8994	1.68675	Up	6.02e-08	9.5e-07
lnc-TPTE2-5:1	1033	24	79	24.9123	80.2006	1.68675	Up	6.02e-08	9.5e-07
lnc-STARD8-3:1	4098	247	813	64.629	208.051	1.68668	Up	1.9e-68	5.9e-66
lnc-THUMPD1-3:1	778	29	95	39.9688	128.054	1.67981	Up	3.01e-09	5.97e-08
lnc-MANSC1-4:1	3845	333	1090	92.8647	297.29	1.67867	Up	1.48e-90	6.99e-88
DLEU1:30	2892	33	108	12.2354	39.163	1.67843	Up	2.55e-10	6.01e-09
lnc-DNAJC6-2:1	2509	22	72	9.4021	30.0942	1.67843	Up	2.59e-07	3.61e-06
lnc-NPTX1-2:8	8995	56	183	6.67559	21.3354	1.67628	Up	1.71e-16	7.7e-15
lnc-SFTA3-3:1	1243	23	75	19.8408	63.2763	1.67319	Up	1.54e-07	2.27e-06
LURAP1L-AS1:3	12695	91	296	7.6862	24.4517	1.6696	Up	1.29e-25	1.06e-23
lnc-SNAPC3-11:1	4605	21	68	4.88981	15.4857	1.66308	Up	6.64e-07	8.55e-06
lnc-CERS5-5:1	543	17	55	33.57	106.222	1.66183	Up	8.16e-06	8.37e-05
lnc-CLNS1A-3:4	369	18	58	52.3057	164.836	1.65599	Up	4.84e-06	5.2e-05
MIR17HG:19	28355	86	277	3.25216	10.2447	1.65541	Up	8.46e-24	6.23e-22
lnc-BTBD10-8:1	1558	41	132	28.2175	88.8499	1.65478	Up	4.29e-12	1.27e-10
lnc-CDYL2-1:1	4614	46	148	10.6901	33.6384	1.65383	Up	2.21e-13	7.45e-12
lnc-LIPI-22:1	304	37	119	130.506	410.51	1.6533	Up	5.02e-11	1.29e-09
lnc-KCNK6-1:1	443	51	164	123.444	388.231	1.65306	Up	1.15e-14	4.3e-13
lnc-RARRES1-1:1	649	65	209	107.392	337.716	1.65293	Up	2.73e-18	1.42e-16
lnc-PRR25-2:1	530	14	45	28.324	89.0404	1.65243	Up	6.06e-05	0.000493426
lnc-CCDC146-2:1	692	33	106	51.1341	160.639	1.65146	Up	5.91e-10	1.32e-08
lnc-SMIM18-3:1	1422	24	77	18.0973	56.7861	1.64976	Up	1.4e-07	2.08e-06
lnc-AGO2-2:6	1298	20	64	16.5218	51.7078	1.64601	Up	1.7e-06	2.05e-05
lnc-TIGD6-1:1	2568	101	322	42.1725	131.496	1.64064	Up	4.38e-27	3.91e-25
lnc-CTAGE5-8:5	10976	16	51	1.56307	4.87278	1.64036	Up	2.11e-05	0.000193857
lnc-LARP1-1:1	2942	16	51	5.8315	18.1793	1.64036	Up	2.11e-05	0.000193922
lnc-CD63-7:1	529	16	51	32.4315	101.103	1.64036	Up	2.11e-05	0.000193987
lnc-GINS2-3:1	679	22	70	34.7421	108.113	1.63779	Up	6.02e-07	7.91e-06
lnc-WDR4-2:6	10522	22	70	2.24196	6.9767	1.63779	Up	6.02e-07	7.9e-06
lnc-OLFML3-5:1	4134	34	108	8.81883	27.3971	1.63536	Up	5.37e-10	1.21e-08
lnc-TRMT11-5:1	1391	29	92	22.3549	69.3604	1.63352	Up	1.06e-08	1.92e-07
lnc-CREB5-2:7	1327	18	57	14.5447	45.0458	1.6309	Up	7.38e-06	7.63e-05
lnc-EXOC2-29:5	2785	18	57	6.93027	21.4635	1.6309	Up	7.38e-06	7.63e-05
lnc-FNDC3B-2:1	8066	19	60	2.5258	7.80088	1.6269	Up	4.38e-06	4.78e-05
lnc-MYO15B-3:1	2372	34	107	15.3698	47.3064	1.62194	Up	8.13e-10	1.77e-08
LINC00319:11	37111	14	44	0.404509	1.24337	1.62001	Up	9.27e-05	0.000716103
lnc-MFSD8-12:4	1562	22	69	15.1023	46.3253	1.61703	Up	9.15e-07	1.15e-05
lnc-ZNF732-4:1	4174	24	75	6.1654	18.8434	1.61179	Up	3.24e-07	4.41e-06
CDKN2B-AS1:29	4826	32	100	7.10993	21.7302	1.61179	Up	3.43e-09	6.75e-08
lnc-PLSCR2-5:3	415	32	100	82.6808	252.698	1.61179	Up	3.43e-09	6.75e-08
lnc-KCNV2-4:1	1674	33	103	21.1379	64.5256	1.61004	Up	2.05e-09	4.19e-08
lnc-CAND1-3:2	2679	19	59	7.60473	23.0956	1.60265	Up	6.64e-06	6.94e-05
lnc-LYPLAL1-7:2	2614	30	93	12.306	37.3102	1.6002	Up	1.45e-08	2.56e-07
lnc-SPATA17-2:1	1963	32	99	17.4796	52.889	1.59729	Up	5.18e-09	9.85e-08
lnc-GFM1-4:2	2185	33	102	16.1944	48.9553	1.59597	Up	3.1e-09	6.11e-08
lnc-SYDE2-1:1	1709	24	74	15.0582	45.4088	1.59243	Up	4.89e-07	6.49e-06
lnc-USP53-1:1	4233	302	931	76.5	230.649	1.59217	Up	4.55e-72	1.6e-69
lnc-DIP2A-7:1	8707	66	203	8.1279	24.45	1.58888	Up	6.58e-17	3.07e-15
lnc-PRSS23-1:10	16088	69	212	4.59886	13.8192	1.58733	Up	1.43e-17	7.04e-16
RNF139-AS1:11	1755	29	89	17.7184	53.1819	1.58569	Up	3.67e-08	6.04e-07
lnc-COMMD9-5:1	4130	15	46	3.89443	11.6804	1.58461	Up	8.29e-05	0.000652052
LINC00665:26	4949	15	46	3.24995	9.74745	1.58461	Up	8.29e-05	0.000651677
lnc-BARX2-3:1	3628	15	46	4.4333	13.2966	1.58461	Up	8.29e-05	0.000651864
lnc-GOLPH3L-2:1	720	16	49	23.8281	71.3698	1.58265	Up	4.88e-05	0.000410526
lnc-ATMIN-1:1	716	17	52	25.4588	76.1625	1.58091	Up	2.88e-05	0.000255963
lnc-CBX5-5:1	2157	17	52	8.45087	25.2816	1.58091	Up	2.88e-05	0.000256046
OGFR-AS1:2	2418	35	107	15.5208	46.4064	1.58012	Up	1.66e-09	3.45e-08
lnc-CHD1L-5:10	2139	72	220	36.0931	107.861	1.57937	Up	4.68e-18	2.39e-16
lnc-KCNE4-1:1	2279	90	274	42.3449	126.083	1.57412	Up	5.08e-22	3.36e-20
THRB-IT1:1	1754	24	73	14.6718	43.6459	1.5728	Up	7.38e-07	9.46e-06
lnc-LPCAT1-4:12	2231	32	97	15.3799	45.5956	1.56785	Up	1.17e-08	2.09e-07
lnc-HEBP2-2:1	7166	233	705	34.8644	103.172	1.56523	Up	1.07e-53	2.41e-51
lnc-ELMOD3-1:1	4470	60	181	14.3928	42.4641	1.56089	Up	6.97e-15	2.64e-13
lnc-ATG2B-9:2	2378	15	45	6.76367	19.845	1.5529	Up	0.000125444	0.000934148
lnc-SHANK2-1:10	1414	15	45	11.3748	33.3744	1.5529	Up	0.000125444	0.000933894
lnc-GNA13-5:1	597	15	45	26.9414	79.0476	1.5529	Up	0.000125444	0.000933639
lnc-CTTN-8:1	2252	35	105	16.6649	48.8958	1.5529	Up	3.74e-09	7.28e-08
lnc-PIGP-6:2	1218	22	66	19.3677	56.826	1.5529	Up	3.15e-06	3.54e-05
LCMT1-AS1:18	5407	16	48	3.17297	9.3097	1.5529	Up	7.38e-05	0.000585507
lnc-ZSCAN10-3:35	6356	16	48	2.69922	7.91969	1.5529	Up	7.38e-05	0.000585337
lnc-PLSCR2-3:2	629	32	96	54.5509	160.056	1.5529	Up	1.75e-08	3.05e-07
lnc-SH3BGRL-1:1	1423	89	264	67.0637	194.558	1.5366	Up	1.37e-20	8.32e-19
lnc-NOS1-2:1	6008	22	65	3.92641	11.3458	1.53087	Up	4.72e-06	5.07e-05
lnc-PKN1-1:2	934	44	130	50.5136	145.964	1.53087	Up	8.17e-11	2.05e-09
lnc-CDC42BPA-2:1	2575	40	118	16.6566	48.0569	1.52865	Up	6.36e-10	1.41e-08
lnc-NAPEPLD-4:1	714	20	59	30.0355	86.6572	1.52865	Up	1.35e-05	0.000129811
lnc-C2orf71-3:2	573	18	53	33.6838	97	1.52593	Up	3.85e-05	0.000330554
ACVR2B-AS1:3	9290	18	53	2.07759	5.98289	1.52593	Up	3.85e-05	0.00033045
lnc-EVX1-14:9	76549	17	50	0.238129	0.684985	1.52433	Up	6.54e-05	0.000528742
lnc-POTEH-4:1	1388	16	47	12.3604	35.5107	1.52253	Up	0.00011101	0.000834624
lnc-RTL8C-1:1	4248	44	129	11.1063	31.8461	1.51973	Up	1.21e-10	2.97e-09
lnc-GNL2-1:1	635	54	158	91.1849	260.936	1.51683	Up	1.08e-12	3.39e-11
lnc-PDE4D-7:2	556	51	149	98.3554	281.036	1.51468	Up	5.01e-12	1.46e-10
lnc-WNT11-4:1	537	21	61	41.9322	119.126	1.50636	Up	1.19e-05	0.000117138
lnc-CFAP44-2:1	1920	39	113	21.7804	61.7203	1.50271	Up	2.34e-09	4.75e-08
lnc-DLGAP5-2:1	516	28	81	58.185	164.621	1.50043	Up	4.61e-07	6.13e-06
lnc-CIB2-3:1	312	26	75	89.3555	252.091	1.49632	Up	1.3e-06	1.6e-05
lnc-ZNF131-2:15	3465	17	49	5.26076	14.8301	1.49518	Up	9.78e-05	0.000754756
LINC00963:71	15527	25	72	1.72645	4.8629	1.49401	Up	2.19e-06	2.58e-05
lnc-MOK-7:1	488	248	713	544.922	1532.22	1.4915	Up	1.1e-50	2.26e-48
lnc-SCRN1-1:6	4112	23	66	5.9976	16.8322	1.48877	Up	6.22e-06	6.6e-05
lnc-SEL1L2-2:1	354	38	109	115.102	322.904	1.48819	Up	5.8e-09	1.09e-07
lnc-PRSS12-3:1	422	20	57	50.8183	141.649	1.4789	Up	2.99e-05	0.000264768
lnc-SLC35F5-3:21	2988	19	54	6.81829	18.9524	1.4749	Up	5.07e-05	0.000424077
TET2-AS1:3	6711	25	71	3.99444	11.0949	1.47383	Up	3.25e-06	3.65e-05
lnc-HEATR5B-1:2	411	174	494	453.952	1260.48	1.47336	Up	5.08e-35	6.55e-33
lnc-NKX3-1-1:1	2483	48	136	20.7285	57.4398	1.47044	Up	1.11e-10	2.72e-09
lnc-DNAJB13-4:1	815	18	51	23.682	65.6241	1.47044	Up	8.59e-05	0.000671933
lnc-SOX4-2:1	1190	123	348	110.831	306.678	1.46837	Up	5.04e-25	3.97e-23
lnc-GBP7-1:2	768	35	99	48.8663	135.184	1.46801	Up	4.01e-08	6.52e-07
lnc-CDK12-1:9	2036	35	99	18.4329	50.9927	1.46801	Up	4.01e-08	6.51e-07
lnc-VCPIP1-2:1	563	22	62	41.9003	115.487	1.4627	Up	1.56e-05	0.000148023
lnc-ZNF615-1:1	1601	20	56	13.395	36.6815	1.45336	Up	4.44e-05	0.000377183
lnc-SHISA5-1:2	733	35	98	51.1996	140.208	1.45336	Up	5.9e-08	9.33e-07
lnc-DYNLL2-1:1	3989	160	447	43.0089	117.515	1.45014	Up	3.9e-31	4.06e-29
lnc-POLR2B-14:1	2168	29	81	14.343	39.1811	1.44981	Up	8.88e-07	1.12e-05
lnc-ABCA12-7:1	496	126	350	272.39	740.009	1.44187	Up	1.58e-24	1.22e-22
lnc-SSH3-4:1	1429	18	50	13.5065	36.6934	1.44187	Up	0.000127358	0.000945315
lnc-LARP1B-1:22	8106	44	122	5.82035	15.7835	1.43924	Up	1.84e-09	3.77e-08
lnc-STAM2-1:2	293	57	158	208.598	565.51	1.43883	Up	7.63e-12	2.18e-10
lnc-C8G-2:1	1322	26	72	21.0884	57.1152	1.43742	Up	4.21e-06	4.62e-05
lnc-CCDC14-1:4	783	95	263	130.096	352.245	1.437	Up	1.01e-18	5.41e-17
lnc-NIM1K-9:1	11644	375	1037	34.5328	93.3958	1.43539	Up	5.81e-69	1.87e-66
SMAD1-AS2:4	3302	55	152	17.8603	48.2744	1.4345	Up	2.11e-11	5.71e-10
lnc-LRP1B-4:3	4796	21	58	4.69508	12.6823	1.4336	Up	3.88e-05	0.000332132
lnc-PICK1-4:1	1433	21	58	15.7136	42.4456	1.4336	Up	3.88e-05	0.000332236
lnc-GPR146-1:3	1610	25	69	16.6501	44.9442	1.4326	Up	7.08e-06	7.36e-05
lnc-MINDY1-3:2	1153	25	69	23.2495	62.7582	1.4326	Up	7.08e-06	7.36e-05
lnc-EMP2-3:2	1129	29	80	27.5427	74.3099	1.43188	Up	1.31e-06	1.6e-05
lnc-ANAPC7-4:1	26369	29	80	1.17925	3.18161	1.43188	Up	1.31e-06	1.6e-05
lnc-LRRC61-5:1	7031	114	314	17.3856	46.8342	1.42967	Up	6.67e-22	4.36e-20
lnc-NTNG1-4:1	2760	56	154	21.7561	58.5143	1.42737	Up	1.85e-11	5.04e-10
lnc-UNC93B1-5:1	2320	92	253	42.5209	114.362	1.42737	Up	6.68e-18	3.35e-16
lnc-FLNB-3:1	1297	43	118	35.5493	95.4097	1.42431	Up	4.5e-09	8.69e-08
lnc-CA8-13:4	781	50	137	68.647	183.959	1.42211	Up	2.69e-10	6.34e-09
lnc-BUD23-3:1	1787	23	63	13.8009	36.9715	1.42165	Up	2.01e-05	0.000184972
lnc-GRM6-4:1	2883	19	52	7.06662	18.9151	1.42045	Up	0.000110981	0.000834629
lnc-GOLPH3L-1:1	1992	38	104	20.4549	54.7513	1.42045	Up	3.98e-08	6.48e-07
lnc-TMCC1-10:6	1936	19	52	10.5233	28.1675	1.42045	Up	0.000110981	0.000834859
lnc-ANKDD1B-1:1	770	22	60	30.6362	81.7168	1.4154	Up	3.38e-05	0.000296742
OR2A1-AS1:24	2821	78	212	29.6479	78.8104	1.41045	Up	5.39e-15	2.08e-13
lnc-LPCAT1-4:32	1087	35	95	34.5256	91.6526	1.40851	Up	1.86e-07	2.64e-06
lnc-MBP-15:1	682	21	57	33.017	87.6478	1.40851	Up	5.71e-05	0.000466757
lnc-NIT1-1:1	3785	45	122	12.7482	33.8022	1.40682	Up	3.45e-09	6.77e-08
ZFAS1:30	1003	93	252	99.4225	263.482	1.40606	Up	1.8e-17	8.74e-16
lnc-FN1-4:1	3690	30	81	8.71761	23.0202	1.4009	Up	1.67e-06	2.01e-05
lnc-RNF40-1:1	1704	20	54	12.5853	33.2334	1.4009	Up	9.65e-05	0.000744782
lnc-HOMEZ-1:6	1594	23	62	15.4718	40.79	1.39857	Up	2.94e-05	0.000260783
lnc-ABCA12-8:1	695	103	277	158.911	417.97	1.39518	Up	7.5e-19	4.08e-17
lnc-TLL2-1:1	407	28	75	73.7677	193.249	1.3894	Up	4.69e-06	5.09e-05
PANDAR:1	1506	34	91	24.2079	63.3676	1.38827	Up	4.53e-07	6.03e-06
lnc-SRSF7-5:1	544	30	80	59.1323	154.22	1.38297	Up	2.43e-06	2.81e-05
lnc-KLF8-2:1	2281	36	96	16.9231	44.1364	1.38297	Up	2.36e-07	3.32e-06
lnc-AKR1C3-4:1	3215	30	80	10.0056	26.0951	1.38297	Up	2.43e-06	2.81e-05
lnc-MRPS30-8:2	3155	23	61	7.81684	20.2759	1.37511	Up	4.3e-05	0.00036714
lnc-SH3YL1-1:11	2463	59	156	25.6856	66.4218	1.3707	Up	5.5e-11	1.41e-09
lnc-SLC22A1-2:1	3131	87	230	29.7947	77.0363	1.37048	Up	1.61e-15	6.59e-14
lnc-GTF2H5-24:2	718	71	187	106.032	273.129	1.36508	Up	8.08e-13	2.56e-11
lnc-RAB39B-1:1	994	60	158	64.7243	166.695	1.36483	Up	4.79e-11	1.24e-09
lnc-MYH9-1:1	568	75	197	141.584	363.721	1.36117	Up	2.24e-13	7.53e-12
lnc-IPO5-7:1	8209	40	105	5.22483	13.4137	1.36025	Up	9.3e-08	1.41e-06
lnc-ALB-1:3	10868	138	362	13.6155	34.9309	1.35926	Up	2.75e-23	1.95e-21
lnc-GPR161-3:1	906	118	309	139.655	357.669	1.35676	Up	4.73e-20	2.76e-18
lnc-CCDC141-1:1	2205	47	123	22.8556	58.4988	1.35586	Up	7.97e-09	1.47e-07
lnc-C6orf62-1:1	887	47	123	56.8168	145.423	1.35586	Up	7.97e-09	1.47e-07
lnc-CD37-2:1	302	163	426	578.74	1479.29	1.35392	Up	5.66e-27	5.04e-25
lnc-GUSB-9:1	1393	23	60	17.7043	45.1701	1.35126	Up	6.26e-05	0.000508764
lnc-ZDHHC11B-4:1	962	23	60	25.6363	65.4074	1.35126	Up	6.26e-05	0.000509066
lnc-GTF2A1-78:2	5577	23	60	4.42211	11.2824	1.35126	Up	6.26e-05	0.000508915
lnc-HSCB-4:1	1606	33	86	22.0329	56.157	1.34981	Up	1.59e-06	1.92e-05
lnc-STARD10-1:6	10546	40	104	4.06701	10.3418	1.34645	Up	1.34e-07	1.99e-06
lnc-GFRA1-1:1	4459	284	734	68.2942	172.627	1.33783	Up	1.69e-44	3.02e-42
lnc-SYPL1-5:1	318	36	93	121.389	306.695	1.33717	Up	7.15e-07	9.17e-06
LINC00342:2	14261	277	715	20.8273	52.5783	1.33599	Up	2.66e-43	4.48e-41
lnc-CTAGE6-1:1	1470	76	195	55.4369	139.113	1.32734	Up	8.26e-13	2.62e-11
lnc-CCDC6-3:1	2268	23	59	10.874	27.281	1.32702	Up	9.08e-05	0.000706762
lnc-SNX7-4:1	257	23	59	95.9616	240.752	1.32702	Up	9.08e-05	0.00070656
lnc-MRPS22-4:1	2317	25	64	11.5696	28.9671	1.32408	Up	4.66e-05	0.000392998
lnc-CIB1-2:3	12173	27	69	2.37831	5.94432	1.32157	Up	2.4e-05	0.000219036
lnc-WDYHV1-1:2	8304	94	240	12.1379	30.3092	1.32024	Up	2.56e-15	1.03e-13
lnc-MYO18A-3:1	1439	142	361	105.811	263.086	1.31404	Up	3.93e-22	2.62e-20
lnc-ADCY5-1:1	1277	93	236	78.0899	193.808	1.31142	Up	6.02e-15	2.31e-13
lnc-PBDC1-8:1	3363	28	71	8.92758	22.1402	1.31033	Up	2.06e-05	0.000190133
lnc-ZNF721-2:2	1950	30	76	16.4964	40.8723	1.30897	Up	1.07e-05	0.000105613
lnc-SRD5A1-2:1	3281	68	172	22.2231	54.976	1.30674	Up	3.17e-11	8.37e-10
lnc-CRELD1-4:1	3823	55	139	15.4263	38.1295	1.30552	Up	2.53e-09	5.1e-08
lnc-CWC15-4:1	5264	40	101	8.14792	20.1213	1.30422	Up	3.98e-07	5.32e-06
lnc-APOD-4:1	1505	42	106	29.9237	73.8618	1.30354	Up	2.07e-07	2.92e-06
lnc-SEBOX-1:1	1121	31	78	29.6523	72.9692	1.29914	Up	9.17e-06	9.29e-05
lnc-PTK2-5:1	3724	31	78	8.92596	21.9652	1.29914	Up	9.17e-06	9.29e-05
lnc-RFX3-3:1	3607	142	357	42.2129	103.794	1.29797	Up	1.6e-21	1.02e-19
DGUOK-AS1:9	20862	41	103	2.10732	5.17764	1.29688	Up	3.43e-07	4.67e-06
lnc-OR4F29-3:11	4860	49	123	10.8109	26.5411	1.29574	Up	2.53e-08	4.26e-07
NEXN-AS1:3	8399	46	115	5.87263	14.3589	1.28986	Up	8.02e-08	1.23e-06
CERS6-AS1:9	668	38	95	60.9972	149.141	1.28986	Up	1.1e-06	1.37e-05
lnc-CTSZ-7:1	218	120	300	590.238	1443.16	1.28986	Up	3.63e-18	1.87e-16
lnc-AACS-5:1	1617	40	100	26.5248	64.8546	1.28986	Up	5.69e-07	7.5e-06
lnc-NTNG1-2:1	246	34	85	148.199	362.355	1.28986	Up	4.08e-06	4.48e-05
lnc-MFN1-1:2	1697	43	107	27.17	66.123	1.28314	Up	2.55e-07	3.56e-06
lnc-BCKDHB-1:2	1803	35	87	20.8149	50.6028	1.2816	Up	3.51e-06	3.9e-05
lnc-ZFAND1-1:3	568	29	72	54.746	132.934	1.27988	Up	2.55e-05	0.000231434
LINC01124:11	34908	253	628	7.77138	18.8662	1.27956	Up	7.03e-36	9.33e-34
lnc-HAX1-3:1	401	46	114	123.003	298.134	1.27726	Up	1.14e-07	1.7e-06
lnc-CTNNBIP1-1:1	1017	34	84	35.8476	86.6182	1.27279	Up	5.82e-06	6.2e-05
lnc-FAM84B-7:9	4326	85	210	21.0686	50.9077	1.27279	Up	6.45e-13	2.08e-11
lnc-NBN-1:24	13184	32	79	2.60259	6.28392	1.27172	Up	1.13e-05	0.000111332
LINC01176:11	5958	197	486	35.4543	85.5434	1.2707	Up	7.53e-28	6.88e-26
lnc-TMEM185B-1:2	1740	30	74	18.4874	44.5998	1.2705	Up	2.18e-05	0.000200224
lnc-MFSD14B-3:1	2162	67	165	33.2293	80.0348	1.26817	Up	2.13e-10	5.07e-09
lnc-BRMS1L-6:1	604	48	118	85.2132	204.878	1.26562	Up	8.45e-08	1.3e-06
lnc-CA8-13:3	871	35	86	43.0876	103.545	1.26492	Up	5e-06	5.36e-05
lnc-DHX57-6:1	1040	36	88	37.1169	88.736	1.25744	Up	4.29e-06	4.7e-05
lnc-ANKRD36B-3:9	1105	155	378	150.408	358.74	1.25405	Up	1.35e-21	8.66e-20
lnc-ITGA2-3:1	3031	71	173	25.1174	59.8564	1.25282	Up	1.17e-10	2.87e-09
lnc-TMEM71-1:2	870	62	151	76.4144	182.015	1.25214	Up	1.8e-09	3.69e-08
lnc-SLC26A5-1:1	373	85	207	244.35	581.985	1.25203	Up	1.82e-12	5.55e-11
lnc-GOLGA8H-119:8	3662	58	141	16.9829	40.3786	1.24951	Up	6.57e-09	1.23e-07
lnc-EYS-5:1	586	49	119	89.6605	212.961	1.24804	Up	1.03e-07	1.54e-06
PVT1:69	7191	63	153	9.39407	22.3127	1.24804	Up	1.55e-09	3.22e-08
lnc-DDX18-1:7	3105	26	63	8.97872	21.2779	1.24478	Up	0.000117748	0.000883094
lnc-RNMT-3:1	611	26	63	45.6284	108.131	1.24478	Up	0.000117748	0.000883336
lnc-VN1R2-1:2	676	48	116	76.1373	179.954	1.24095	Up	1.69e-07	2.44e-06
lnc-USP53-8:19	3245	75	181	24.7827	58.4944	1.23896	Up	6.39e-11	1.63e-09
lnc-COLEC10-1:13	781	31	74	42.5612	99.3645	1.22319	Up	3.77e-05	0.000323634
lnc-TAF1B-2:1	3231	31	74	10.2879	24.0185	1.22319	Up	3.77e-05	0.000323735
lnc-TUBAL3-3:1	692	44	105	68.1788	159.123	1.22275	Up	8.81e-07	1.11e-05
lnc-SLC38A1-4:1	601	44	105	78.502	183.217	1.22275	Up	8.81e-07	1.11e-05
lnc-SPRYD7-4:1	559	73	174	140.028	326.428	1.22106	Up	2.4e-10	5.69e-09
lnc-SSB-2:1	1863	34	81	19.569	45.5956	1.22032	Up	1.66e-05	0.000157487
lnc-FAXDC2-2:2	557	29	69	55.8272	129.911	1.21848	Up	7.32e-05	0.000581474
lnc-PLEKHB2-2:1	304	64	152	225.74	524.349	1.21586	Up	3.7e-09	7.21e-08
lnc-PLCG1-2:1	1160	40	95	36.9747	85.8848	1.21586	Up	3.26e-06	3.66e-05
lnc-PLCL1-3:1	3197	32	76	10.7327	24.93	1.21586	Up	3.22e-05	0.00028359
lnc-ABCA12-5:1	571	88	209	165.253	383.849	1.21586	Up	4.5e-12	1.32e-10
lnc-NPIPB15-2:4	2165	35	83	17.3346	40.2041	1.21369	Up	1.42e-05	0.000136457
lnc-FCGR2B-2:1	842	35	83	44.5716	103.375	1.21369	Up	1.42e-05	0.000136409
lnc-FOXD4L6-2:2	541	211	500	418.204	969.222	1.21262	Up	1.07e-26	9.27e-25
lnc-TFRC-2:1	1022	79	187	82.8856	191.885	1.21105	Up	6.84e-11	1.74e-09
lnc-MX1-4:4	3202	67	158	22.4366	51.7471	1.20563	Up	2.33e-09	4.73e-08
lnc-FXR1-3:1	231	42	99	194.958	449.442	1.20498	Up	2.38e-06	2.76e-05
lnc-ADAMTSL4-7:1	7533	45	106	6.40542	14.7567	1.204	Up	1.06e-06	1.33e-05
lnc-LRRFIP2-1:1	5351	110	259	22.0425	50.7593	1.20338	Up	2.09e-14	7.7e-13
lnc-GSG1L-1:9	4913	34	80	7.42053	17.0763	1.2024	Up	2.34e-05	0.000214477
lnc-NDUFS5-7:1	1015	83	195	87.6829	201.474	1.20023	Up	3.7e-11	9.68e-10
lnc-KNOP1-2:1	491	35	82	76.4345	175.139	1.19621	Up	2e-05	0.000184332
PVT1:75	13144	405	947	33.0393	75.5567	1.19338	Up	6.71e-48	1.29e-45
lnc-NAA35-6:7	570	36	84	67.7221	154.545	1.19033	Up	1.7e-05	0.000160352
SNHG6:19	583	33	77	60.6943	138.507	1.19033	Up	3.87e-05	0.000331425
LINC00504:8	1273	40	93	33.6926	76.6135	1.18517	Up	6.43e-06	6.73e-05
lnc-NDUFAB1-1:1	420	34	79	86.8025	197.255	1.18425	Up	3.29e-05	0.000289284
lnc-STON1-GTF2A1L-3:1	611	149	346	261.486	593.862	1.1834	Up	2.7e-18	1.41e-16
lnc-MASTL-6:1	448	51	118	122.066	276.22	1.17815	Up	4.12e-07	5.5e-06
lnc-TEKT1-2:1	3286	728	1679	237.556	535.838	1.17353	Up	2.14e-81	8.46e-79
lnc-AKAP1-7:1	12318	157	362	13.6667	30.819	1.17316	Up	7.87e-19	4.27e-17
lnc-CACNB2-1:1	3519	129	297	39.3073	88.5091	1.17103	Up	1.12e-15	4.68e-14
lnc-CBWD5-1:1	3476	137	315	42.2614	95.0345	1.16911	Up	1.69e-16	7.62e-15
lnc-CSRNP3-9:1	9361	67	154	7.67459	17.2524	1.16863	Up	8.79e-09	1.61e-07
lnc-GNG5-5:1	557	54	124	103.954	233.462	1.16725	Up	2.56e-07	3.57e-06
lnc-GPR33-14:1	1096	92	211	90.0078	201.894	1.16547	Up	1.76e-11	4.81e-10
lnc-EMP2-2:1	2543	116	266	48.9119	109.695	1.16524	Up	4.28e-14	1.54e-12
lnc-TPD52L1-4:1	2273	45	103	21.2283	47.5213	1.16258	Up	2.89e-06	3.31e-05
lnc-ZCCHC13-11:1	2396	45	103	20.1386	45.0818	1.16258	Up	2.89e-06	3.31e-05
THUMPD3-AS1:79	19437	70	160	3.86164	8.63259	1.16058	Up	5.48e-09	1.04e-07
lnc-PTP4A2-5:1	587	47	107	85.8544	191.16	1.15481	Up	2.1e-06	2.48e-05
lnc-MANBA-4:1	492	33	75	71.9203	159.863	1.15236	Up	7.57e-05	0.000600231
lnc-MSR1-7:1	3001	53	120	18.9371	41.934	1.14691	Up	5.79e-07	7.61e-06
SMC5-AS1:11	16704	62	140	3.97992	8.78938	1.14302	Up	7.17e-08	1.12e-06
lnc-PTP4A2-3:6	610	299	672	525.586	1155.29	1.13625	Up	5.18e-32	5.69e-30
lnc-GPAT2-6:1	399	338	758	908.336	1992.26	1.13311	Up	9.58e-36	1.26e-33
lnc-SAR1B-1:1	2393	392	879	175.649	385.209	1.13295	Up	3.57e-41	5.71e-39
lnc-LRRC37A-1:1	1670	38	85	24.3989	53.3769	1.1294	Up	3.34e-05	0.00029346
lnc-TMF1-1:1	1968	34	76	18.5249	40.4985	1.1284	Up	8.94e-05	0.000696741
lnc-ANKRD36B-3:7	796	214	478	288.273	629.746	1.12734	Up	5.81e-23	4.05e-21
MIR3936HG:21	6833	226	504	35.465	77.3517	1.12504	Up	4.73e-24	3.52e-22
GNAS-AS1:3	8968	58	129	6.93482	15.085	1.12118	Up	3.58e-07	4.86e-06
KCNQ1OT1:4	24669	998	2219	43.3792	94.3314	1.12073	Up	1.67e-99	8.94e-97
lnc-CHKA-1:1	662	153	340	247.82	538.606	1.11994	Up	1.29e-16	5.88e-15
lnc-SAMD11-13:3	694	8675	19243	13403.3	29078	1.11733	Up	0	0
lnc-EEF1B2-1:1	1411	56	124	42.5563	92.1606	1.11478	Up	6.81e-07	8.76e-06
LINC00894:50	5008	58	128	12.4184	26.8038	1.10996	Up	4.92e-07	6.52e-06
lnc-ENC1-5:1	3705	81	178	23.4423	50.3828	1.10382	Up	3.42e-09	6.73e-08
lnc-WRNIP1-34:2	5665	107	235	20.2529	43.5029	1.10299	Up	1.12e-11	3.11e-10
lnc-TXNDC11-1:1	415	44	96	113.686	242.59	1.09347	Up	1.72e-05	0.000161975
lnc-C4orf3-2:1	974	85	185	93.5756	199.188	1.08993	Up	2.46e-09	4.97e-08
lnc-TMEM211-7:1	13120	46	100	3.75947	7.99313	1.08823	Up	1.24e-05	0.000121779
lnc-GPR75-ASB3-5:1	514	46	100	95.9616	204.027	1.08823	Up	1.24e-05	0.000121735
lnc-GRAMD2A-6:1	1324	54	117	43.7329	92.672	1.08341	Up	2.43e-06	2.81e-05
FAM160A1-DT:19	4433	36	78	8.70778	18.4522	1.08341	Up	0.000122382	0.00091409
lnc-ACO1-1:1	1518	56	121	39.5566	83.5919	1.07944	Up	1.75e-06	2.11e-05
lnc-FOXD4-5:3	549	77	166	150.391	317.093	1.07619	Up	2.27e-08	3.83e-07
lnc-TMBIM4-6:1	16176	225	485	14.9147	31.4428	1.076	Up	1.06e-21	6.8e-20
LINC02211:2	2816	763	1640	290.532	610.748	1.07188	Up	5.33e-69	1.73e-66
lnc-C1R-1:1	504	47	101	99.9931	210.156	1.07156	Up	1.44e-05	0.00013806
lnc-RPLP1-12:46	9011	47	101	5.59278	11.7544	1.07156	Up	1.44e-05	0.000138108
lnc-ZC3HC1-4:1	1844	76	163	44.1932	92.6995	1.06874	Up	3.63e-08	5.98e-07
lnc-CLASP1-3:1	374	56	120	160.553	336.481	1.06747	Up	2.39e-06	2.77e-05
lnc-ALDH3B1-2:1	1834	42	90	24.5557	51.4628	1.06747	Up	4.5e-05	0.000380917
lnc-ZNF66-2:1	3048	59	126	20.7558	43.3517	1.06257	Up	1.46e-06	1.78e-05
TPT1-AS1:38	1509	163	348	115.825	241.847	1.06215	Up	1.06e-15	4.46e-14
lnc-FGGY-11:1	897	189	403	225.929	471.154	1.06033	Up	6.74e-18	3.38e-16
OLMALINC:1	1975	100	213	54.292	113.1	1.05879	Up	4.04e-10	9.21e-09
lnc-LIG3-1:2	4656	125	266	28.7872	59.9128	1.05743	Up	2.89e-12	8.67e-11
lnc-AFG1L-7:1	228	48	102	225.74	469.155	1.0554	Up	1.66e-05	0.000157467
lnc-ITGB1BP2-2:3	318	72	153	242.777	504.562	1.0554	Up	1.28e-07	1.91e-06
lnc-SORT1-1:1	2028	48	102	25.3791	52.7452	1.0554	Up	1.66e-05	0.000157412
lnc-HMGN1-1:14	341	40	85	125.779	261.406	1.0554	Up	8.59e-05	0.00067199
lnc-SAMD11-12:1	207	4589	9738	23771.2	49334.4	1.05338	Up	0	0
lnc-ATR-3:1	322	67	142	223.111	462.469	1.05159	Up	3.94e-07	5.28e-06
lnc-FOXO6-2:14	12468	79	167	6.79412	14.0466	1.04786	Up	4.1e-08	6.65e-07
ZRANB2-AS2:43	7890	44	93	5.97969	12.3611	1.04766	Up	4.4e-05	0.000374297
APTR:15	10611	83	175	8.38734	17.2955	1.04411	Up	2.13e-08	3.65e-07
lnc-AFG1L-5:1	1607	84	177	56.0488	115.507	1.04322	Up	1.81e-08	3.15e-07
RAP2C-AS1:10	3815	48	101	13.4912	27.7637	1.04119	Up	2.26e-05	0.000207259
lnc-TCP1-3:1	1185	59	124	53.3871	109.737	1.03949	Up	2.7e-06	3.09e-05
lnc-C9orf57-4:3	553	71	149	137.669	282.561	1.03736	Up	2.77e-07	3.85e-06
lnc-RPRML-6:1	2994	66	138	23.6371	48.3368	1.03207	Up	8.52e-07	1.08e-05
lnc-ZNF730-11:1	5134	220	459	45.9483	93.7578	1.02893	Up	2.8e-19	1.57e-17
lnc-CTAGE5-8:4	15599	58	121	3.98689	8.13466	1.02882	Up	4.31e-06	4.72e-05
lnc-FAP-3:1	1365	72	150	56.5591	115.242	1.02683	Up	3.18e-07	4.33e-06
lnc-C1QTNF3-AMACR-2:2	1398	97	202	74.399	151.529	1.02624	Up	2.94e-09	5.84e-08
lnc-CD164-1:1	4963	1384	2881	299.016	608.765	1.02566	Up	1.35e-111	8.36e-109
lnc-CYYR1-5:1	1428	49	102	36.7935	74.907	1.02565	Up	2.6e-05	0.000232111
lnc-SCML4-2:1	709	78	162	117.964	239.618	1.02238	Up	1.19e-07	1.77e-06
LINC01578:2	2683	222	460	88.7228	179.799	1.01901	Up	4.89e-19	2.69e-17
MIR29B2CHG:57	50791	872	1805	18.4091	37.2684	1.01754	Up	1.01e-69	3.36e-67
lnc-DHX40-1:1	1765	44	91	26.7307	54.0689	1.0163	Up	8.11e-05	0.000640564
lnc-AGBL3-2:1	487	45	93	99.0801	200.265	1.01524	Up	6.86e-05	0.00055374
lnc-CPLX4-1:1	678	76	157	120.195	242.84	1.01463	Up	2.22e-07	3.12e-06
lnc-SHANK2-10:1	939	49	101	55.9543	112.799	1.01144	Up	3.51e-05	0.000306559
lnc-B4GALT5-1:1	252	55	113	234.026	470.25	1.00676	Up	1.29e-05	0.000125243
lnc-SMG1-2:1	1137	107	219	100.908	201.992	1.00126	Up	1.39e-09	2.91e-08
lnc-HDAC2-12:2	558	44	90	84.5515	169.145	1.00036	Up	0.000109514	0.000826556
lnc-MB-6:1	1733	112	1	69.2982	0.605135	-6.83942	Down	3.17e-33	3.73e-31
lnc-P2RX3-4:1	2727	90	1	35.3883	0.384561	-6.52392	Down	1.37e-26	1.18e-24
lnc-RANBP3L-4:2	3613	71	1	21.0714	0.290257	-6.18181	Down	7.08e-21	4.35e-19
lnc-TFF3-1:1	1328	228	4	184.094	3.15873	-5.86495	Down	1.43e-63	4.06e-61
lnc-TNFRSF13C-1:1	1078	54	1	53.7128	0.972819	-5.78695	Down	8.65e-16	3.67e-14
lnc-NUDT12-11:1	549	51	1	99.6095	1.9102	-5.70449	Down	6.78e-15	2.58e-13
lnc-N4BP2-3:4	530	51	1	103.18	1.97868	-5.70449	Down	6.78e-15	2.58e-13
lnc-MMP23B-1:1	1808	47	1	27.8742	0.580032	-5.58665	Down	1.05e-13	3.63e-12
lnc-NDUFA10-7:1	1024	47	1	49.2154	1.02412	-5.58665	Down	1.05e-13	3.63e-12
lnc-HACL1-2:1	1778	43	1	25.9322	0.589819	-5.45833	Down	1.62e-12	4.94e-11
lnc-SCN4B-2:2	4362	85	2	20.8947	0.480834	-5.44145	Down	9.89e-24	7.21e-22
lnc-RRBP1-3:1	237	488	13	2207.87	57.5235	-5.26236	Down	1.35e-128	1.12e-125
lnc-PLPP5-3:1	508	37	1	78.0981	2.06437	-5.24152	Down	9.62e-11	2.38e-09
LINC00494:9	4161	34	1	8.76161	0.25203	-5.11953	Down	7.36e-10	1.61e-08
lnc-RINT1-4:1	1800	33	1	19.6582	0.58261	-5.07646	Down	1.45e-09	3.02e-08
lnc-SNX11-7:1	1456	64	2	47.1326	1.44052	-5.03206	Down	1.53e-17	7.48e-16
lnc-QPRT-3:2	2077	63	2	32.5242	1.00982	-5.00934	Down	3e-17	1.44e-15
lnc-MDN1-3:1	406	61	2	161.104	5.166	-4.9628	Down	1.15e-16	5.27e-15
lnc-BRF1-12:1	356	61	2	183.731	5.89156	-4.9628	Down	1.15e-16	5.28e-15
lnc-IRGM-1:1	860	30	1	37.4046	1.21942	-4.93895	Down	1.1e-08	1.98e-07
lnc-STK25-1:1	3751	30	1	8.57584	0.279578	-4.93895	Down	1.1e-08	1.98e-07
lnc-PTTG2-1:1	422	29	1	73.6866	2.48507	-4.89004	Down	2.15e-08	3.67e-07
lnc-SNRPN-8:139	1224	29	1	25.405	0.85678	-4.89004	Down	2.15e-08	3.67e-07
lnc-AVIL-2:1	436	28	1	68.8611	2.40527	-4.83942	Down	4.22e-08	6.83e-07
lnc-FBXO3-3:3	534	28	1	56.2237	1.96385	-4.83942	Down	4.22e-08	6.83e-07
lnc-SLC9C1-2:4	2754	55	2	21.4142	0.761582	-4.81342	Down	6.49e-15	2.48e-13
lnc-CAPN12-2:1	575	27	1	50.3499	1.82382	-4.78695	Down	8.26e-08	1.27e-06
lnc-MEF2C-5:1	355	25	1	75.5117	2.95408	-4.67592	Down	3.15e-07	4.31e-06
lnc-AKAP7-1:4	2105	49	2	24.9601	0.996388	-4.64677	Down	3.58e-13	1.19e-11
lnc-NEDD9-2:7	473	73	3	165.487	6.65136	-4.63693	Down	4.55e-19	2.51e-17
lnc-WDR77-1:2	723	24	1	35.5939	1.45048	-4.61703	Down	6.15e-07	7.98e-06
lnc-TOM1L1-3:1	874	24	1	29.4444	1.19988	-4.61703	Down	6.15e-07	7.98e-06
lnc-MTBP-1:1	1973	47	2	25.5431	1.06305	-4.58665	Down	1.35e-12	4.2e-11
GAS1RR:14	9127	23	1	2.70211	0.114901	-4.55563	Down	1.2e-06	1.49e-05
lnc-ACADL-2:1	696	22	1	33.8935	1.50675	-4.4915	Down	2.33e-06	2.72e-05
lnc-ABHD4-12:34	225	44	2	209.688	9.32176	-4.4915	Down	9.91e-12	2.79e-10
lnc-ZNF732-9:3	571	22	1	41.3132	1.8366	-4.4915	Down	2.33e-06	2.72e-05
lnc-DYRK2-15:1	661	22	1	35.6881	1.58653	-4.4915	Down	2.33e-06	2.72e-05
lnc-ZEB2-1:7	3008	22	1	7.84237	0.348636	-4.4915	Down	2.33e-06	2.72e-05
lnc-CCDC93-5:1	633	22	1	37.2668	1.65671	-4.4915	Down	2.33e-06	2.72e-05
lnc-TLR10-1:1	596	84	4	151.125	7.03824	-4.42438	Down	3.34e-21	2.08e-19
lnc-TP53BP2-7:1	246	21	1	91.5349	4.263	-4.42438	Down	4.52e-06	4.93e-05
lnc-GAPT-1:1	406	21	1	55.4621	2.583	-4.42438	Down	4.52e-06	4.93e-05
lnc-CWH43-8:1	357	21	1	63.0745	2.93753	-4.42438	Down	4.52e-06	4.93e-05
lnc-DET1-3:1	1611	21	1	13.9774	0.650961	-4.42438	Down	4.52e-06	4.94e-05
lnc-CD34-22:4	682	61	3	95.9065	4.61304	-4.37784	Down	1.28e-15	5.31e-14
lnc-ABCG2-1:2	610	61	3	107.227	5.15753	-4.37784	Down	1.28e-15	5.32e-14
lnc-SPCS2-1:1	1588	20	1	13.5046	0.660389	-4.35399	Down	8.76e-06	8.91e-05
lnc-CHRM5-1:1	1501	20	1	14.2874	0.698666	-4.35399	Down	8.76e-06	8.9e-05
lnc-RSPH6A-2:1	592	40	2	72.4504	3.5429	-4.35399	Down	1.39e-10	3.38e-09
lnc-YY1AP1-6:1	399	20	1	53.7477	2.62832	-4.35399	Down	8.76e-06	8.91e-05
lnc-LILRA4-2:4	839	20	1	25.5606	1.24994	-4.35399	Down	8.76e-06	8.9e-05
lnc-WDR34-2:2	970	20	1	22.1086	1.08113	-4.35399	Down	8.76e-06	8.9e-05
lnc-MBOAT4-4:1	419	20	1	51.1822	2.50286	-4.35399	Down	8.76e-06	8.89e-05
lnc-NPY-3:1	399	38	2	102.121	5.25663	-4.27999	Down	5.18e-10	1.17e-08
LINC01725:38	2637	38	2	15.4517	0.795372	-4.27999	Down	5.18e-10	1.17e-08
lnc-DHH-1:1	485	19	1	42.0063	2.16226	-4.27999	Down	1.69e-05	0.000159491
lnc-NOS2-8:1	778	19	1	26.1865	1.34794	-4.27999	Down	1.69e-05	0.000159545
lnc-MRPS28-2:1	2126	19	1	9.58281	0.493273	-4.27999	Down	1.69e-05	0.0001596
lnc-RPS25-5:1	523	38	2	77.9085	4.01032	-4.27999	Down	5.18e-10	1.17e-08
LINC00494:1	508	19	1	40.1045	2.06437	-4.27999	Down	1.69e-05	0.000159766
lnc-SH2D3A-1:2	512	19	1	39.7911	2.04824	-4.27999	Down	1.69e-05	0.000159931
ASB16-AS1:8	1052	19	1	19.366	0.996862	-4.27999	Down	1.69e-05	0.000159876
lnc-SYT13-2:3	567	19	1	35.9313	1.84956	-4.27999	Down	1.69e-05	0.000159821
lnc-XRCC3-5:1	795	19	1	25.6265	1.31912	-4.27999	Down	1.69e-05	0.00015971
lnc-HIST2H3PS2-6:1	982	19	1	20.7465	1.06792	-4.27999	Down	1.69e-05	0.000159655
lnc-ATG3-3:2	556	111	6	214.068	11.3169	-4.24152	Down	6.39e-27	5.67e-25
lnc-PSMB7-1:1	308	37	2	128.811	6.80973	-4.24152	Down	9.97e-10	2.15e-08
lnc-PDGFA-2:1	568	37	2	69.8483	3.6926	-4.24152	Down	9.97e-10	2.15e-08
LINC00649:30	2880	73	4	27.179	1.45653	-4.22189	Down	4.55e-18	2.33e-16
lnc-BRCA1-3:16	6025	18	1	3.20345	0.174058	-4.20199	Down	3.27e-05	0.000287687
lnc-CHST2-10:1	507	18	1	38.0686	2.06844	-4.20199	Down	3.27e-05	0.000287502
lnc-GTF2F2-4:1	692	18	1	27.8913	1.51546	-4.20199	Down	3.27e-05	0.000287594
lnc-IL6-3:9	6183	52	3	9.01793	0.50883	-4.14754	Down	4.65e-13	1.52e-11
lnc-CCDC171-5:1	338	17	1	53.9306	3.10266	-4.11953	Down	6.3e-05	0.000511644
lnc-FAM120A-2:1	1545	17	1	11.7984	0.678769	-4.11953	Down	6.3e-05	0.000511189
LINC00996:1	2043	68	4	35.6897	2.05325	-4.11953	Down	1.18e-16	5.37e-15
lnc-PRPF18-2:1	1978	17	1	9.21564	0.530181	-4.11953	Down	6.3e-05	0.000511341
lnc-FRG2-13:3	18420	17	1	0.989605	0.0569326	-4.11953	Down	6.3e-05	0.000511037
lnc-LIMA1-1:9	565	17	1	32.2629	1.8561	-4.11953	Down	6.3e-05	0.000511492
lnc-SH3GLB2-1:1	497	17	1	36.6771	2.11006	-4.11953	Down	6.3e-05	0.000511796
lnc-RTP5-5:4	911	17	1	20.0094	1.15115	-4.11953	Down	6.3e-05	0.000510886
lnc-THOC2-5:3	2605	33	2	13.5834	0.805143	-4.07646	Down	1.36e-08	2.4e-07
lnc-PRKCQ-7:1	362	49	3	145.141	8.69087	-4.06181	Down	3.26e-12	9.72e-11
lnc-MSH6-2:12	2726	32	2	12.5871	0.769405	-4.03206	Down	2.59e-08	4.36e-07
lnc-ADTRP-7:1	1300	16	1	13.1971	0.806691	-4.03206	Down	0.000121071	0.000905782
lnc-SEPHS2-1:1	528	16	1	32.4929	1.98617	-4.03206	Down	0.000121071	0.000905535
lnc-SERINC4-2:5	452	32	2	75.9127	4.64026	-4.03206	Down	2.59e-08	4.36e-07
lnc-CIB3-5:1	228	16	1	75.2468	4.59955	-4.03206	Down	0.000121071	0.000905287
lnc-TXNRD2-1:1	279	16	1	61.492	3.75878	-4.03206	Down	0.000121071	0.000906527
lnc-NPIPA7-13:1	248	16	1	69.1785	4.22862	-4.03206	Down	0.000121071	0.000906278
lnc-RNF146-1:1	619	32	2	55.4322	3.38836	-4.03206	Down	2.59e-08	4.36e-07
lnc-U2AF2-3:3	799	16	1	21.4722	1.31251	-4.03206	Down	0.000121071	0.00090603
lnc-IRF7-1:1	1036	16	1	16.5601	1.01226	-4.03206	Down	0.000121071	0.000905039
lnc-SYNE3-5:2	434	31	2	76.5905	4.83271	-3.98626	Down	4.95e-08	7.91e-07
lnc-DEXI-1:1	575	93	6	173.427	10.9429	-3.98626	Down	7.49e-22	4.87e-20
lnc-NYAP2-6:1	687	46	3	71.7966	4.57947	-3.97066	Down	2.26e-11	6.1e-10
lnc-STOM-7:3	1487	30	2	21.6328	1.41049	-3.93895	Down	9.45e-08	1.42e-06
lnc-BCL11A-2:1	2755	30	2	11.6762	0.761306	-3.93895	Down	9.45e-08	1.42e-06
lnc-ZC3H12B-18:1	932	45	3	51.7725	3.37564	-3.93895	Down	4.31e-11	1.12e-09
lnc-CD8B-3:2	574	30	2	56.0418	3.654	-3.93895	Down	9.45e-08	1.43e-06
lnc-OSBPL9-5:1	2871	30	2	11.2045	0.730546	-3.93895	Down	9.45e-08	1.43e-06
lnc-BECN2-9:1	567	29	2	54.8426	3.69911	-3.89004	Down	1.8e-07	2.57e-06
lnc-CARS2-4:1	705	29	2	44.1074	2.97503	-3.89004	Down	1.8e-07	2.57e-06
lnc-KIAA1191-4:1	1511	29	2	20.5796	1.38809	-3.89004	Down	1.8e-07	2.58e-06
lnc-CYB5R2-3:5	1054	43	3	43.7452	2.98491	-3.87337	Down	1.56e-10	3.76e-09
lnc-SYT13-8:1	1422	43	3	32.4244	2.21244	-3.87337	Down	1.56e-10	3.76e-09
LINC01284:1	873	43	3	52.815	3.60377	-3.87337	Down	1.56e-10	3.76e-09
lnc-TM9SF3-1:1	599	143	10	255.983	17.5075	-3.87001	Down	3.22e-32	3.56e-30
lnc-HSPB6-2:1	782	42	3	57.5898	4.02314	-3.83942	Down	2.95e-10	6.93e-09
lnc-ZNF79-1:1	827	42	3	54.4561	3.80423	-3.83942	Down	2.95e-10	6.92e-09
lnc-TMEM150A-4:2	6532	28	2	4.59637	0.321096	-3.83942	Down	3.42e-07	4.65e-06
lnc-CLIC6-4:1	811	42	3	55.5304	3.87928	-3.83942	Down	2.95e-10	6.92e-09
LINC01678:20	2588	110	8	45.5755	3.24173	-3.81342	Down	8.01e-25	6.19e-23
lnc-TXLNB-3:4	805	41	3	54.6123	3.90819	-3.80465	Down	5.59e-10	1.25e-08
lnc-LIG1-2:1	542	54	4	106.831	7.73947	-3.78695	Down	9.58e-13	3.01e-11
lnc-BEND4-4:1	560	27	2	51.6986	3.74535	-3.78695	Down	6.48e-07	8.37e-06
lnc-LINC02210-CRHR1-2:1	560	27	2	51.6986	3.74535	-3.78695	Down	6.48e-07	8.37e-06
lnc-EML4-1:1	1402	27	2	20.6499	1.496	-3.78695	Down	6.48e-07	8.36e-06
lnc-INO80C-1:7	3749	80	6	22.8811	1.67837	-3.76903	Down	3.04e-18	1.58e-16
lnc-KCNE1B-3:4	312	66	5	226.826	16.8061	-3.75453	Down	3.19e-15	1.26e-13
lnc-SDCBP-2:7	2040	26	2	13.6661	1.02814	-3.7325	Down	1.23e-06	1.51e-05
lnc-CCDC92-7:2	630	26	2	44.2523	3.3292	-3.7325	Down	1.23e-06	1.51e-05
lnc-DGLUCY-7:1	471	26	2	59.1909	4.45307	-3.7325	Down	1.23e-06	1.51e-05
lnc-NPIPB4-1:1	1665	52	4	33.4882	2.5194	-3.7325	Down	3.41e-12	1.01e-10
lnc-CXCR6-3:2	2741	52	4	20.3422	1.53039	-3.7325	Down	3.41e-12	1.01e-10
LINC00649:28	2570	90	7	37.5502	2.85638	-3.71656	Down	3.68e-20	2.17e-18
lnc-AFF3-1:1	852	115	9	144.731	11.0778	-3.70763	Down	2.35e-25	1.89e-23
lnc-MADD-2:1	539	25	2	49.7341	3.89127	-3.67592	Down	2.31e-06	2.71e-05
lnc-GNG13-5:1	3222	25	2	8.31988	0.650961	-3.67592	Down	2.31e-06	2.71e-05
lnc-SIRPG-2:1	712	25	2	37.6498	2.94578	-3.67592	Down	2.31e-06	2.71e-05
lnc-SLC39A8-2:1	603	25	2	44.4555	3.47827	-3.67592	Down	2.31e-06	2.71e-05
ENOX1-AS1:1	3907	36	3	9.88011	0.805246	-3.61703	Down	1.33e-08	2.35e-07
lnc-FH-1:1	7109	24	2	3.61997	0.295034	-3.61703	Down	4.36e-06	4.77e-05
lnc-AMZ2-3:1	1840	24	2	13.9861	1.13989	-3.61703	Down	4.36e-06	4.77e-05
lnc-ANGPTL1-3:3	2289	47	4	22.0168	1.83259	-3.58665	Down	7.97e-11	2e-09
lnc-FAM170B-1:1	490	93	8	203.512	17.1216	-3.57122	Down	3.6e-20	2.12e-18
lnc-MRPL19-3:1	1285	23	2	19.1923	1.63222	-3.55563	Down	8.19e-06	8.39e-05
lnc-BCL2L10-4:1	1025	23	2	24.0606	2.04624	-3.55563	Down	8.19e-06	8.37e-05
lnc-OSBPL7-3:2	2388	23	2	10.3275	0.878307	-3.55563	Down	8.19e-06	8.39e-05
lnc-MICU3-3:1	871	23	2	28.3147	2.40803	-3.55563	Down	8.19e-06	8.38e-05
lnc-HLA-DMA-3:2	596	23	2	41.3794	3.51912	-3.55563	Down	8.19e-06	8.37e-05
lnc-IQUB-3:1	2802	69	6	26.4048	2.24561	-3.55563	Down	3.08e-15	1.23e-13
LINC01871:10	1985	23	2	12.4242	1.05662	-3.55563	Down	8.19e-06	8.38e-05
lnc-MIOX-1:1	2448	23	2	10.0744	0.85678	-3.55563	Down	8.19e-06	8.39e-05
lnc-PIGF-1:2	2019	23	2	12.215	1.03883	-3.55563	Down	8.19e-06	8.38e-05
lnc-TENM1-1:1	1100	57	5	55.5629	4.76681	-3.54303	Down	9.17e-13	2.89e-11
lnc-GJA10-12:1	756	114	10	161.691	13.8717	-3.54303	Down	2.81e-24	2.12e-22
lnc-NEPRO-5:2	3371	79	7	25.1288	2.17766	-3.52849	Down	3.64e-17	1.73e-15
lnc-CYGB-4:1	2070	189	17	97.9026	8.6125	-3.50684	Down	5.17e-39	7.52e-37
lnc-SERPINB9-3:2	1939	33	3	18.249	1.62253	-3.4915	Down	8.7e-08	1.33e-06
lnc-RCHY1-5:1	436	22	2	54.1052	4.81054	-3.4915	Down	1.53e-05	0.00014612
lnc-UHRF1-5:2	1264	22	2	18.6629	1.65933	-3.4915	Down	1.53e-05	0.000146069
lnc-ZNF683-7:2	4888	33	3	7.23911	0.643637	-3.4915	Down	8.7e-08	1.33e-06
lnc-DIRAS2-9:1	576	44	4	81.9092	7.28263	-3.4915	Down	5.19e-10	1.17e-08
lnc-SUCLG1-9:1	216	22	2	109.212	9.71017	-3.4915	Down	1.53e-05	0.000146171
lnc-TIMM22-2:1	838	22	2	28.1502	2.50286	-3.4915	Down	1.53e-05	0.000146018
lnc-CHST7-4:1	2212	32	3	15.512	1.42229	-3.4471	Down	1.62e-07	2.35e-06
LINC01318:1	5347	32	3	6.41715	0.588385	-3.4471	Down	1.62e-07	2.35e-06
MEF2C-AS1:37	9814	42	4	4.58887	0.42743	-3.42438	Down	1.79e-09	3.69e-08
lnc-NOC2L-12:1	2464	189	18	82.2477	7.66095	-3.42438	Down	3.04e-38	4.31e-36
lnc-CASP3-5:1	686	42	4	65.649	6.11486	-3.42438	Down	1.79e-09	3.68e-08
lnc-PINX1-1:1	3398	21	2	6.62672	0.617245	-3.42438	Down	2.86e-05	0.000254894
lnc-C9-1:3	556	21	2	40.4993	3.7723	-3.42438	Down	2.86e-05	0.000254728
lnc-PTGDR-2:2	1949	21	2	11.5534	1.07614	-3.42438	Down	2.86e-05	0.000254811
lnc-KLF3-2:1	2165	115	11	56.9564	5.32826	-3.41812	Down	8.89e-24	6.51e-22
LINC00926:3	7961	83	8	11.1793	1.05384	-3.4071	Down	1.77e-17	8.61e-16
lnc-EMX2-3:4	781	31	3	42.5612	4.02829	-3.4013	Down	3.01e-07	4.17e-06
lnc-FUT8-1:2	1726	31	3	19.2586	1.82277	-3.4013	Down	3.01e-07	4.16e-06
lnc-UBLCP1-7:1	563	41	4	78.0869	7.45079	-3.38962	Down	3.33e-09	6.55e-08
lnc-ZNF827-2:1	4159	131	13	33.7742	3.27797	-3.36505	Down	1.51e-26	1.29e-24
lnc-TGFBR2-1:1	1916	151	15	84.5053	8.21006	-3.36358	Down	2.24e-30	2.27e-28
lnc-ARHGAP10-5:6	2492	60	6	25.817	2.52496	-3.35399	Down	8.06e-13	2.56e-11
HIF1A-AS2:5	533	20	2	40.2351	3.93508	-3.35399	Down	5.33e-05	0.000438396
PCBP1-AS1:253	2069	20	2	10.3651	1.01372	-3.35399	Down	5.33e-05	0.000438264
lnc-DNAJB6-5:1	546	20	2	39.2772	3.84139	-3.35399	Down	5.33e-05	0.000438132
lnc-SERPINB9-2:2	424	20	2	50.5786	4.94669	-3.35399	Down	5.33e-05	0.000437869
lnc-TATDN1-3:2	559	40	4	76.7275	7.5041	-3.35399	Down	6.16e-09	1.16e-07
lnc-NOX3-9:3	9460	60	6	6.80084	0.665136	-3.35399	Down	8.06e-13	2.56e-11
lnc-RPL30-3:6	531	20	2	40.3867	3.9499	-3.35399	Down	5.33e-05	0.000437737
lnc-FAM126B-1:2	3673	50	5	14.5966	1.42758	-3.35399	Down	6.98e-11	1.77e-09
lnc-MRPS16-1:5	623	20	2	34.4227	3.36661	-3.35399	Down	5.33e-05	0.000438
lnc-MOCS2-9:1	329	109	11	355.249	35.0629	-3.34082	Down	3.51e-22	2.35e-20
lnc-ACOT12-9:1	2534	49	5	20.7344	2.06925	-3.32485	Down	1.29e-10	3.14e-09
lnc-RNF145-5:1	602	58	6	103.308	10.4521	-3.30508	Down	2.74e-12	8.24e-11
lnc-ZNF80-1:1	1624	19	2	12.545	1.2915	-3.27999	Down	9.88e-05	0.000762255
lnc-MRNIP-1:6	741	19	2	27.494	2.8305	-3.27999	Down	9.88e-05	0.00076161
lnc-CD83-3:2	860	19	2	23.6896	2.43883	-3.27999	Down	9.88e-05	0.000761825
lnc-MAP3K7-3:4	436	38	4	93.4544	9.62109	-3.27999	Down	2.1e-08	3.59e-07
lnc-SOX30-4:1	690	38	4	59.0524	6.07941	-3.27999	Down	2.1e-08	3.59e-07
lnc-HDAC9-8:1	631	19	2	32.2869	3.32393	-3.27999	Down	9.88e-05	0.00076204
lnc-STARD5-1:2	476	123	13	277.077	28.6409	-3.27414	Down	1.97e-24	1.51e-22
lnc-PLCG2-8:1	2775	85	9	32.8442	3.40118	-3.27153	Down	2.78e-17	1.34e-15
lnc-SLC22A1-6:1	1233	66	7	57.3963	5.95368	-3.2691	Down	1.08e-13	3.73e-12
lnc-TK1-6:1	702	47	5	71.7899	7.46936	-3.26472	Down	4.36e-10	9.93e-09
lnc-TSPYL6-5:1	1150	28	3	26.1074	2.73573	-3.25446	Down	1.91e-06	2.28e-05
lnc-FAM237A-2:1	2651	28	3	11.3253	1.18676	-3.25446	Down	1.91e-06	2.27e-05
lnc-CPEB2-2:5	6324	28	3	4.74754	0.497485	-3.25446	Down	1.91e-06	2.27e-05
lnc-B4GALNT3-4:2	5284	28	3	5.68196	0.5954	-3.25446	Down	1.91e-06	2.28e-05
lnc-ZEB2-1:9	571	28	3	52.5805	5.5098	-3.25446	Down	1.91e-06	2.28e-05
lnc-ZBED4-1:2	1429	28	3	21.0101	2.20161	-3.25446	Down	1.91e-06	2.28e-05
lnc-YPEL5-5:1	1701	177	19	111.576	11.7139	-3.25174	Down	2.47e-34	3.07e-32
lnc-GORAB-1:1	2045	130	14	68.1636	7.17935	-3.24708	Down	1.47e-25	1.2e-23
lnc-MTMR9-3:1	2260	37	4	17.5548	1.8561	-3.24152	Down	3.86e-08	6.31e-07
lnc-UBE2L5-2:8	2496	46	5	19.7613	2.10076	-3.2337	Down	8.01e-10	1.74e-08
lnc-SFRP4-1:1	591	73	8	132.446	14.1956	-3.22189	Down	7.85e-15	2.97e-13
lnc-HTR7-1:2	3200	73	8	24.4611	2.62175	-3.22189	Down	7.85e-15	2.97e-13
lnc-FRMPD2-5:5	1964	27	3	14.7409	1.60188	-3.20199	Down	3.51e-06	3.9e-05
lnc-EPHX3-2:1	587	27	3	49.3206	5.35962	-3.20199	Down	3.51e-06	3.91e-05
LINC02328:42	1070	36	4	36.0763	3.92037	-3.20199	Down	7.07e-08	1.1e-06
lnc-TMEM138-4:1	1640	27	3	17.6532	1.91835	-3.20199	Down	3.51e-06	3.91e-05
lnc-USP48-1:1	839	27	3	34.5068	3.74982	-3.20199	Down	3.51e-06	3.9e-05
lnc-USP40-2:1	1718	63	7	39.3206	4.27293	-3.20199	Down	6.64e-13	2.14e-11
CLDN10-AS1:4	38670	27	3	0.748673	0.0813575	-3.20199	Down	3.51e-06	3.9e-05
lnc-SIKE1-2:2	552	36	4	69.9304	7.59926	-3.20199	Down	7.07e-08	1.1e-06
lnc-C1QTNF8-4:1	3733	27	3	7.75548	0.842779	-3.20199	Down	3.51e-06	3.9e-05
lnc-PAIP2-6:1	255	53	6	222.863	24.6753	-3.17502	Down	5.67e-11	1.45e-09
lnc-PQLC1-9:2	1169	44	5	40.359	4.48545	-3.16957	Down	2.68e-09	5.39e-08
lnc-OR2G6-2:2	967	35	4	38.8101	4.33795	-3.16135	Down	1.29e-07	1.92e-06
lnc-DHRS13-1:1	557	35	4	67.3776	7.53105	-3.16135	Down	1.29e-07	1.92e-06
lnc-DDX52-3:1	1736	87	10	53.7369	6.04089	-3.15308	Down	4.14e-17	1.95e-15
lnc-ASXL1-2:3	907	26	3	30.7375	3.46868	-3.14754	Down	6.43e-06	6.73e-05
lnc-ACTR3C-4:1	1905	26	3	14.6346	1.65149	-3.14754	Down	6.43e-06	6.73e-05
ANKRD44-IT1:1	1069	260	30	260.794	29.4303	-3.14754	Down	2.82e-48	5.47e-46
lnc-ZNF445-6:1	1668	43	5	27.6424	3.14358	-3.1364	Down	4.9e-09	9.41e-08
lnc-SNX11-11:1	1289	43	5	35.7699	4.06788	-3.1364	Down	4.9e-09	9.42e-08
lnc-BLCAP-1:6	717	43	5	64.3061	7.3131	-3.1364	Down	4.9e-09	9.4e-08
LINC00636:4	9470	43	5	4.86879	0.553695	-3.1364	Down	4.9e-09	9.4e-08
ITPKB-AS1:3	40234	120	14	3.19809	0.36491	-3.1316	Down	5.95e-23	4.14e-21
lnc-GRAP-4:1	2673	357	42	143.21	16.4779	-3.11953	Down	3.76e-65	1.09e-62
lnc-EFCAB11-4:1	294	34	4	124.004	14.268	-3.11953	Down	2.36e-07	3.32e-06
INE2:1	1874	34	4	19.4541	2.23842	-3.11953	Down	2.36e-07	3.32e-06
lnc-SERPINB9-1:4	1989	42	5	22.6421	2.63625	-3.10245	Down	8.92e-09	1.64e-07
LINC01588:65	2183	42	5	20.63	2.40197	-3.10245	Down	8.92e-09	1.63e-07
lnc-BTLA-4:1	2144	142	17	71.0176	8.31524	-3.09435	Down	1.3e-26	1.12e-24
lnc-KLHL1-9:1	1864	50	6	28.7625	3.37564	-3.09096	Down	3.42e-10	7.89e-09
lnc-LCOR-3:1	439	50	6	122.126	14.333	-3.09096	Down	3.42e-10	7.89e-09
lnc-TMEM41B-3:1	730	25	3	36.7215	4.30972	-3.09096	Down	1.17e-05	0.000115746
lnc-SYDE1-2:1	1394	83	10	63.8437	7.52294	-3.08517	Down	4.5e-16	1.95e-14
lnc-ZMYM3-1:5	2478	41	5	17.7413	2.11602	-3.06769	Down	1.62e-08	2.83e-07
lnc-MAG-2:1	435	57	7	140.504	16.8756	-3.0576	Down	2.41e-11	6.46e-10
lnc-CYB561D2-5:1	1023	57	7	59.7451	7.17584	-3.0576	Down	2.41e-11	6.46e-10
lnc-NFKB1-6:1	376	236	29	673.018	80.8837	-3.05673	Down	9.08e-43	1.51e-40
lnc-GIMAP5-1:1	1196	65	8	58.2754	7.01471	-3.05443	Down	9.42e-13	2.97e-11
lnc-MYBPC2-1:2	1957	40	5	21.9165	2.67935	-3.03206	Down	2.94e-08	4.9e-07
lnc-CREG1-3:5	7246	40	5	5.91922	0.72364	-3.03206	Down	2.94e-08	4.9e-07
lnc-HTR1B-1:6	8746	32	4	3.92323	0.479624	-3.03206	Down	7.82e-07	9.93e-06
lnc-HLA-DMA-2:1	657	48	6	78.3391	9.57715	-3.03206	Down	1.12e-09	2.41e-08
lnc-ILKAP-4:1	1511	32	4	22.7085	2.77617	-3.03206	Down	7.82e-07	9.92e-06
lnc-POLR1A-7:6	538	48	6	95.6669	11.6955	-3.03206	Down	1.12e-09	2.4e-08
lnc-NSFL1C-1:6	624	24	3	41.241	5.04182	-3.03206	Down	2.14e-05	0.000196344
LINC01259:1	2481	40	5	17.2876	2.11346	-3.03206	Down	2.94e-08	4.9e-07
lnc-MESD-5:1	1360	24	3	18.9223	2.31331	-3.03206	Down	2.14e-05	0.00019641
lnc-PKIA-1:1	3754	63	8	17.9949	2.23484	-3.00934	Down	3.07e-12	9.2e-11
lnc-OR7C1-2:1	551	63	8	122.6	15.2261	-3.00934	Down	3.07e-12	9.19e-11
lnc-L3HYPDH-1:5	729	55	7	80.898	10.0698	-3.00607	Down	7.86e-11	1.99e-09
lnc-HLA-DPA1-2:1	281	274	35	1045.56	130.621	-3.00081	Down	1.55e-48	3.04e-46
lnc-PPP1CC-2:1	788	86	11	117.024	14.6392	-2.9989	Down	3.43e-16	1.5e-14
lnc-HIST2H3PS2-14:4	353	39	5	118.466	14.8541	-2.99554	Down	5.31e-08	8.42e-07
lnc-F5-1:1	690	39	5	60.6064	7.59926	-2.99554	Down	5.31e-08	8.42e-07
lnc-TRMT1-1:1	1547	62	8	42.9738	5.42313	-2.98626	Down	5.53e-12	1.61e-10
lnc-ZNF506-5:2	1407	31	4	23.6249	2.98137	-2.98626	Down	1.42e-06	1.72e-05
lnc-NTAN1-5:1	2757	54	7	21.002	2.66264	-2.9796	Down	1.42e-10	3.44e-09
lnc-AGRP-1:26	5050	100	13	21.233	2.69962	-2.97548	Down	1.78e-18	9.38e-17
lnc-WNT2B-2:1	2559	23	3	9.63741	1.22942	-2.97066	Down	3.88e-05	0.000332429
lnc-HLA-DMB-1:1	1919	46	6	25.7031	3.27889	-2.97066	Down	3.66e-09	7.15e-08
lnc-HEY1-2:1	583	23	3	42.3021	5.39639	-2.97066	Down	3.88e-05	0.000332533
PWRN1:28	4159	23	3	5.92982	0.756455	-2.97066	Down	3.88e-05	0.000332325
LINC02532:30	6189	23	3	3.98483	0.508337	-2.97066	Down	3.88e-05	0.000332637
lnc-LAT-4:1	1223	61	8	53.4818	6.85984	-2.9628	Down	9.95e-12	2.8e-10
lnc-ABO-33:2	719	213	28	317.653	40.8394	-2.95942	Down	1.46e-37	2.02e-35
lnc-AP3D1-1:1	553	38	5	73.682	9.4819	-2.95806	Down	9.58e-08	1.44e-06
lnc-ATPAF1-1:2	869	38	5	46.8885	6.03394	-2.95806	Down	9.58e-08	1.44e-06
lnc-FCRL1-1:3	2143	432	57	216.155	27.8935	-2.95406	Down	1.95e-74	7.19e-72
lnc-PLCG2-1:12	794	53	7	71.5745	9.24545	-2.95263	Down	2.55e-10	6.02e-09
lnc-TLR6-2:2	550	53	7	103.327	13.3471	-2.95263	Down	2.55e-10	6.02e-09
lnc-RBMS3-5:1	572	60	8	112.476	14.6671	-2.93895	Down	1.79e-11	4.87e-10
lnc-CD47-1:1	695	30	4	46.2849	6.03567	-2.93895	Down	2.55e-06	2.94e-05
lnc-DEPP1-3:1	868	45	6	55.5899	7.24907	-2.93895	Down	6.58e-09	1.23e-07
LINC01237:6	895	30	4	35.9419	4.68692	-2.93895	Down	2.55e-06	2.94e-05
lnc-KLF7-1:25	8905	82	11	9.87376	1.29542	-2.93018	Down	3.56e-15	1.4e-13
lnc-MALT1-7:4	12916	52	7	4.31696	0.568356	-2.92515	Down	4.57e-10	1.04e-08
lnc-TMEM161B-10:3	582	74	10	136.336	18.0189	-2.91959	Down	8.95e-14	3.12e-12
LINC01375:1	1860	37	5	21.33	2.81908	-2.91959	Down	1.72e-07	2.48e-06
lnc-IPCEF1-2:1	498	37	5	79.6664	10.5291	-2.91959	Down	1.72e-07	2.48e-06
lnc-GOLGA8A-1:5	665	37	5	59.6599	7.88495	-2.91959	Down	1.72e-07	2.48e-06
lnc-ZNF112-2:1	1881	37	5	21.0919	2.78761	-2.91959	Down	1.72e-07	2.48e-06
lnc-IL24-1:1	466	74	10	170.274	22.5043	-2.91959	Down	8.95e-14	3.13e-12
lnc-FAM122C-1:1	3090	37	5	12.8394	1.69692	-2.91959	Down	1.72e-07	2.48e-06
lnc-NAT9-1:4	3209	59	8	19.7145	2.61439	-2.91471	Down	3.2e-11	8.46e-10
PCF11-AS1:21	1222	22	3	19.3043	2.57455	-2.90653	Down	7.01e-05	0.000565217
LINC02422:19	1222	22	3	19.3043	2.57455	-2.90653	Down	7.01e-05	0.00056505
lnc-ATP6V1G3-1:3	4331	44	6	10.8935	1.45283	-2.90653	Down	1.18e-08	2.11e-07
LINC01891:4	1811	44	6	26.0518	3.47443	-2.90653	Down	1.18e-08	2.1e-07
lnc-TM9SF3-2:1	831	22	3	28.3873	3.78591	-2.90653	Down	7.01e-05	0.000564884
lnc-RHEBL1-1:1	445	22	3	53.0109	7.06988	-2.90653	Down	7.01e-05	0.000565383
lnc-ZC3H12D-20:1	2363	88	12	39.9321	5.32559	-2.90653	Down	4.56e-16	1.97e-14
lnc-POLE4-15:16	2179	88	12	43.304	5.7753	-2.90653	Down	4.56e-16	1.97e-14
lnc-TMEM201-2:1	515	22	3	45.8056	6.10892	-2.90653	Down	7.01e-05	0.000564717
lnc-EBF3-8:1	2843	44	6	16.595	2.21322	-2.90653	Down	1.18e-08	2.11e-07
lnc-OR6C70-3:1	285	22	3	82.7714	11.0389	-2.90653	Down	7.01e-05	0.00056555
lnc-TRIM13-7:3	1847	22	3	12.772	1.70335	-2.90653	Down	7.01e-05	0.000564551
lnc-GOLGA8A-2:3	1349	22	3	17.4869	2.33217	-2.90653	Down	7.01e-05	0.000565717
lnc-HEXDC-1:1	1655	51	7	33.0427	4.43558	-2.89713	Down	8.19e-10	1.78e-08
lnc-ZBED4-2:1	3894	29	4	7.98555	1.07725	-2.89004	Down	4.59e-06	5e-05
lnc-ASAP1-6:1	820	29	4	37.9216	5.1156	-2.89004	Down	4.59e-06	5e-05
lnc-NRG1-2:11	13793	29	4	2.25446	0.304125	-2.89004	Down	4.59e-06	5e-05
lnc-DPH5-5:1	5093	36	5	7.57934	1.02955	-2.88006	Down	3.09e-07	4.23e-06
lnc-CLEC4C-1:1	1150	36	5	33.5666	4.55956	-2.88006	Down	3.09e-07	4.24e-06
lnc-APIP-1:11	2202	36	5	17.5302	2.38124	-2.88006	Down	3.09e-07	4.24e-06
lnc-TDRP-5:2	735	36	5	52.5192	7.134	-2.88006	Down	3.09e-07	4.23e-06
lnc-MEF2C-9:6	922	50	7	58.1489	7.96192	-2.86856	Down	1.46e-09	3.05e-08
LINC01197:25	8054	107	15	14.2454	1.95313	-2.86664	Down	5.37e-19	2.95e-17
lnc-PRSS2-6:2	739	530	75	769.014	106.431	-2.85309	Down	8.7e-88	3.9e-85
lnc-HECA-11:1	1637	21	3	13.7554	1.92187	-2.83942	Down	0.000126161	0.000938725
lnc-SLC39A10-10:1	1551	28	4	19.3575	2.70457	-2.83942	Down	8.24e-06	8.4e-05
lnc-CHRNA10-2:1	712	21	3	31.6258	4.41867	-2.83942	Down	0.000126161	0.000938469
lnc-ZNF708-4:1	445	21	3	50.6013	7.06988	-2.83942	Down	0.000126161	0.000936939
lnc-EFCAB12-2:14	1911	21	3	11.7831	1.64631	-2.83942	Down	0.000126161	0.000938214
lnc-PEF1-1:2	4540	21	3	4.95982	0.692973	-2.83942	Down	0.000126161	0.000937959
lnc-KCTD7-1:3	1178	21	3	19.1151	2.67071	-2.83942	Down	0.000126161	0.000937194
lnc-TNIK-7:1	558	21	3	40.3541	5.63816	-2.83942	Down	0.000126161	0.000937704
BIN3-IT1:3	1839	28	4	16.326	2.28102	-2.83942	Down	8.24e-06	8.41e-05
SNHG10:12	7489	21	3	3.00676	0.420096	-2.83942	Down	0.000126161	0.000937449
lnc-UQCRHL-7:1	2732	28	4	10.9896	1.53543	-2.83942	Down	8.24e-06	8.4e-05
LINC01550:24	1411	28	4	21.2781	2.97292	-2.83942	Down	8.24e-06	8.41e-05
lnc-NSUN5-2:1	549	28	4	54.6875	7.64079	-2.83942	Down	8.24e-06	8.41e-05
lnc-ARHGAP28-10:7	12360	76	11	6.59322	0.933308	-2.82056	Down	1.14e-13	3.93e-12
lnc-ADAM19-2:2	1992	185	27	99.583	14.2143	-2.80856	Down	3.6e-31	3.77e-29
lnc-ORMDL2-1:5	1611	27	4	17.9709	2.60384	-2.78695	Down	1.47e-05	0.000140374
lnc-TMEM121-2:21	537	243	36	485.216	70.3038	-2.78695	Down	3.75e-40	5.73e-38
lnc-COBLL1-3:1	785	27	4	36.8805	5.34369	-2.78695	Down	1.47e-05	0.000140423
lnc-NMT1-1:1	573	27	4	50.5256	7.32076	-2.78695	Down	1.47e-05	0.000140472
lnc-SOBP-1:1	815	47	7	61.8362	9.00723	-2.7793	Down	8.24e-09	1.52e-07
lnc-STARD5-1:1	547	47	7	92.1326	13.4203	-2.7793	Down	8.24e-09	1.52e-07
lnc-SHC3-5:3	1358	181	27	142.916	20.8504	-2.77702	Down	3.5e-30	3.5e-28
lnc-THAP6-3:1	2028	287	43	151.746	22.2357	-2.77071	Down	7.4e-47	1.39e-44
lnc-RCOR1-4:1	2949	159	24	57.8129	8.53468	-2.75998	Down	1.58e-26	1.35e-24
lnc-EPB41-3:1	1209	66	10	58.5356	8.6741	-2.75453	Down	8.93e-12	2.54e-10
lnc-ADAM22-6:1	1719	33	5	20.5845	3.05032	-2.75453	Down	1.75e-06	2.1e-05
SNHG3:6	206	33	5	171.771	25.4538	-2.75453	Down	1.75e-06	2.1e-05
lnc-RPS14-4:1	212	244	37	1234.12	183.028	-2.75335	Down	8.23e-40	1.23e-37
lnc-WSCD2-1:1	2482	46	7	19.8728	2.95765	-2.74827	Down	1.46e-08	2.57e-07
lnc-AIM2-2:1	1942	85	13	46.9324	7.02012	-2.74101	Down	1.01e-14	3.8e-13
lnc-RBP7-3:1	319	26	4	87.3948	13.1498	-2.7325	Down	2.62e-05	0.00023361
lnc-TMEM243-1:1	1629	65	10	42.7853	6.43768	-2.7325	Down	1.58e-11	4.32e-10
lnc-CXXC1-3:2	482	26	4	57.8401	8.70289	-2.7325	Down	2.62e-05	0.000233687
GLYCTK-AS1:8	3382	39	6	12.365	1.86049	-2.7325	Down	2.11e-07	2.98e-06
lnc-NBEA-2:3	868	52	8	64.2372	9.66542	-2.7325	Down	1.8e-09	3.69e-08
lnc-ARHGEF2-1:3	470	169	26	385.56	58.0131	-2.7325	Down	8.09e-28	7.37e-26
lnc-SP110-7:1	438	39	6	95.4758	14.3657	-2.7325	Down	2.11e-07	2.98e-06
lnc-TAAR9-3:2	9223	97	15	11.2772	1.70557	-2.72509	Down	1.61e-16	7.28e-15
lnc-PPP1R10-1:3	605	58	9	102.796	15.6005	-2.72012	Down	2.23e-10	5.3e-09
lnc-P2RX5-2:3	1967	219	34	119.383	18.127	-2.71939	Down	1.97e-35	2.59e-33
lnc-POLE4-15:18	8411	431	67	54.9455	8.35368	-2.71752	Down	3.78e-68	1.16e-65
lnc-HECA-4:1	1473	45	7	32.7576	4.98363	-2.71656	Down	2.58e-08	4.34e-07
TAPT1-AS1:6	2165	90	14	44.5746	6.78142	-2.71656	Down	2.24e-15	9.03e-14
lnc-NTNG1-3:2	428	32	5	80.1695	12.2511	-2.71014	Down	3.1e-06	3.49e-05
LY86-AS1:7	2936	160	25	58.4341	8.92965	-2.71014	Down	3.41e-26	2.85e-24
lnc-PPIAL4C-4:21	447	32	5	76.7618	11.7304	-2.71014	Down	3.1e-06	3.49e-05
lnc-SLC35G5-2:1	1165	102	16	93.8808	14.4027	-2.70449	Down	3.59e-17	1.71e-15
lnc-RIOK2-9:1	353	51	8	154.917	23.7665	-2.70449	Down	3.17e-09	6.25e-08
lnc-PRSS37-3:1	925	261	41	302.553	46.4828	-2.70242	Down	1.17e-41	1.9e-39
lnc-IL6-3:26	4048	63	10	16.6879	2.59066	-2.68742	Down	4.87e-11	1.26e-09
lnc-TLE1-7:1	931	44	7	50.6764	7.88495	-2.68414	Down	4.54e-08	7.28e-07
lnc-EPS15L1-2:1	2134	69	11	34.6703	5.40566	-2.68116	Down	6.09e-12	1.75e-10
lnc-C6orf229-3:1	1445	488	78	362.122	56.6079	-2.6774	Down	1.01e-75	3.78e-73
lnc-SYPL1-2:1	212	25	4	126.447	19.7868	-2.67592	Down	4.63e-05	0.000390904
lnc-DPH3-3:1	2035	81	13	42.6799	6.6993	-2.67147	Down	9.58e-14	3.33e-12
lnc-NR2F2-2:4	4856	56	9	12.3655	1.94363	-2.66949	Down	6.88e-10	1.51e-08
XIST:17	6115	93	15	16.3076	2.57244	-2.66433	Down	1.52e-15	6.27e-14
lnc-UBA6-2:1	2458	99	16	43.1873	6.82635	-2.66142	Down	1.93e-16	8.64e-15
lnc-TRIM25-2:1	429	37	6	92.4799	14.6671	-2.65655	Down	6.57e-07	8.46e-06
lnc-MARCKSL1-1:1	763	43	7	60.4292	9.62109	-2.65097	Down	7.98e-08	1.23e-06
IFNG-AS1:6	1833	202	33	118.166	18.88	-2.64588	Down	7.13e-32	7.77e-30
lnc-LYPD4-2:3	584	55	9	100.984	16.1614	-2.6435	Down	1.21e-09	2.57e-08
lnc-CCNI-3:1	1344	61	10	48.6669	7.80282	-2.64087	Down	1.5e-10	3.63e-09
lnc-RASA1-6:6	2373	433	71	195.656	31.377	-2.64054	Down	2.24e-66	6.66e-64
lnc-GRAPL-3:3	1921	133	22	74.2381	12.0101	-2.62791	Down	2.47e-21	1.55e-19
lnc-B4GALNT3-6:1	286	30	5	112.476	18.3339	-2.61703	Down	9.62e-06	9.59e-05
HCG23:4	1853	30	5	17.36	2.82973	-2.61703	Down	9.62e-06	9.6e-05
lnc-E2F6-6:1	2238	24	4	11.4988	1.87435	-2.61703	Down	8.17e-05	0.000643361
lnc-BID-6:1	361	24	4	71.2864	11.6199	-2.61703	Down	8.17e-05	0.000643175
lnc-SLC35F5-4:1	1358	48	8	37.9004	6.1779	-2.61703	Down	1.71e-08	2.98e-07
PKIA-AS1:1	2011	24	4	12.7968	2.08592	-2.61703	Down	8.17e-05	0.000643732
LINC02352:7	1030	30	5	31.2311	5.09077	-2.61703	Down	9.62e-06	9.59e-05
lnc-DUSP14-3:1	794	30	5	40.5138	6.60389	-2.61703	Down	9.62e-06	9.58e-05
lnc-SNX20-5:3	708	24	4	36.348	5.92485	-2.61703	Down	8.17e-05	0.00064299
lnc-TBXAS1-4:1	475	24	4	54.1777	8.83114	-2.61703	Down	8.17e-05	0.000643917
lnc-GTF2IRD2B-3:1	822	30	5	39.1338	6.37894	-2.61703	Down	9.62e-06	9.59e-05
lnc-ZNF582-8:1	3593	24	4	7.16237	1.16749	-2.61703	Down	8.17e-05	0.000643546
lnc-FAM104A-7:1	464	30	5	69.3276	11.3006	-2.61703	Down	9.62e-06	9.6e-05
LINC01890:8	5763	65	11	12.0939	2.00168	-2.595	Down	5.67e-11	1.45e-09
lnc-FRMD7-4:3	10360	53	9	5.48553	0.911031	-2.59006	Down	3.68e-09	7.18e-08
lnc-ABCG2-2:2	582	53	9	97.6463	16.217	-2.59006	Down	3.68e-09	7.18e-08
lnc-PREX2-2:1	2356	47	8	21.3907	3.56095	-2.58665	Down	2.98e-08	4.96e-07
lnc-SLC35F5-3:12	7555	146	25	20.7215	3.47021	-2.57803	Down	8.12e-23	5.63e-21
lnc-SELENOI-1:5	7548	35	6	4.97209	0.833624	-2.57638	Down	2.01e-06	2.38e-05
lnc-BCL2L15-2:1	330	35	6	113.725	19.0672	-2.57638	Down	2.01e-06	2.39e-05
lnc-ZFP36L1-2:8	747	70	12	100.48	16.8466	-2.57638	Down	1.23e-11	3.41e-10
lnc-CAPN3-2:1	370	35	6	101.431	17.0059	-2.57638	Down	2.01e-06	2.38e-05
CYTOR:130	502	35	6	74.7596	12.5342	-2.57638	Down	2.01e-06	2.39e-05
lnc-SRRM5-2:1	2506	35	6	14.9758	2.51085	-2.57638	Down	2.01e-06	2.38e-05
lnc-NPIPB7-1:1	371	29	5	83.816	14.1334	-2.56812	Down	1.68e-05	0.000159144
lnc-NTN4-3:1	685	29	5	45.3952	7.65473	-2.56812	Down	1.68e-05	0.000159199
lnc-MS4A6A-1:3	549	29	5	56.6407	9.55099	-2.56812	Down	1.68e-05	0.000159089
lnc-SERPINE3-5:1	286	29	5	108.726	18.3339	-2.56812	Down	1.68e-05	0.000158979
lnc-USE1-4:1	2560	29	5	12.1468	2.04824	-2.56812	Down	1.68e-05	0.000159034
lnc-TLE4-12:3	1654	185	32	119.933	20.2892	-2.56345	Down	2.38e-28	2.23e-26
lnc-GPR68-3:1	478	46	8	103.189	17.5514	-2.55563	Down	5.19e-08	8.25e-07
lnc-RNF145-3:1	460	46	8	107.227	18.2382	-2.55563	Down	5.19e-08	8.26e-07
lnc-WASHC2C-4:1	2924	132	23	48.406	8.249	-2.5529	Down	1.49e-20	8.94e-19
lnc-C7-2:1	4941	63	11	13.6719	2.33469	-2.54991	Down	1.71e-10	4.1e-09
lnc-RGMA-23:1	3497	85	15	26.0631	4.49828	-2.53456	Down	1.27e-13	4.35e-12
lnc-PLCD3-4:10	8794	51	9	6.21851	1.07326	-2.53456	Down	1.11e-08	1.99e-07
lnc-PLEKHG2-1:1	2481	79	14	34.1431	5.91769	-2.52849	Down	1.01e-12	3.17e-11
LINC01284:4	3688	62	11	18.0262	3.1279	-2.52683	Down	2.96e-10	6.93e-09
lnc-SHISAL1-1:1	4709	287	51	65.3516	11.3577	-2.52455	Down	2.04e-42	3.32e-40
lnc-GPR68-2:1	811	28	5	37.0203	6.46546	-2.51749	Down	2.94e-05	0.000260354
lnc-IL32-1:2	1401	28	5	21.43	3.74268	-2.51749	Down	2.94e-05	0.000260439
lnc-CPEB2-2:6	7707	28	5	3.89561	0.680354	-2.51749	Down	2.94e-05	0.000260523
lnc-IL13RA2-3:1	1634	56	10	36.7484	6.41798	-2.51749	Down	2.38e-09	4.82e-08
lnc-ANTXR2-3:3	674	134	24	213.181	37.3424	-2.51319	Down	1.68e-20	1e-18
lnc-TUBB1-1:3	2522	134	24	56.9721	9.97968	-2.51319	Down	1.68e-20	1e-18
lnc-CPPED1-1:1	2751	117	21	45.6035	8.00533	-2.51011	Down	4.69e-18	2.39e-16
lnc-AGBL2-1:1	481	39	7	86.9405	15.2617	-2.51011	Down	7.37e-07	9.45e-06
lnc-TATDN1-4:2	569	50	9	94.2238	16.5875	-2.50599	Down	1.92e-08	3.33e-07
lnc-SMC4-3:1	361	61	11	181.186	31.9548	-2.50337	Down	5.11e-10	1.16e-08
lnc-SCGN-6:1	489	44	8	96.4821	17.1566	-2.4915	Down	1.56e-07	2.26e-06
lnc-FGD4-8:1	1796	44	8	26.2693	4.67126	-2.4915	Down	1.56e-07	2.27e-06
lnc-FGF9-3:18	7286	33	6	4.85655	0.8636	-2.4915	Down	6.09e-06	6.48e-05
lnc-LILRA4-2:5	944	33	6	37.4839	6.66546	-2.4915	Down	6.09e-06	6.48e-05
lnc-LIX1-2:2	399	33	6	88.6837	15.7699	-2.4915	Down	6.09e-06	6.47e-05
lnc-TOMM7-6:1	2592	93	17	38.4725	6.87804	-2.48376	Down	1.79e-14	6.61e-13
ASAP1-IT1:1	1179	71	13	64.5725	11.5633	-2.48137	Down	2.38e-11	6.4e-10
lnc-BDH1-8:1	615	49	9	85.4326	15.3468	-2.47685	Down	3.31e-08	5.49e-07
lnc-ABR-5:4	1010	76	14	80.6854	14.5364	-2.47264	Down	5.15e-12	1.5e-10
lnc-INPP5B-1:1	775	38	7	52.5756	9.47211	-2.47264	Down	1.27e-06	1.56e-05
lnc-PARN-14:1	4959	433	80	93.626	16.9179	-2.46836	Down	1.37e-61	3.76e-59
lnc-CYB561A3-1:1	656	27	5	44.1329	7.99313	-2.46502	Down	5.09e-05	0.000426153
PRKCQ-AS1:45	4682	27	5	6.18351	1.11993	-2.46502	Down	5.09e-05	0.000425762
lnc-ZNF574-1:6	1890	135	25	76.5905	13.8717	-2.46502	Down	3.21e-20	1.89e-18
CD27-AS1:1	1736	27	5	16.677	3.02044	-2.46502	Down	5.09e-05	0.000426022
lnc-PLEKHA2-4:1	2831	27	5	10.2265	1.85217	-2.46502	Down	5.09e-05	0.000425892
FAM53B-AS1:9	936	70	13	80.1909	14.5653	-2.46091	Down	4.09e-11	1.07e-09
lnc-NOTCH2-2:1	2136	258	48	129.515	23.5663	-2.45833	Down	3.53e-37	4.83e-35
lnc-AMZ1-8:1	1453	43	8	31.7326	5.77398	-2.45833	Down	2.69e-07	3.74e-06
lnc-C3orf58-2:1	4474	161	30	38.5863	7.03195	-2.45609	Down	9.62e-24	7.03e-22
lnc-BRD2-4:1	410	91	17	237.991	43.4826	-2.4524	Down	5.27e-14	1.88e-12
lnc-SSTR3-2:1	732	251	47	367.676	67.3345	-2.44902	Down	4.65e-36	6.23e-34
lnc-ADAM10-8:1	559	32	6	61.382	11.2562	-2.4471	Down	1.05e-05	0.000104443
lnc-NPL-2:2	4999	32	6	6.86388	1.25869	-2.4471	Down	1.05e-05	0.000104406
lnc-SNX5-1:2	7986	32	6	4.29658	0.787903	-2.4471	Down	1.05e-05	0.000104481
SLC9A9-AS1:1	518	32	6	66.2404	12.1471	-2.4471	Down	1.05e-05	0.000104368
lnc-ADAMTS1-2:1	2629	69	13	28.1424	5.18565	-2.44015	Down	7.01e-11	1.78e-09
KLF3-AS1:19	14063	74	14	5.6423	1.044	-2.43416	Down	1.51e-11	4.15e-10
lnc-HSCB-7:1	1349	58	11	46.1019	8.55128	-2.43061	Down	2.6e-09	5.22e-08
MEF2C-AS1:15	1754	42	8	25.6757	4.78312	-2.42438	Down	4.62e-07	6.14e-06
lnc-WSB1-1:1	1284	42	8	35.0741	6.53395	-2.42438	Down	4.62e-07	6.14e-06
lnc-TDRP-6:1	585	63	12	115.475	21.5118	-2.42438	Down	5.57e-10	1.25e-08
lnc-YIF1A-6:4	1843	68	13	39.5627	7.39722	-2.41909	Down	1.2e-10	2.94e-09
lnc-CCDC184-3:2	3645	68	13	20.0039	3.74021	-2.41909	Down	1.2e-10	2.94e-09
lnc-TLE4-12:2	795	94	18	126.784	23.7441	-2.41673	Down	3.35e-14	1.21e-12
lnc-CLVS1-1:7	6288	73	14	12.4484	2.33489	-2.41453	Down	2.59e-11	6.92e-10
lnc-P2RY2-5:1	357	52	10	156.184	29.3753	-2.41058	Down	2.08e-08	3.57e-07
lnc-KMT2E-6:2	565	26	5	49.3432	9.28052	-2.41058	Down	8.8e-05	0.000687698
lnc-TGFBRAP1-13:1	1843	52	10	30.2539	5.69017	-2.41058	Down	2.08e-08	3.57e-07
lnc-CATSPERB-1:1	1596	130	25	87.34	16.427	-2.41058	Down	4.65e-19	2.56e-17
lnc-RAG1-3:1	402	26	5	69.3506	13.0435	-2.41058	Down	8.8e-05	0.000687895
lnc-MAN2A1-7:1	1908	26	5	14.6116	2.74816	-2.41058	Down	8.8e-05	0.000687305
lnc-CASP4-3:2	352	26	5	79.2015	14.8963	-2.41058	Down	8.8e-05	0.000687502
lnc-ZNF395-2:4	9852	181	35	19.6996	3.72558	-2.40263	Down	7.14e-26	5.92e-24
lnc-CD69-1:1	605	31	6	54.9426	10.4003	-2.4013	Down	1.81e-05	0.000169786
lnc-DLX2-4:17	664	31	6	50.0606	9.47619	-2.4013	Down	1.81e-05	0.000169844
lnc-ATE1-5:6	541	98	19	194.237	36.8304	-2.39885	Down	1.24e-14	4.63e-13
lnc-BHLHA9-3:1	2038	72	14	37.8818	7.20401	-2.39463	Down	4.41e-11	1.14e-09
lnc-TAPT1-5:1	1701	36	7	22.6935	4.31563	-2.39463	Down	3.77e-06	4.18e-05
lnc-AUNIP-6:1	3653	72	14	21.1342	4.0191	-2.39463	Down	4.41e-11	1.14e-09
lnc-TOMM70-3:1	543	77	15	152.053	28.9696	-2.39196	Down	9.53e-12	2.69e-10
lnc-RAVER2-3:1	387	46	9	127.453	24.3883	-2.3857	Down	1.67e-07	2.42e-06
lnc-NEDD9-2:8	614	97	19	169.397	32.4516	-2.38405	Down	2.11e-14	7.74e-13
ADAMTS9-AS2:8	14794	199	39	14.4235	2.76458	-2.38329	Down	4.84e-28	4.48e-26
lnc-MECP2-2:10	1745	51	10	31.3384	6.00973	-2.38256	Down	3.55e-08	5.87e-07
lnc-PPP1R18-1:2	1156	158	31	146.555	28.1225	-2.38165	Down	1.49e-22	1.02e-20
lnc-ANLN-6:1	1639	61	12	39.9074	7.67808	-2.37784	Down	1.62e-09	3.37e-08
lnc-GOLGB1-1:2	450	66	13	157.266	30.2957	-2.37602	Down	3.49e-10	8.03e-09
LINC01278:27	1433	76	15	56.8683	10.9773	-2.3731	Down	1.62e-11	4.44e-10
lnc-SPATA9-2:1	9701	81	16	8.95305	1.72963	-2.37191	Down	3.51e-12	1.04e-10
lnc-TOPAZ1-6:1	4060	55	11	14.5258	2.8413	-2.35399	Down	1.29e-08	2.29e-07
lnc-IQGAP3-2:2	2180	60	12	29.5119	5.77265	-2.35399	Down	2.76e-09	5.51e-08
lnc-POFUT2-6:2	1435	45	9	33.6251	6.5772	-2.35399	Down	2.85e-07	3.95e-06
lnc-SPATA9-4:2	337	35	7	111.363	21.7831	-2.35399	Down	6.45e-06	6.74e-05
LINC00174:9	2146	40	8	19.9863	3.90941	-2.35399	Down	1.35e-06	1.65e-05
lnc-PLEKHM1-2:1	2853	30	6	11.2751	2.20546	-2.35399	Down	3.1e-05	0.000274039
lnc-XYLT1-5:1	2755	35	7	13.6223	2.66457	-2.35399	Down	6.45e-06	6.74e-05
lnc-IGSF11-5:7	57273	40	8	0.748881	0.146484	-2.35399	Down	1.35e-06	1.65e-05
lnc-PPIAL4F-3:13	2675	40	8	16.0339	3.13629	-2.35399	Down	1.35e-06	1.65e-05
lnc-UBLCP1-10:1	3712	368	74	106.302	20.9062	-2.34617	Down	1.29e-49	2.57e-47
lnc-RNF145-1:1	2176	700	141	344.939	67.9533	-2.34372	Down	9.86e-93	4.73e-90
lnc-AMZ2-5:6	991	233	47	252.107	49.7365	-2.34166	Down	6.32e-32	6.91e-30
lnc-AKAP13-6:2	712	143	29	215.357	42.7138	-2.33395	Down	4.3e-20	2.52e-18
lnc-KCNJ5-2:1	2879	517	105	192.554	38.2471	-2.33184	Down	1.56e-68	4.9e-66
lnc-PAQR9-7:1	712	128	26	192.767	38.2952	-2.33162	Down	4.09e-18	2.1e-16
lnc-GRAMD4-2:7	8346	39	8	5.01059	1.00522	-2.31747	Down	2.3e-06	2.7e-05
lnc-PRKN-17:2	372	34	7	98.0028	19.7336	-2.31217	Down	1.1e-05	0.000108658
lnc-SYPL1-3:1	394	63	13	171.454	34.6017	-2.3089	Down	1.7e-09	3.51e-08
lnc-RNF149-3:1	621	29	6	50.0736	10.1324	-2.30508	Down	5.29e-05	0.000435887
lnc-SH2D3A-2:1	686	29	6	45.329	9.17229	-2.30508	Down	5.29e-05	0.000435624
lnc-ANO10-4:1	1053	29	6	29.5306	5.97549	-2.30508	Down	5.29e-05	0.000435756
lnc-N4BP2-3:2	574	29	6	54.1737	10.962	-2.30508	Down	5.29e-05	0.000436018
lnc-CPN2-3:2	3529	82	17	24.9152	5.05182	-2.30215	Down	6.22e-12	1.79e-10
TSPOAP1-AS1:39	7793	197	41	27.1059	5.51734	-2.29656	Down	1.25e-26	1.08e-24
lnc-SEPSECS-3:1	560	96	20	183.817	37.4535	-2.2951	Down	1.07e-13	3.7e-12
lnc-RTRAF-2:3	549	110	23	214.844	43.9345	-2.28986	Down	1.87e-15	7.59e-14
lnc-HLX-3:2	13467	110	23	8.7584	1.79105	-2.28986	Down	1.87e-15	7.58e-14
lnc-CRIPT-1:3	4067	43	9	11.337	2.3207	-2.2884	Down	8.21e-07	1.04e-05
lnc-UBLCP1-10:2	2664	372	78	149.731	30.7051	-2.28582	Down	1.25e-48	2.48e-46
lnc-PLEKHM1-3:6	1332	62	13	49.9103	10.235	-2.28582	Down	2.87e-09	5.7e-08
lnc-PNMA1-2:1	460	81	17	188.812	38.7562	-2.28445	Down	1.05e-11	2.94e-10
lnc-MALT1-2:1	2330	128	27	58.9056	12.1523	-2.27718	Down	1.2e-17	5.95e-16
lnc-GTDC1-5:1	574	71	15	132.632	27.405	-2.27492	Down	2.24e-10	5.32e-09
lnc-FRAT1-6:1	292	52	11	190.952	39.5058	-2.27307	Down	6.25e-08	9.84e-07
lnc-EIF2AK2-1:1	750	52	11	74.3438	15.3809	-2.27307	Down	6.25e-08	9.83e-07
lnc-FAM86B2-7:1	622	33	7	56.8887	11.8021	-2.2691	Down	1.86e-05	0.000172575
LINC02397:30	7622	113	24	15.8969	3.30212	-2.26728	Down	1.15e-15	4.8e-14
lnc-LRRC72-3:1	3743	230	49	65.8887	13.7286	-2.26284	Down	2.59e-30	2.61e-28
lnc-TSTD1-1:2	1097	89	19	86.9934	18.1634	-2.25987	Down	1.39e-12	4.31e-11
lnc-RCAN1-6:1	3219	444	95	147.899	30.9495	-2.25662	Down	7.67e-57	1.87e-54
lnc-ECH1-5:1	493	56	12	121.799	25.5261	-2.25446	Down	2.25e-08	3.8e-07
DSCR9:16	2813	42	9	16.0097	3.35524	-2.25446	Down	1.38e-06	1.69e-05
lnc-SGTB-5:1	769	28	6	39.0422	8.1823	-2.25446	Down	8.98e-05	0.000699977
lnc-SLC25A15-9:1	2828	42	9	15.9247	3.33744	-2.25446	Down	1.38e-06	1.69e-05
lnc-ZC3H12B-3:1	1212	181	39	160.132	33.7452	-2.24651	Down	5.63e-24	4.17e-22
lnc-DTNBP1-16:1	19676	454	98	24.7413	5.22324	-2.2439	Down	1.08e-57	2.69e-55
lnc-FCRL1-1:1	560	125	27	239.345	50.5622	-2.24296	Down	5.65e-17	2.64e-15
lnc-ADIPOQ-2:1	1846	148	32	85.9672	18.179	-2.24152	Down	8.04e-20	4.62e-18
lnc-CD34-7:6	7280	60	13	8.83736	1.87268	-2.23851	Down	8.09e-09	1.49e-07
lnc-CXorf36-46:7	1379	115	25	89.4203	19.0119	-2.2337	Down	1.18e-15	4.9e-14
CADM3-AS1:8	1019	69	15	72.6069	15.4372	-2.2337	Down	6.29e-10	1.4e-08
lnc-HLA-DMB-1:2	1746	165	36	101.331	21.6226	-2.22846	Down	8.76e-22	5.66e-20
lnc-FCRL2-1:1	388	142	31	392.427	83.7878	-2.22761	Down	6.1e-19	3.33e-17
lnc-MAF-7:2	4116	32	7	8.33638	1.7835	-2.22471	Down	3.14e-05	0.000277141
lnc-CCDC66-1:1	1478	32	7	23.2155	4.96677	-2.22471	Down	3.14e-05	0.00027732
lnc-PCBP1-2:1	3903	32	7	8.79132	1.88083	-2.22471	Down	3.14e-05	0.00027723
TSPOAP1-AS1:41	726	73	16	107.817	23.1118	-2.22189	Down	2.28e-10	5.4e-09
lnc-GFI1B-3:1	1565	41	9	28.0913	6.03085	-2.21969	Down	2.33e-06	2.72e-05
lnc-ADAM19-2:9	1932	50	11	27.7502	5.97085	-2.21649	Down	1.76e-07	2.53e-06
lnc-KCNJ4-2:1	541	36	8	71.3523	15.5076	-2.20199	Down	1.1e-05	0.000109234
lnc-LY75-1:1	1402	81	18	61.9498	13.464	-2.20199	Down	2.98e-11	7.9e-10
lnc-ROS1-3:1	1067	63	14	63.311	13.7599	-2.20199	Down	4.87e-09	9.37e-08
lnc-EMCN-1:1	2236	67	15	32.1296	7.0351	-2.19126	Down	1.75e-09	3.61e-08
lnc-GAPDH-4:2	2434	165	37	72.6886	15.9416	-2.18893	Down	2.45e-21	1.53e-19
lnc-CTSF-2:1	2039	49	11	25.7681	5.65752	-2.18734	Down	2.95e-07	4.08e-06
lnc-MAX-2:8	14519	369	83	27.2516	5.99504	-2.1845	Down	1.05e-45	1.91e-43
lnc-CD96-4:1	2408	40	9	17.8117	3.91955	-2.18407	Down	3.9e-06	4.3e-05
lnc-TBC1D20-1:1	1047	31	7	31.7481	7.01136	-2.17891	Down	5.28e-05	0.000435175
lnc-DERL2-1:1	4506	115	26	27.3659	6.05108	-2.17711	Down	3.28e-15	1.29e-13
MEF2C-AS1:25	17978	599	136	35.7263	7.9332	-2.17101	Down	1.38e-72	4.97e-70
lnc-MGAT1-4:4	2659	44	10	17.7434	3.94396	-2.16957	Down	1.38e-06	1.69e-05
lnc-ZCCHC7-2:11	2835	132	30	49.9256	11.0973	-2.16957	Down	3.5e-17	1.67e-15
LINC00426:16	2854	149	34	55.9803	12.4933	-2.16377	Down	3.75e-19	2.09e-17
lnc-CYGB-1:1	3080	35	8	12.1848	2.72389	-2.16135	Down	1.85e-05	0.000171467
lnc-GAPDH-2:2	330	166	38	539.383	120.759	-2.15918	Down	4.05e-21	2.51e-19
lnc-EFCAB12-2:15	1181	83	19	75.3583	16.8715	-2.15918	Down	2.98e-11	7.9e-10
lnc-LPIN2-2:1	1049	83	19	84.8409	18.9945	-2.15918	Down	2.98e-11	7.89e-10
lnc-EQTN-2:1	4715	48	11	10.916	2.44659	-2.15759	Down	4.91e-07	6.51e-06
lnc-ATP6V1E2-8:3	855	65	15	81.5173	18.3982	-2.14754	Down	4.84e-09	9.33e-08
lnc-SMIM14-2:1	2648	104	24	42.1132	9.50482	-2.14754	Down	1.12e-13	3.87e-12
lnc-RNASET2-2:2	433	82	19	203.062	46.0168	-2.14169	Down	4.93e-11	1.27e-09
lnc-HECTD2-4:1	1181	69	16	62.6472	14.2076	-2.14059	Down	1.74e-09	3.59e-08
lnc-NOX3-4:5	837	30	7	38.4325	8.77048	-2.1316	Down	8.83e-05	0.00068869
lnc-SH3KBP1-3:2	737	30	7	43.6472	9.9605	-2.1316	Down	8.83e-05	0.000688886
lnc-TNNT1-1:1	4141	30	7	7.76817	1.77273	-2.1316	Down	8.83e-05	0.000689083
lnc-LSM3-3:1	1757	30	7	18.3085	4.17808	-2.1316	Down	8.83e-05	0.00068928
lnc-TDP1-3:1	313	381	89	1305.22	298.192	-2.12998	Down	1.05e-45	1.91e-43
lnc-NPIPB4-3:2	739	124	29	179.92	41.1533	-2.12828	Down	7.13e-16	3.04e-14
lnc-PLEKHG5-3:2	536	47	11	94.0234	21.5218	-2.12722	Down	8.15e-07	1.03e-05
CARMN:37	5131	111	26	23.1966	5.314	-2.12604	Down	2.44e-14	8.92e-13
lnc-MARF1-1:2	541	64	15	126.849	29.0767	-2.12517	Down	8.01e-09	1.48e-07
lnc-BRF1-9:3	524	2961	694	6059.12	1388.92	-2.12514	Down	0	0
lnc-ZNF30-3:2	5302	85	20	17.1902	3.95586	-2.11953	Down	2.94e-11	7.8e-10
lnc-IGFBP7-1:2	744	34	8	49.0014	11.2763	-2.11953	Down	3.08e-05	0.0002721
lnc-SPATA32-2:7	8693	255	60	31.4538	7.23823	-2.11953	Down	6.2e-31	6.37e-29
lnc-FAM167B-2:1	2800	68	16	26.0408	5.99256	-2.11953	Down	2.87e-09	5.72e-08
lnc-RRAS-5:2	550	34	8	66.2856	15.2538	-2.11953	Down	3.08e-05	0.000272188
lnc-SYNE3-1:9	1374	55	13	42.9219	9.92218	-2.11298	Down	1.03e-07	1.55e-06
lnc-SART3-2:1	2096	55	13	28.1368	6.50433	-2.11298	Down	1.03e-07	1.55e-06
lnc-GTF2H2-7:4	296	431	102	1561.31	361.376	-2.11118	Down	6.32e-51	1.31e-48
lnc-ASPH-5:5	3581	38	9	11.3784	2.63566	-2.11007	Down	1.08e-05	0.000107041
lnc-LYRM4-3:3	1291	38	9	31.5617	7.31083	-2.11007	Down	1.08e-05	0.000107119
lnc-PPP2R2D-1:1	808	38	9	50.4284	11.681	-2.11007	Down	1.08e-05	0.00010708
IFNG-AS1:1	1131	59	14	55.9361	12.9812	-2.10735	Down	3.69e-08	6.08e-07
lnc-CCDC68-4:1	1745	618	147	379.748	88.3431	-2.10385	Down	5.73e-72	1.98e-69
lnc-AFAP1L2-3:1	351	42	10	128.305	29.8774	-2.10245	Down	3.81e-06	4.21e-05
lnc-PLEKHD1-4:1	527	46	11	93.5944	21.8893	-2.09619	Down	1.35e-06	1.65e-05
lnc-ARMC1-5:1	2494	839	201	360.718	84.5182	-2.09354	Down	1.81e-96	9.33e-94
lnc-MSH6-3:1	341	54	13	169.802	39.9797	-2.08651	Down	1.7e-07	2.46e-06
lnc-PFKFB3-13:3	3749	87	21	24.8832	5.87428	-2.08269	Down	2.87e-11	7.63e-10
VAV3-AS1:4	12489	364	88	31.2519	7.38934	-2.08043	Down	1.73e-42	2.83e-40
RAB11B-AS1:9	9840	33	8	3.59602	0.8526	-2.07646	Down	5.11e-05	0.000426761
lnc-SRD5A3-4:1	497	66	16	142.394	33.7609	-2.07646	Down	7.79e-09	1.44e-07
LINC02422:23	3563	70	17	21.0661	5.00361	-2.07388	Down	2.8e-09	5.57e-08
lnc-RHCE-2:5	599	74	18	132.467	31.5135	-2.07159	Down	1e-09	2.16e-08
lnc-CHP2-1:1	2904	406	99	149.911	35.7511	-2.06804	Down	7.49e-47	1.39e-44
lnc-GPX7-1:2	6079	82	20	14.4639	3.45023	-2.06769	Down	1.3e-10	3.17e-09
lnc-STARD10-3:1	1104	98	24	95.1831	22.7978	-2.06181	Down	2.21e-12	6.69e-11
lnc-CCDC175-2:1	2505	49	12	20.9745	5.0237	-2.06181	Down	7.88e-07	9.99e-06
lnc-DR1-1:1	9327	49	12	5.63322	1.34924	-2.06181	Down	7.88e-07	9.99e-06
lnc-EFCAB11-3:1	1640	151	37	98.727	23.6597	-2.06102	Down	2.59e-18	1.35e-16
lnc-GMNN-4:1	465	69	17	159.111	38.3395	-2.05313	Down	4.58e-09	8.83e-08
lnc-MYO1G-1:1	1911	73	18	40.9605	9.87785	-2.05196	Down	1.64e-09	3.41e-08
lnc-HNRNPA2B1-15:1	3918	81	20	22.1678	5.35323	-2.04999	Down	2.13e-10	5.07e-09
lnc-SMIM20-1:1	483	165	41	366.302	89.0199	-2.04083	Down	1.21e-19	6.84e-18
lnc-NEMP2-6:1	2175	36	9	17.7479	4.33944	-2.03206	Down	2.94e-05	0.000261029
lnc-PPIF-1:3	1534	36	9	25.164	6.15273	-2.03206	Down	2.94e-05	0.000260945
lnc-NUDT13-4:1	1070	32	8	32.0678	7.84074	-2.03206	Down	8.43e-05	0.000661617
lnc-BPHL-9:1	1805	48	12	28.5146	6.97196	-2.03206	Down	1.29e-06	1.58e-05
lnc-ZNF385C-4:3	1956	48	12	26.3133	6.43373	-2.03206	Down	1.29e-06	1.58e-05
MEF2C-AS1:16	6977	56	14	8.60641	2.10431	-2.03206	Down	1.64e-07	2.37e-06
lnc-SF3B1-4:1	1578	260	65	176.673	43.1973	-2.03206	Down	6.3e-30	6.28e-28
lnc-VGLL4-8:1	2554	36	9	15.1142	3.69549	-2.03206	Down	2.94e-05	0.00026086
lnc-CALR3-6:1	803	112	28	149.556	36.5673	-2.03206	Down	1.01e-13	3.5e-12
lnc-MDH1B-8:2	438	116	29	283.979	69.4344	-2.03206	Down	3.67e-14	1.32e-12
PPP3CB-AS1:11	1058	44	11	44.5933	10.9033	-2.03206	Down	3.65e-06	4.05e-05
lnc-DMC1-3:2	441	52	13	126.435	30.914	-2.03206	Down	4.59e-07	6.11e-06
lnc-SPN-4:1	652	32	8	52.6266	12.8675	-2.03206	Down	8.43e-05	0.000661427
lnc-CXCL12-5:1	505	100	25	212.33	51.9158	-2.03206	Down	2.13e-12	6.46e-11
lnc-MRPL17-1:1	479	36	9	80.5879	19.7041	-2.03206	Down	2.94e-05	0.000261114
lnc-NIPSNAP3B-2:1	3413	167	42	52.4666	12.9052	-2.02345	Down	1.16e-19	6.62e-18
lnc-CCL27-2:1	6938	107	27	16.5368	4.08113	-2.01864	Down	4.54e-13	1.48e-11
lnc-KIAA0825-2:1	2225	87	22	41.9268	10.3692	-2.01558	Down	7.34e-11	1.86e-09
TSIX:1	37027	248	63	7.18184	1.78432	-2.00898	Down	3.23e-28	3.02e-26
lnc-RUFY4-5:1	2869	55	14	20.5558	5.11739	-2.00607	Down	2.67e-07	3.71e-06
lnc-LRRC18-110:1	2582	51	13	21.1795	5.28005	-2.00405	Down	7.5e-07	9.6e-06
lnc-TAAR9-3:5	2062	86	22	44.7211	11.1888	-1.9989	Down	1.19e-10	2.93e-09
TEX26-AS1:33	14369	39	10	2.91032	0.729834	-1.99554	Down	1.69e-05	0.000159853
lnc-CD3D-9:1	1493	35	9	25.1369	6.32169	-1.99142	Down	4.83e-05	0.000406187
lnc-SSBP2-5:5	632	35	9	59.3818	14.934	-1.99142	Down	4.83e-05	0.000406062
lnc-ZNF44-2:1	2885	66	17	24.5302	6.17951	-1.98899	Down	1.98e-08	3.43e-07
lnc-ZNF280B-6:1	390	1519	392	4176.34	1054.08	-1.98626	Down	8.93e-162	9.77e-159
lnc-QDPR-5:1	3134	116	30	39.6882	10.0386	-1.98315	Down	9.18e-14	3.2e-12
lnc-CLLU1OS-1:5	436	81	21	199.205	50.5107	-1.9796	Down	5.36e-10	1.21e-08
lnc-BEND4-6:1	969	50	13	55.3285	14.0692	-1.97548	Down	1.22e-06	1.5e-05
lnc-FAM45A-6:1	1587	123	32	83.1057	21.1458	-1.97458	Down	1.95e-14	7.2e-13
LINC01215:1	3584	142	37	42.4838	10.8264	-1.97236	Down	2e-16	8.96e-15
lnc-NYAP2-7:1	2369	138	36	62.4621	15.9363	-1.97066	Down	5.5e-16	2.37e-14
lnc-SLC9C1-2:12	1121	241	63	230.523	58.9367	-1.96767	Down	9.15e-27	8.02e-25
lnc-GPR65-18:1	566	65	17	123.14	31.498	-1.96697	Down	3.21e-08	5.33e-07
lnc-KIAA0040-4:1	5415	65	17	12.8712	3.29231	-1.96697	Down	3.21e-08	5.33e-07
lnc-ZNF609-1:1	554	42	11	81.291	20.8225	-1.96495	Down	9.72e-06	9.67e-05
lnc-CYB5RL-4:1	431	42	11	104.49	26.7649	-1.96495	Down	9.72e-06	9.68e-05
lnc-TNK2-2:9	4924	137	36	29.8336	7.66717	-1.96017	Down	8.86e-16	3.75e-14
lnc-SLCO4C1-4:1	559	232	61	445.019	114.438	-1.95931	Down	1.1e-25	9.03e-24
lnc-CLEC16A-2:5	2378	848	223	382.373	98.343	-1.95908	Down	1.61e-89	7.34e-87
lnc-RNF6-5:1	2110	38	10	19.311	4.97013	-1.95806	Down	2.76e-05	0.000245889
lnc-TES-2:1	1949	38	10	20.9062	5.3807	-1.95806	Down	2.76e-05	0.000245809
lnc-MCUR1-3:1	3834	38	10	10.6276	2.73526	-1.95806	Down	2.76e-05	0.000246049
lnc-JPH4-1:18	658	57	15	92.8863	23.9065	-1.95806	Down	2.51e-07	3.51e-06
lnc-MIA3-1:1	1302	38	10	31.295	8.05452	-1.95806	Down	2.76e-05	0.000245969
lnc-TCTN3-2:1	2555	57	15	23.9214	6.15674	-1.95806	Down	2.51e-07	3.51e-06
lnc-NBPF1-2:7	652	72	19	118.41	30.5602	-1.95406	Down	6.69e-09	1.25e-07
lnc-GMNN-5:1	3980	303	80	81.6323	21.0794	-1.95331	Down	6.08e-33	6.99e-31
lnc-ZBED4-11:1	865	34	9	42.1469	10.9113	-1.9496	Down	7.87e-05	0.000622872
lnc-MRPL16-1:1	564	34	9	64.6402	16.7345	-1.9496	Down	7.87e-05	0.000622692
lnc-ROCK1-1:1	1562	49	13	33.637	8.72796	-1.94633	Down	1.98e-06	2.35e-05
lnc-PDHX-1:1	704	45	12	68.5398	17.8755	-1.93895	Down	5.57e-06	5.95e-05
lnc-CALCRL-1:1	1810	324	87	191.942	50.4071	-1.92897	Down	1.47e-34	1.87e-32
lnc-NEDD9-2:9	761	52	14	73.2692	19.2927	-1.92515	Down	1.14e-06	1.41e-05
lnc-TLR10-2:1	5870	52	14	9.49878	2.50115	-1.92515	Down	1.14e-06	1.41e-05
lnc-STEAP1B-2:1	2592	74	20	30.6125	8.09181	-1.91959	Down	6.23e-09	1.17e-07
lnc-MUC20-67:22	490	37	10	80.9671	21.402	-1.91959	Down	4.48e-05	0.000379747
lnc-GTF2F2-6:1	892	37	10	44.4774	11.7567	-1.91959	Down	4.48e-05	0.000379629
lnc-PERP-2:13	13180	118	32	9.59996	2.54616	-1.91471	Down	2.09e-13	7.05e-12
lnc-BTK-1:1	673	188	51	299.534	79.4705	-1.91423	Down	1.67e-20	1e-18
lnc-HIST1H2AG-6:3	676	136	37	215.722	57.3992	-1.91007	Down	3.42e-15	1.34e-13
lnc-NUMA1-4:1	483	33	9	73.2604	19.541	-1.90653	Down	0.000127668	0.000947359
lnc-ARHGAP10-5:4	2695	33	9	13.1298	3.50215	-1.90653	Down	0.000127668	0.000947102
lnc-MXRA5-8:1	539	33	9	65.649	17.5107	-1.90653	Down	0.000127668	0.000946845
lnc-MIEN1-1:1	6116	2807	768	492.128	131.687	-1.90191	Down	1.3e-280	3.57e-277
lnc-DIS3-6:1	448	40	11	95.7381	25.7493	-1.89456	Down	2.55e-05	0.000231451
lnc-C9orf152-5:1	1778	933	257	562.669	151.584	-1.89217	Down	6.51e-94	3.18e-91
lnc-CLIC6-6:1	2336	192	53	88.1315	23.7932	-1.88911	Down	1.45e-20	8.74e-19
lnc-HOXD3-2:1	1782	83	23	49.9428	13.5354	-1.88354	Down	1.2e-09	2.56e-08
lnc-C12orf49-8:1	485	36	10	79.5909	21.6226	-1.88006	Down	7.22e-05	0.000573715
lnc-RABEP2-6:1	2471	126	35	54.6765	14.8541	-1.88006	Down	6.54e-14	2.31e-12
lnc-FAM207A-6:1	671	36	10	57.5285	15.6289	-1.88006	Down	7.22e-05	0.000573882
lnc-GTF2F2-4:2	1219	90	25	79.1665	21.5074	-1.88006	Down	2.51e-10	5.95e-09
lnc-TNFAIP8L1-2:1	1797	61	17	36.3986	9.92091	-1.87534	Down	2.15e-07	3.03e-06
lnc-THUMPD3-7:1	313	43	12	147.308	40.2057	-1.87337	Down	1.45e-05	0.000138339
lnc-ZSCAN1-3:6	1096	43	12	42.0688	11.4821	-1.87337	Down	1.45e-05	0.000138484
lnc-TAPT1-4:1	583	43	12	79.0865	21.5856	-1.87337	Down	1.45e-05	0.000138387
lnc-SOWAHB-7:1	610	43	12	75.586	20.6301	-1.87337	Down	1.45e-05	0.000138436
IL10RB-DT:19	3700	143	40	41.4417	11.3373	-1.87001	Down	1.7e-15	6.96e-14
lnc-C9-1:9	730	75	21	110.164	30.168	-1.86856	Down	9.2e-09	1.68e-07
lnc-GRHPR-7:1	799	50	14	67.1005	18.3752	-1.86856	Down	2.93e-06	3.35e-05
lnc-TAS2R1-24:1	2261	199	56	94.3746	25.974	-1.86133	Down	7.19e-21	4.41e-19
lnc-EBLN1-6:1	559	124	35	237.855	65.6609	-1.85698	Down	1.65e-13	5.61e-12
lnc-FMOD-6:1	792	85	24	115.079	31.7787	-1.85649	Down	1.1e-09	2.37e-08
lnc-E2F6-7:1	4819	46	13	10.2354	2.82903	-1.85519	Down	8.23e-06	8.41e-05
lnc-RPIA-1:8	1692	474	134	300.387	83.0529	-1.85472	Down	2.59e-47	4.91e-45
lnc-ZNF487-1:1	1642	53	15	34.6103	9.58007	-1.85309	Down	1.67e-06	2.02e-05
lnc-CRYBA4-52:67	17225	293	83	18.2394	5.05323	-1.85178	Down	8.34e-30	8.29e-28
lnc-TLE4-12:4	4280	321	91	80.42	22.2971	-1.8507	Down	1.77e-32	1.98e-30
lnc-PUS10-4:7	497	67	19	144.551	40.0911	-1.85023	Down	7.07e-08	1.1e-06
lnc-CEACAM21-5:5	1345	74	21	58.9946	16.3737	-1.8492	Down	1.47e-08	2.58e-07
lnc-KLF12-7:2	4862	211	60	46.534	12.9416	-1.84627	Down	8.21e-22	5.33e-20
lnc-GTDC1-9:1	516	109	31	226.506	63.0032	-1.84605	Down	5.88e-12	1.7e-10
LINC02328:58	1760	77	22	46.9117	13.1087	-1.83942	Down	8.42e-09	1.55e-07
lnc-NDRG1-5:1	2145	84	24	41.9909	11.7337	-1.83942	Down	1.75e-09	3.61e-08
lnc-ITGA2-4:3	3851	196	56	54.5739	15.2498	-1.83942	Down	2.84e-20	1.68e-18
lnc-HECA-1:3	3859	91	26	25.2854	7.0656	-1.83942	Down	3.66e-10	8.42e-09
lnc-SERPIND1-2:2	2400	35	10	15.6372	4.36958	-1.83942	Down	0.000115986	0.000870838
lnc-MOV10-1:1	347	73	21	225.578	63.4659	-1.82957	Down	2.33e-08	3.93e-07
lnc-SETBP1-2:1	3680	271	78	78.9631	22.2278	-1.82881	Down	3.04e-27	2.74e-25
lnc-TWSG1-3:1	751	52	15	74.2448	20.946	-1.82561	Down	2.67e-06	3.06e-05
lnc-NOBOX-1:1	4429	90	26	21.7891	6.15628	-1.82348	Down	5.8e-10	1.3e-08
lnc-WRNIP1-18:2	1200	45	13	40.21	11.3609	-1.82348	Down	1.31e-05	0.000127322
lnc-NLN-1:1	649	107	31	176.784	50.0919	-1.81933	Down	1.47e-11	4.04e-10
lnc-EPSTI1-6:1	1214	69	20	60.9443	17.2767	-1.81866	Down	6.43e-08	1.01e-06
lnc-SNU13-3:1	6622	62	18	10.0393	2.85058	-1.81633	Down	3.12e-07	4.26e-06
ADAMTS9-AS2:17	3635	62	18	18.289	5.193	-1.81633	Down	3.12e-07	4.26e-06
lnc-IGSF10-11:2	474	86	25	194.546	55.3111	-1.81447	Down	1.59e-09	3.32e-08
lnc-TLDC1-2:2	2929	55	16	20.1347	5.72864	-1.81342	Down	1.52e-06	1.85e-05
lnc-PSMB9-6:14	9715	48	14	5.29787	1.51125	-1.80967	Down	7.45e-06	7.69e-05
lnc-HSPA13-6:1	933	106	31	121.822	34.8442	-1.80579	Down	2.32e-11	6.24e-10
lnc-C8orf48-7:1	3488	41	12	12.604	3.60791	-1.80465	Down	3.69e-05	0.000317154
lnc-HSD11B1-4:8	658	82	24	133.626	38.2504	-1.80465	Down	4.39e-09	8.49e-08
lnc-FBLN7-2:1	2272	99	29	46.7229	13.3857	-1.80344	Down	1.1e-10	2.72e-09
lnc-TMEM126B-4:1	10158	58	17	6.12241	1.75506	-1.80258	Down	8.65e-07	1.09e-05
lnc-CALML4-4:1	441	75	22	182.358	52.316	-1.80145	Down	2.11e-08	3.61e-07
lnc-CASP6-4:1	1433	92	27	68.8406	19.7591	-1.80074	Down	5.26e-10	1.19e-08
lnc-CLEC16A-1:2	567	109	32	206.132	59.1858	-1.80025	Down	1.33e-11	3.69e-10
LINC02520:29	8570	95	28	11.8863	3.42632	-1.79456	Down	3.02e-10	7.07e-09
lnc-GCH1-2:4	1627	44	13	28.998	8.37927	-1.79106	Down	2.09e-05	0.000191907
lnc-SERTAD2-3:4	10772	115	34	11.4473	3.31004	-1.79009	Down	4.42e-12	1.3e-10
lnc-CHMP7-3:1	1065	71	21	71.4844	20.6786	-1.78949	Down	5.81e-08	9.19e-07
lnc-GRAMD4-4:1	3205	152	45	50.8532	14.7243	-1.78814	Down	1.7e-15	6.95e-14
LINC00402:2	3567	155	46	46.5941	13.524	-1.78463	Down	9.84e-16	4.14e-14
lnc-STK4-1:1	1508	562	167	399.611	116.136	-1.78279	Down	6.43e-53	1.41e-50
lnc-TMEM163-4:1	10386	1032	307	106.545	30.9985	-1.7812	Down	1.4e-95	6.97e-93
lnc-GPR155-4:1	745	191	57	274.903	80.236	-1.7766	Down	6.12e-19	3.33e-17
lnc-TTN-1:1	771	40	12	55.6299	16.3222	-1.76903	Down	5.85e-05	0.000477871
lnc-IGFBP3-4:10	818	50	15	65.542	19.2304	-1.76903	Down	6.69e-06	6.98e-05
lnc-SELE-1:2	628	50	15	85.3715	25.0485	-1.76903	Down	6.69e-06	6.97e-05
lnc-ATXN7-16:2	2562	40	12	16.7411	4.91194	-1.76903	Down	5.85e-05	0.000478014
lnc-ANKS4B-5:12	2322	50	15	23.0893	6.77454	-1.76903	Down	6.69e-06	6.97e-05
lnc-HEATR4-10:1	887	80	24	96.7095	28.3752	-1.76903	Down	1.09e-08	1.96e-07
lnc-GMNN-5:2	2646	173	52	70.1066	20.6093	-1.76625	Down	3.63e-17	1.73e-15
lnc-BRD2-6:3	800	53	16	71.0377	20.974	-1.75998	Down	3.79e-06	4.2e-05
lnc-ACOT13-3:1	273	53	16	208.169	61.4622	-1.75998	Down	3.79e-06	4.2e-05
lnc-KIAA0100-4:1	2975	76	23	27.3924	8.10758	-1.75643	Down	2.98e-08	4.96e-07
lnc-RALGAPA2-5:2	1933	76	23	42.1584	12.478	-1.75643	Down	2.98e-08	4.97e-07
lnc-POTEB2-2:1	1602	56	17	37.4825	11.1285	-1.75196	Down	2.15e-06	2.53e-05
FLG-AS1:23	5365	56	17	11.1923	3.323	-1.75196	Down	2.15e-06	2.53e-05
lnc-SPP2-7:1	4184	79	24	20.2459	6.01548	-1.75088	Down	1.7e-08	2.97e-07
lnc-DMXL1-8:1	3254	395	120	130.161	38.6736	-1.75088	Down	8.55e-37	1.16e-34
lnc-FRAT1-7:1	468	46	14	105.394	31.3713	-1.74827	Down	1.86e-05	0.000172543
lnc-UROD-2:1	1709	46	14	28.8615	8.59086	-1.74827	Down	1.86e-05	0.000172485
lnc-LOX-4:12	10005	131	40	14.0397	4.1927	-1.74356	Down	3.92e-13	1.29e-11
lnc-ZSCAN1-3:4	2310	131	40	60.8082	18.1593	-1.74356	Down	3.92e-13	1.29e-11
lnc-CPLX1-4:1	367	72	22	210.363	62.8648	-1.74256	Down	8.18e-08	1.26e-06
lnc-HPGD-5:1	2009	85	26	45.3672	13.572	-1.74101	Down	5.56e-09	1.05e-07
lnc-CLTRN-1:1	1873	75	23	42.9365	12.8778	-1.73732	Down	4.67e-08	7.46e-07
lnc-IER3-15:2	4545	169	52	39.8709	11.9983	-1.7325	Down	2.14e-16	9.5e-15
lnc-XPO1-9:2	795	39	12	52.6018	15.8294	-1.7325	Down	9.24e-05	0.00071419
lnc-FAN1-12:1	447	91	28	218.291	65.6903	-1.7325	Down	1.82e-09	3.73e-08
lnc-KLF5-12:1	2130	188	58	94.6414	28.5561	-1.72867	Down	5.04e-18	2.56e-16
lnc-FAS-2:2	5757	230	71	42.8385	12.9334	-1.72781	Down	1.06e-21	6.8e-20
lnc-CASP4-1:2	771	204	63	283.713	85.6913	-1.72721	Down	2.07e-19	1.17e-17
lnc-GOLGA7B-2:1	695	152	47	234.51	70.9192	-1.7254	Down	8.16e-15	3.08e-13
lnc-MAP3K7-3:3	618	42	13	72.8725	22.06	-1.72394	Down	5.19e-05	0.000428093
LINC01238:10	552	58	18	112.666	34.1967	-1.72012	Down	1.91e-06	2.28e-05
lnc-DNAL4-4:1	1526	58	18	40.7546	12.37	-1.72012	Down	1.91e-06	2.28e-05
lnc-AFG3L2-7:1	705	74	23	112.55	34.2129	-1.71796	Down	7.28e-08	1.13e-06
LINC01588:41	4835	90	28	19.9595	6.07312	-1.71656	Down	2.83e-09	5.65e-08
lnc-SPTBN5-2:1	1590	48	15	32.3703	9.89338	-1.71014	Down	1.65e-05	0.000156311
LINC01135:12	3162	48	15	16.2773	4.97485	-1.71014	Down	1.65e-05	0.000156257
lnc-SCAF8-2:1	1940	163	51	90.0925	27.5689	-1.70837	Down	1.39e-15	5.72e-14
lnc-SPTBN4-1:4	503	67	21	142.827	43.7826	-1.70584	Down	3.5e-07	4.76e-06
lnc-IGLL1-1:30	1437	70	22	52.2329	16.0552	-1.70192	Down	1.99e-07	2.82e-06
lnc-CERK-2:1	805	57	18	75.9245	23.4492	-1.69503	Down	2.98e-06	3.4e-05
lnc-PROSER1-3:1	7541	196	62	27.8695	8.62211	-1.69258	Down	3.18e-18	1.65e-16
lnc-SLC39A10-3:1	2065	665	211	345.306	107.155	-1.68817	Down	7.76e-58	1.95e-55
lnc-RNMT-8:1	1951	85	27	46.7159	14.513	-1.68657	Down	1.2e-08	2.12e-07
lnc-HELB-2:1	2593	151	48	62.4421	19.4129	-1.68551	Down	2.69e-14	9.81e-13
lnc-CCDC167-2:2	5120	66	21	13.8222	4.3013	-1.68414	Down	5.44e-07	7.19e-06
lnc-TMEM230-5:1	1175	44	14	40.153	12.4951	-1.68414	Down	4.57e-05	0.000385896
lnc-MIER3-2:1	619	44	14	76.2193	23.7185	-1.68414	Down	4.57e-05	0.000385777
lnc-KMT2C-3:2	3268	69	22	22.6397	7.05978	-1.68116	Down	3.09e-07	4.23e-06
lnc-ME3-1:1	2095	47	15	24.0556	7.50858	-1.67976	Down	2.57e-05	0.000230795
lnc-WNT2-6:1	685	47	15	73.5716	22.9642	-1.67976	Down	2.57e-05	0.000230719
lnc-ADAM19-2:4	10980	47	15	4.58985	1.43265	-1.67976	Down	2.57e-05	0.000230644
lnc-TMEM160-2:1	431	72	23	179.126	55.963	-1.67843	Down	1.76e-07	2.52e-06
lnc-SLC40A1-3:2	425	172	55	433.953	135.714	-1.67697	Down	5.58e-16	2.4e-14
lnc-SPATA21-3:1	545	100	32	196.746	61.575	-1.67592	Down	7.27e-10	1.59e-08
lnc-CHST3-1:1	556	103	33	198.639	62.2429	-1.67417	Down	4.15e-10	9.47e-09
lnc-POLR1A-6:1	3652	187	60	54.9052	17.2294	-1.67207	Down	3.51e-17	1.67e-15
lnc-NEFL-6:15	7693	816	262	113.736	35.7155	-1.67107	Down	1.4e-69	4.62e-67
lnc-CXorf36-46:9	16111	229	74	15.2411	4.81681	-1.66181	Down	1.54e-20	9.24e-19
lnc-TMEM161B-8:1	527	198	64	402.863	127.356	-1.66142	Down	5.91e-18	2.98e-16
lnc-DTWD2-15:5	5040	541	175	115.098	36.4131	-1.66034	Down	2.65e-46	4.87e-44
lnc-RFX8-3:1	425	74	24	186.701	59.2206	-1.65655	Down	1.55e-07	2.27e-06
lnc-CPB2-2:1	290	74	24	273.613	86.7888	-1.65655	Down	1.55e-07	2.27e-06
lnc-CRYBA4-52:68	33493	1022	332	32.719	10.3952	-1.6542	Down	1.81e-85	7.74e-83
lnc-CPLX1-2:9	1231	80	26	69.6843	22.1496	-1.65355	Down	5.01e-08	7.98e-07
lnc-IRAK2-4:1	1707	40	13	25.1263	7.98657	-1.65355	Down	0.00012675	0.000941058
lnc-ECHDC3-9:1	1554	286	93	197.341	62.7599	-1.65278	Down	4.37e-25	3.45e-23
lnc-PLCXD2-1:1	959	43	14	48.0787	15.3095	-1.65097	Down	7.11e-05	0.000571925
lnc-KLF12-7:1	3265	279	91	91.6271	29.2287	-1.64839	Down	2.01e-24	1.54e-22
lnc-HTRA4-2:1	669	95	31	152.265	48.5944	-1.64772	Down	3.02e-09	5.97e-08
lnc-ZNF674-7:1	2299	101	33	47.107	15.0531	-1.64588	Down	9.85e-10	2.13e-08
lnc-IQCG-5:2	3250	101	33	33.3227	10.6483	-1.64588	Down	9.85e-10	2.13e-08
lnc-PGAP1-3:1	1115	52	17	50.007	15.9891	-1.64504	Down	1.27e-05	0.000123341
lnc-PUS10-5:2	3718	797	261	229.854	73.6176	-1.64259	Down	2.16e-66	6.48e-64
lnc-AMZ2-8:1	2919	186	61	68.3253	21.9152	-1.64049	Down	1.12e-16	5.14e-15
lnc-MAPK6-3:9	2073	73	24	37.7595	12.1412	-1.63693	Down	2.38e-07	3.34e-06
H19:7	1612	155	51	103.103	33.1784	-1.63576	Down	4.36e-14	1.56e-12
lnc-ORC1-4:1	521	82	27	168.764	54.3471	-1.63473	Down	4.39e-08	7.09e-07
lnc-MRPS5-3:1	713	85	28	127.83	41.1831	-1.6341	Down	2.5e-08	4.21e-07
lnc-ECHDC3-6:1	2874	170	56	63.4256	20.4339	-1.6341	Down	2.72e-15	1.09e-13
lnc-VIPR1-6:1	6303	185	61	31.4722	10.1492	-1.63271	Down	1.71e-16	7.69e-15
lnc-ZEB2-1:14	2967	218	72	78.7847	25.4487	-1.63032	Down	3.9e-19	2.17e-17
lnc-BYSL-2:1	1265	136	45	115.279	37.3055	-1.62767	Down	1.87e-12	5.69e-11
LINC01089:31	3897	48	16	13.2073	4.30566	-1.61703	Down	3.48e-05	0.000304065
lnc-GTPBP1-5:1	416	42	14	108.258	35.2927	-1.61703	Down	0.000110087	0.000828594
lnc-TMEM138-3:1	2594	42	14	17.3613	5.6599	-1.61703	Down	0.000110087	0.000828822
lnc-PEAK1-4:2	672	120	40	191.476	62.4225	-1.61703	Down	4.63e-11	1.2e-09
lnc-SELENOF-2:5	7131	45	15	6.76651	2.20593	-1.61703	Down	6.18e-05	0.00050304
lnc-ASMT-5:1	1945	66	22	36.3854	11.8619	-1.61703	Down	1.13e-06	1.41e-05
lnc-ACTR3-2:1	676	81	27	128.482	41.8859	-1.61703	Down	6.73e-08	1.05e-06
lnc-RTRAF-2:2	578	72	24	133.57	43.5446	-1.61703	Down	3.66e-07	4.95e-06
lnc-GRAPL-1:1	1486	72	24	51.9537	16.9373	-1.61703	Down	3.66e-07	4.96e-06
lnc-FAM162A-2:9	1169	48	16	44.0281	14.3534	-1.61703	Down	3.48e-05	0.000303968
lnc-DCAF16-1:2	533	66	22	132.776	43.2859	-1.61703	Down	1.13e-06	1.41e-05
lnc-DERL2-1:2	1750	81	27	49.6306	16.1799	-1.61703	Down	6.73e-08	1.05e-06
CHRM3-AS2:9	2431	69	23	30.4345	9.92187	-1.61703	Down	6.44e-07	8.32e-06
lnc-DEF8-2:11	1706	66	22	41.4828	13.5237	-1.61703	Down	1.13e-06	1.42e-05
lnc-INSR-6:1	678	66	22	104.38	34.0286	-1.61703	Down	1.13e-06	1.41e-05
lnc-RPS27-2:1	380	54	18	152.375	49.6752	-1.61703	Down	1.11e-05	0.000109267
lnc-ZDHHC14-7:1	623	96	32	165.229	53.8657	-1.61703	Down	4.05e-09	7.88e-08
lnc-RPS7-3:1	2915	90	30	33.106	10.7928	-1.61703	Down	1.25e-08	2.21e-07
lnc-RTP5-8:19	1445	42	14	31.1662	10.1604	-1.61703	Down	0.000110087	0.000828366
lnc-PAPOLG-13:1	4368	412	138	101.139	33.132	-1.61004	Down	3.46e-34	4.22e-32
lnc-ABCC6-11:1	4209	191	64	48.6583	15.946	-1.60949	Down	1.15e-16	5.28e-15
lnc-CDHR3-1:6	4810	146	49	32.547	10.6832	-1.60718	Down	4.71e-13	1.54e-11
lnc-RGS5-1:11	581	217	73	400.485	131.764	-1.60379	Down	1.21e-18	6.44e-17
lnc-FGD4-9:1	1357	98	33	77.4371	25.5026	-1.60238	Down	3.54e-09	6.93e-08
lnc-PPIL4-9:1	1335	71	24	57.0269	18.853	-1.59685	Down	5.6e-07	7.38e-06
lnc-MAP3K14-3:10	335	68	23	217.654	72.0002	-1.59596	Down	9.86e-07	1.24e-05
LINC00426:4	1079	65	22	64.5944	21.3822	-1.595	Down	1.74e-06	2.09e-05
lnc-OIP5-1:1	10347	62	21	6.4251	2.12841	-1.59394	Down	3.07e-06	3.5e-05
lnc-DPP4-9:1	618	59	20	102.368	33.9385	-1.59278	Down	5.42e-06	5.79e-05
lnc-RIOK1-2:1	1676	56	19	35.8275	11.8886	-1.59149	Down	9.59e-06	9.58e-05
lnc-GALC-1:2	546	47	16	92.3013	30.7311	-1.58665	Down	5.35e-05	0.000439005
lnc-BTK-1:2	587	91	31	166.229	55.3827	-1.58566	Down	1.65e-08	2.89e-07
lnc-HAND1-8:2	544	44	15	86.7274	28.9163	-1.5846	Down	9.51e-05	0.000734697
lnc-CD3D-3:1	819	88	30	115.213	38.4139	-1.5846	Down	2.9e-08	4.85e-07
lnc-TEX35-1:2	2577	123	42	51.1792	17.0917	-1.58226	Down	5.35e-11	1.37e-09
lnc-FAM181B-5:5	460	82	28	191.143	63.8338	-1.58226	Down	8.94e-08	1.37e-06
lnc-BEND4-3:2	2465	76	26	33.0597	11.0613	-1.57955	Down	2.76e-07	3.83e-06
lnc-LEF1-1:3	568	149	51	281.281	94.1613	-1.57881	Down	5.43e-13	1.76e-11
lnc-WNT5B-6:1	2023	93	32	49.2935	16.5884	-1.57122	Down	1.43e-08	2.53e-07
lnc-FH-8:1	2077	61	21	31.4917	10.6031	-1.57048	Down	4.69e-06	5.09e-05
lnc-WEE1-3:1	1439	139	48	103.575	34.9809	-1.56604	Down	4.36e-12	1.29e-10
lnc-CEACAM4-5:1	702	55	19	84.0095	28.3836	-1.5655	Down	1.47e-05	0.000140003
lnc-OTUD7A-3:1	4478	136	47	32.5655	11.0069	-1.56494	Down	7.59e-12	2.17e-10
lnc-USP6NL-4:1	430	52	18	129.669	43.899	-1.56258	Down	2.6e-05	0.000232102
lnc-MMP23B-4:1	1422	75	26	56.5541	19.1745	-1.56044	Down	4.2e-07	5.6e-06
lnc-NEDD8-MDP1-1:17	716	115	40	172.222	58.5865	-1.55563	Down	3.75e-10	8.6e-09
lnc-SNRPN-161:1	2022	46	16	24.3938	8.29831	-1.55563	Down	8.18e-05	0.000643588
lnc-OVGP1-1:1	2023	92	32	48.7635	16.5884	-1.55563	Down	2.18e-08	3.7e-07
lnc-DCUN1D1-9:2	699	46	16	70.564	24.0045	-1.55563	Down	8.18e-05	0.000643773
lnc-SUPT16H-2:1	578	135	47	250.443	85.2748	-1.55429	Down	1.15e-11	3.19e-10
lnc-CYP4F22-5:1	5227	66	23	13.5392	4.61451	-1.5529	Down	2.29e-06	2.69e-05
lnc-CLIC6-5:1	348	100	35	308.123	105.473	-1.54664	Down	6.13e-09	1.15e-07
lnc-RNASEH1-7:2	405	60	21	158.854	54.377	-1.54664	Down	7.13e-06	7.41e-05
lnc-FBXO43-6:1	580	111	39	205.21	70.5159	-1.54108	Down	9.89e-10	2.13e-08
lnc-KMT2C-2:2	223	74	26	355.819	122.27	-1.54108	Down	6.36e-07	8.23e-06
[truncated: 337 more rows]
